# Supplementary material
Source: PubMed Central journal article supplement (PMC4730870)

## COMPOUND 1

$^1\text{H}$  NMR spectrum ( $\delta$ ,  $\text{CDCl}_3$ , 300 MHz)

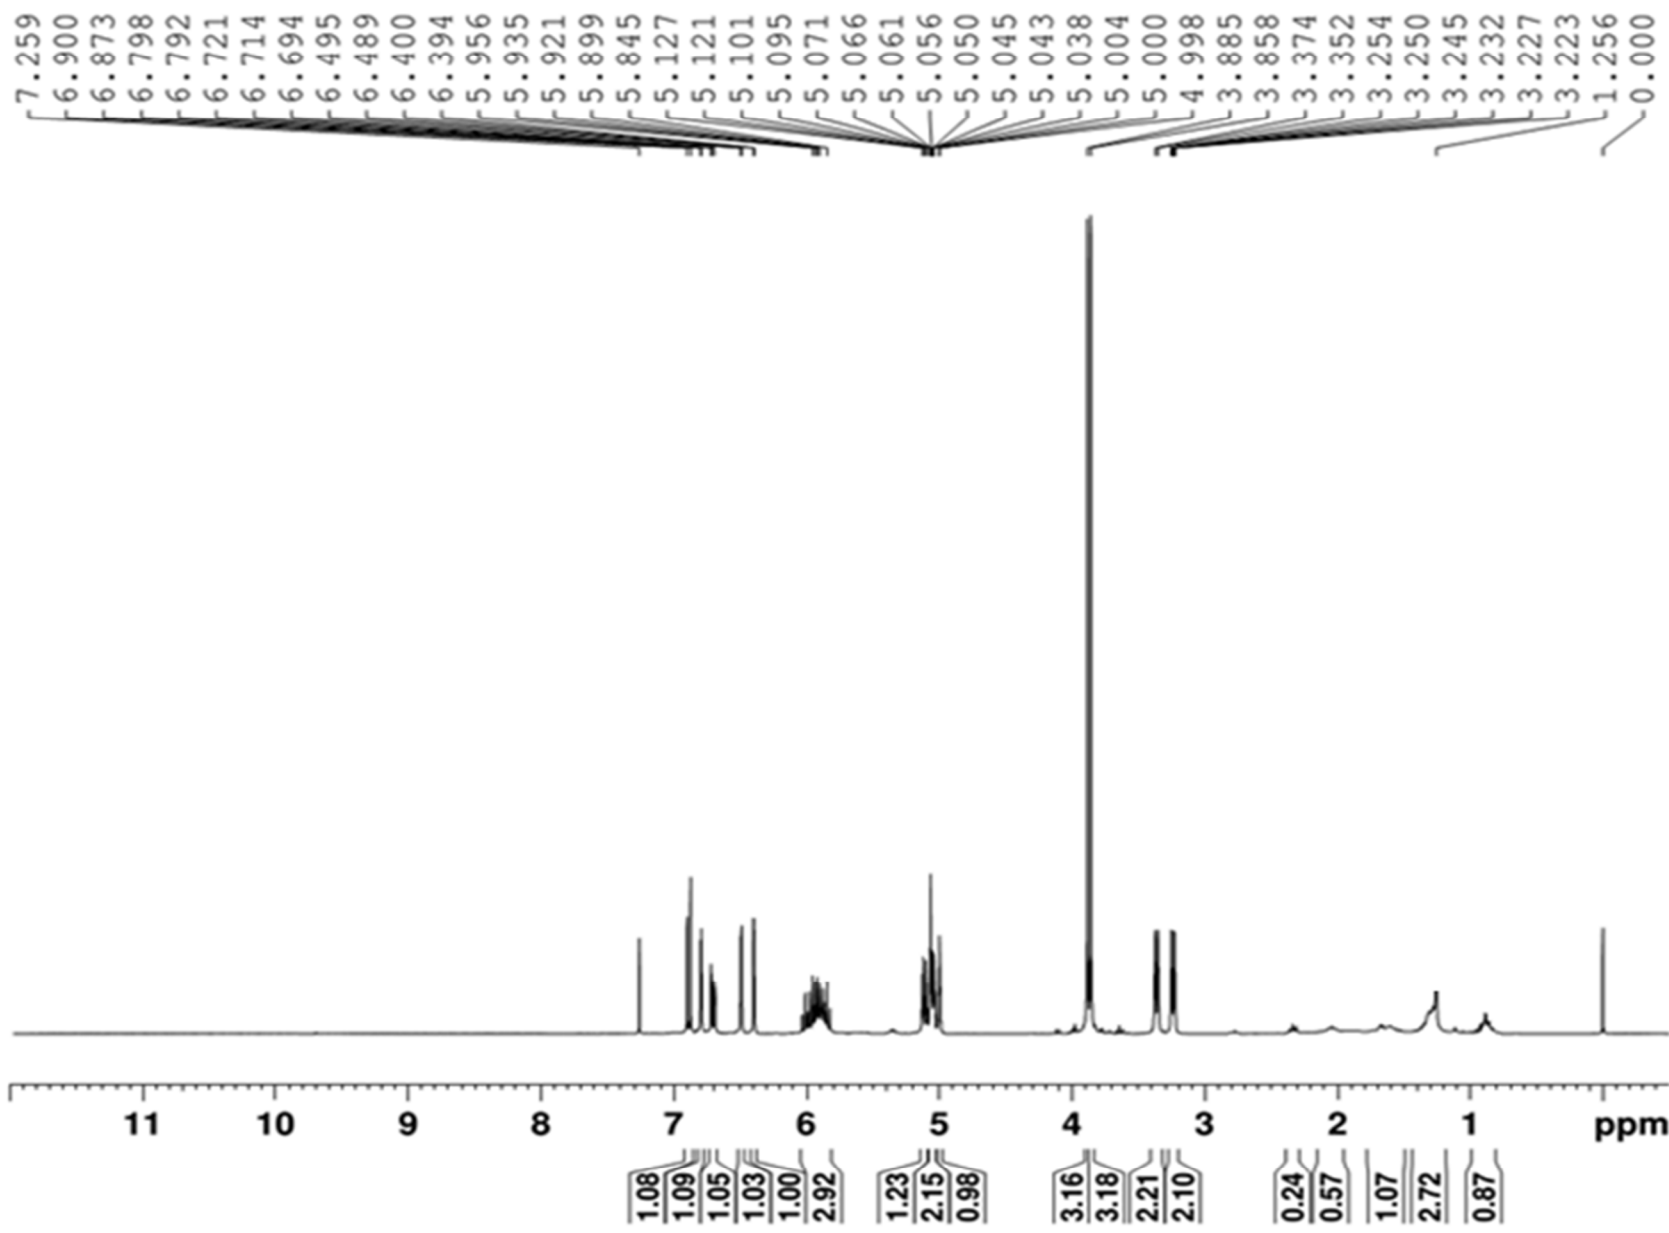

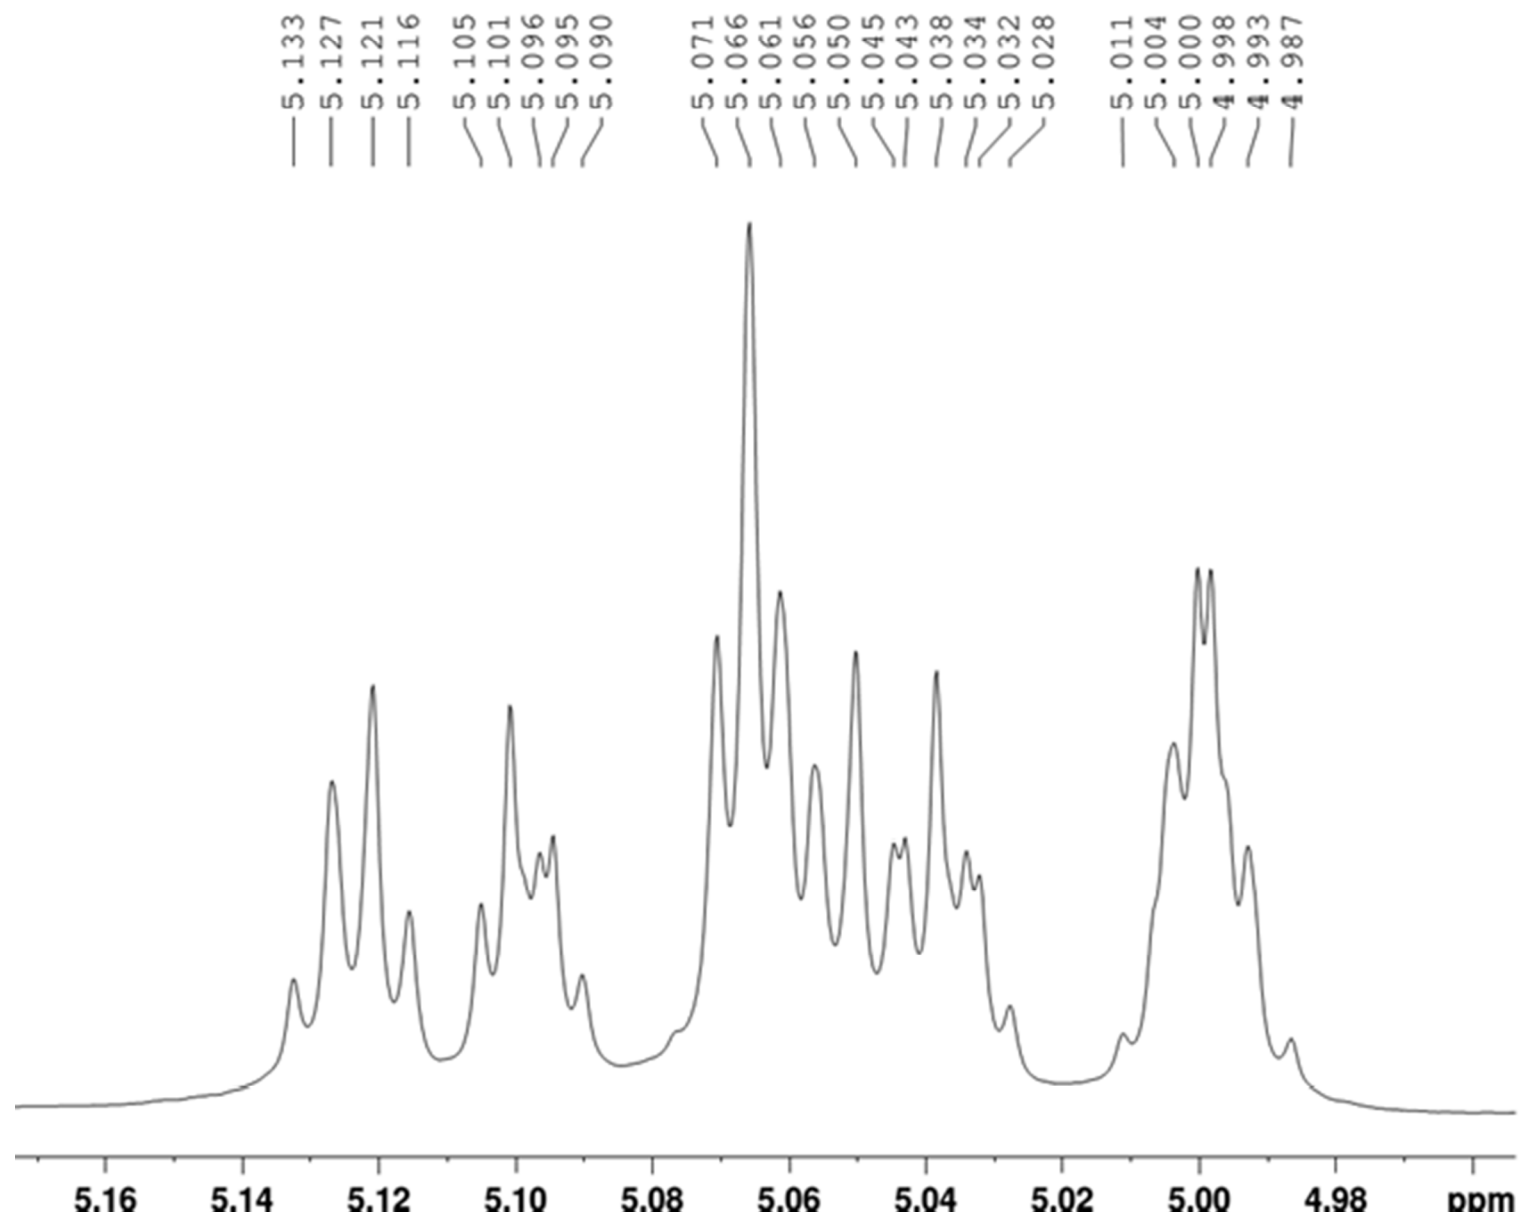

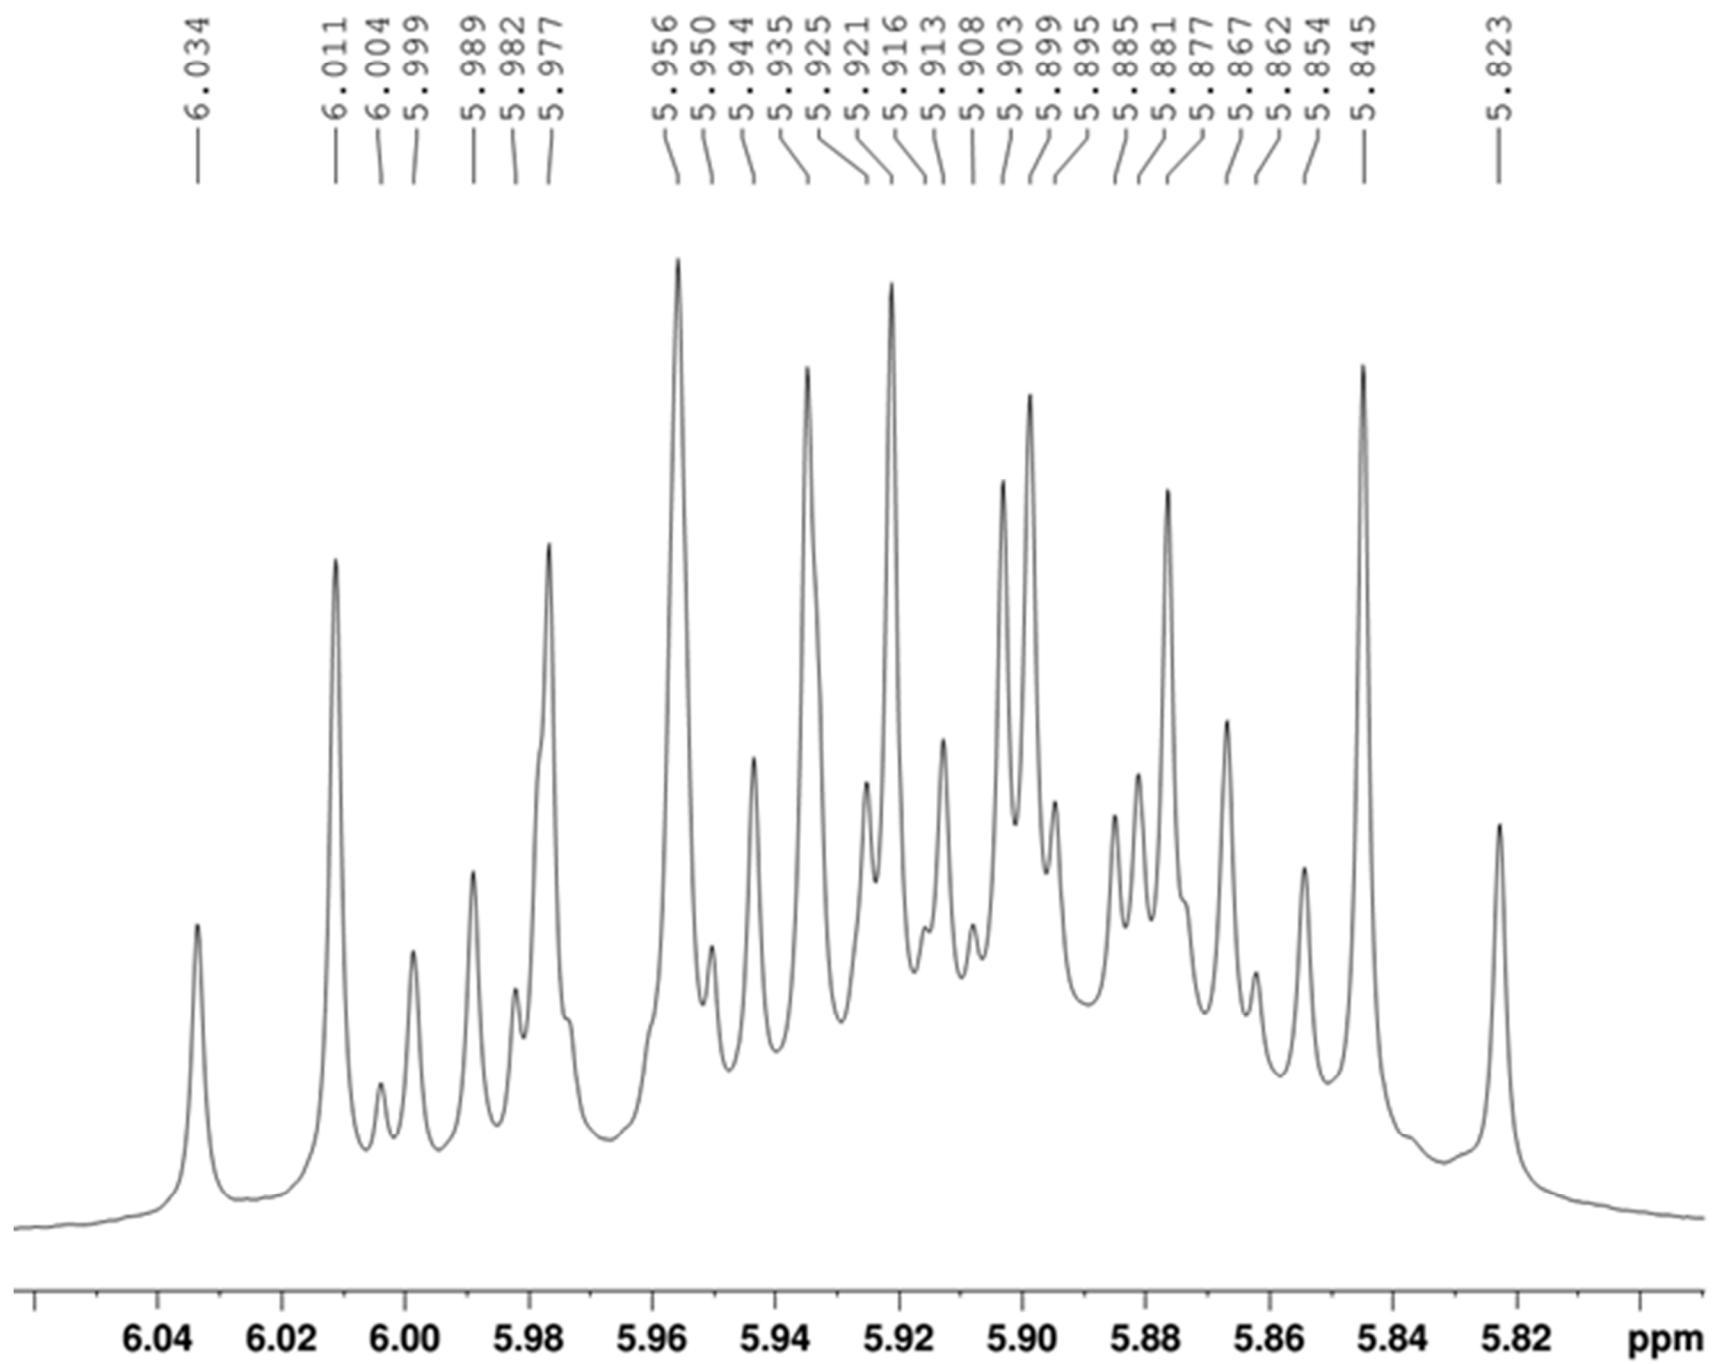



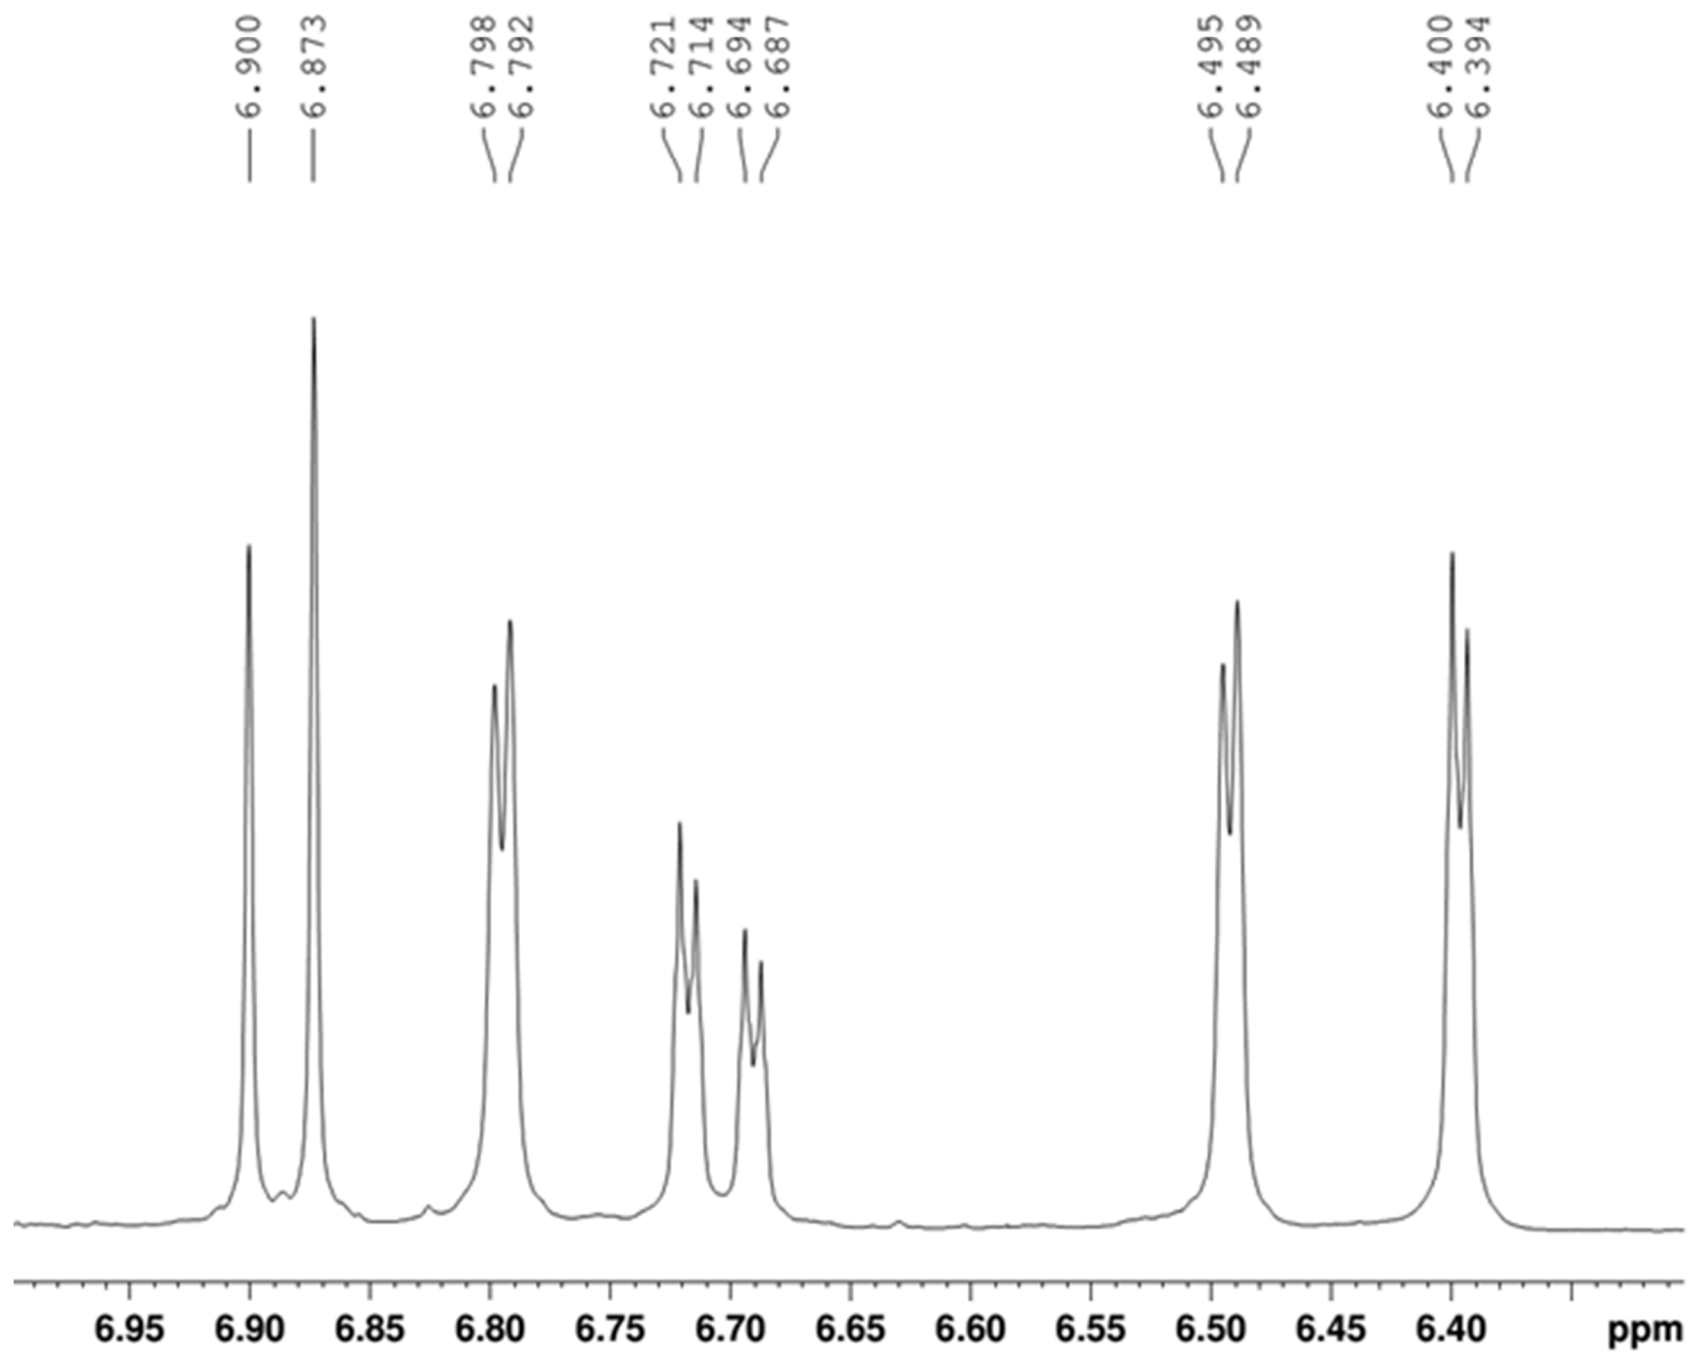

## COMPOUND 1

$^{13}\text{C}$  NMR spectrum ( $\delta$ ,  $\text{CDCl}_3$ , 75 MHz)

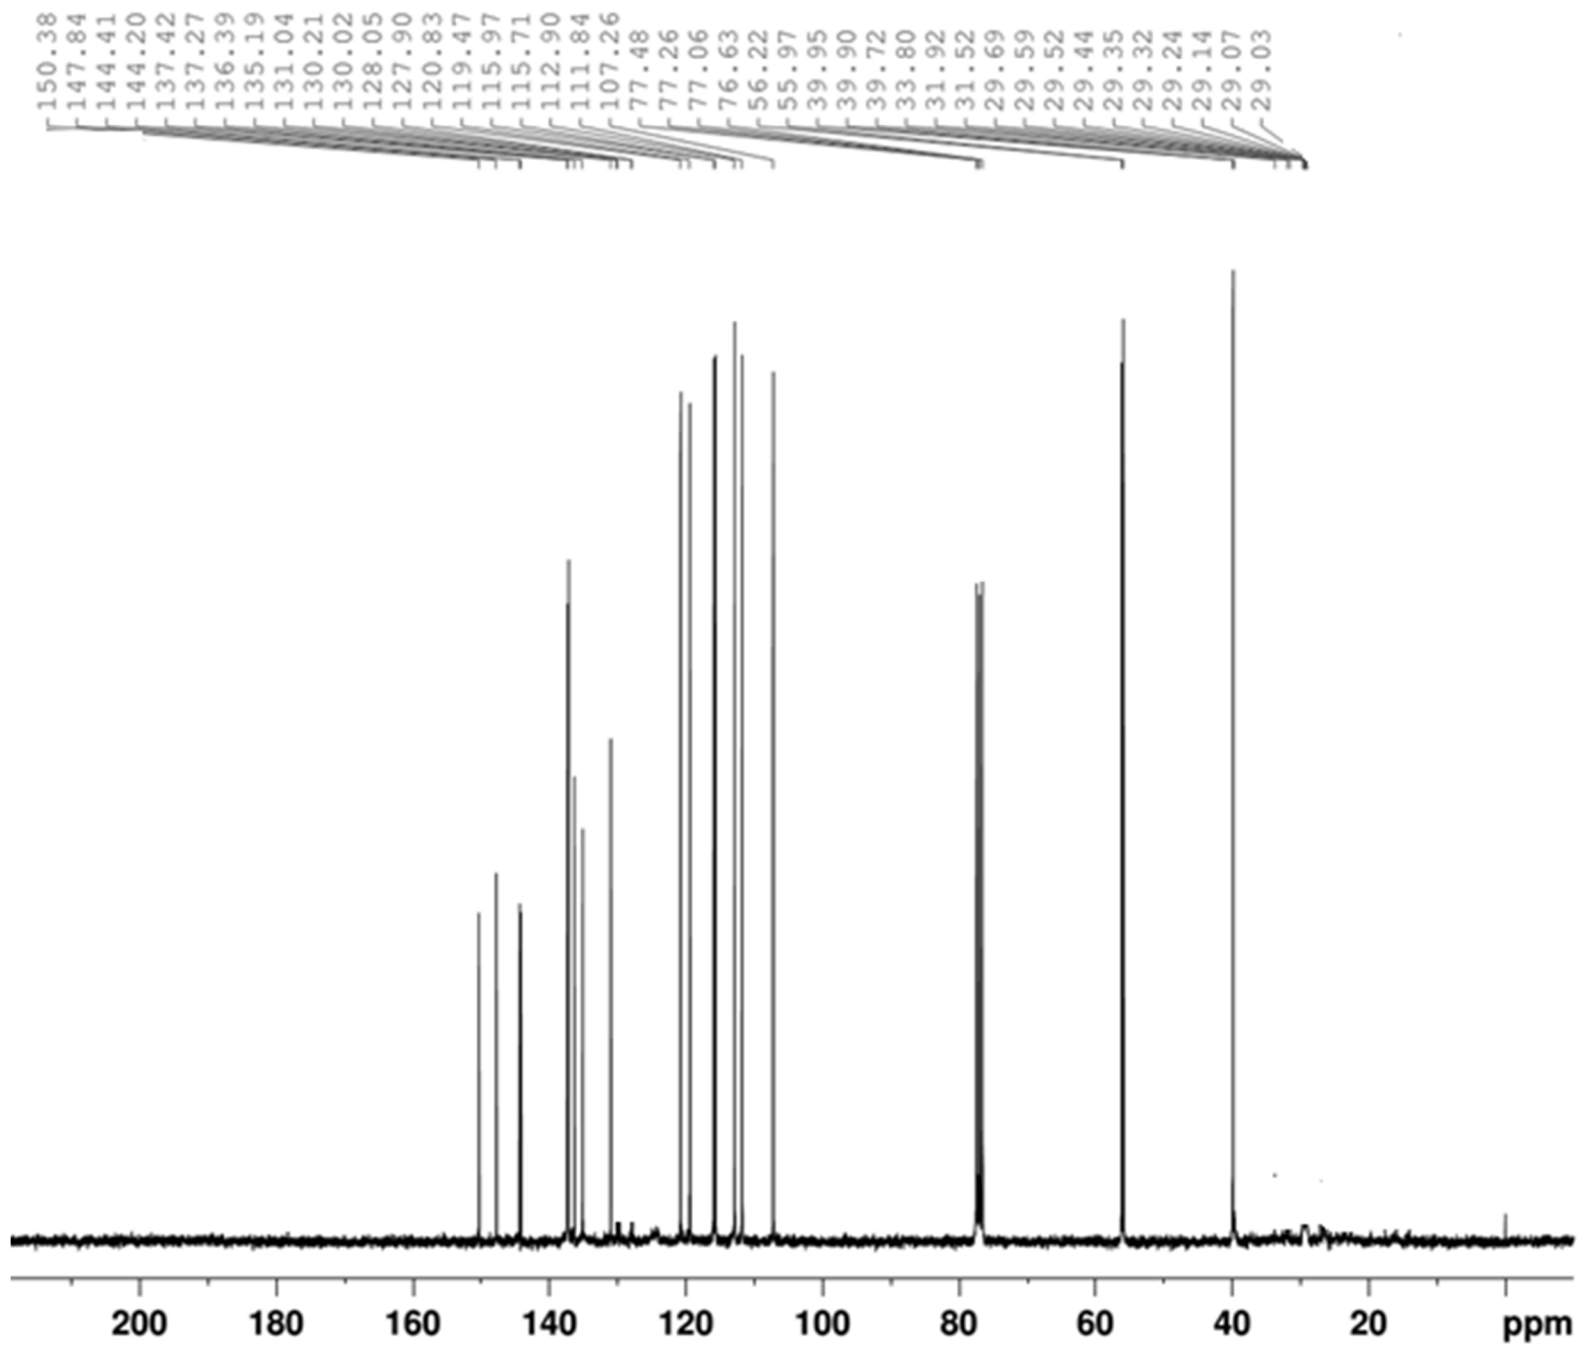

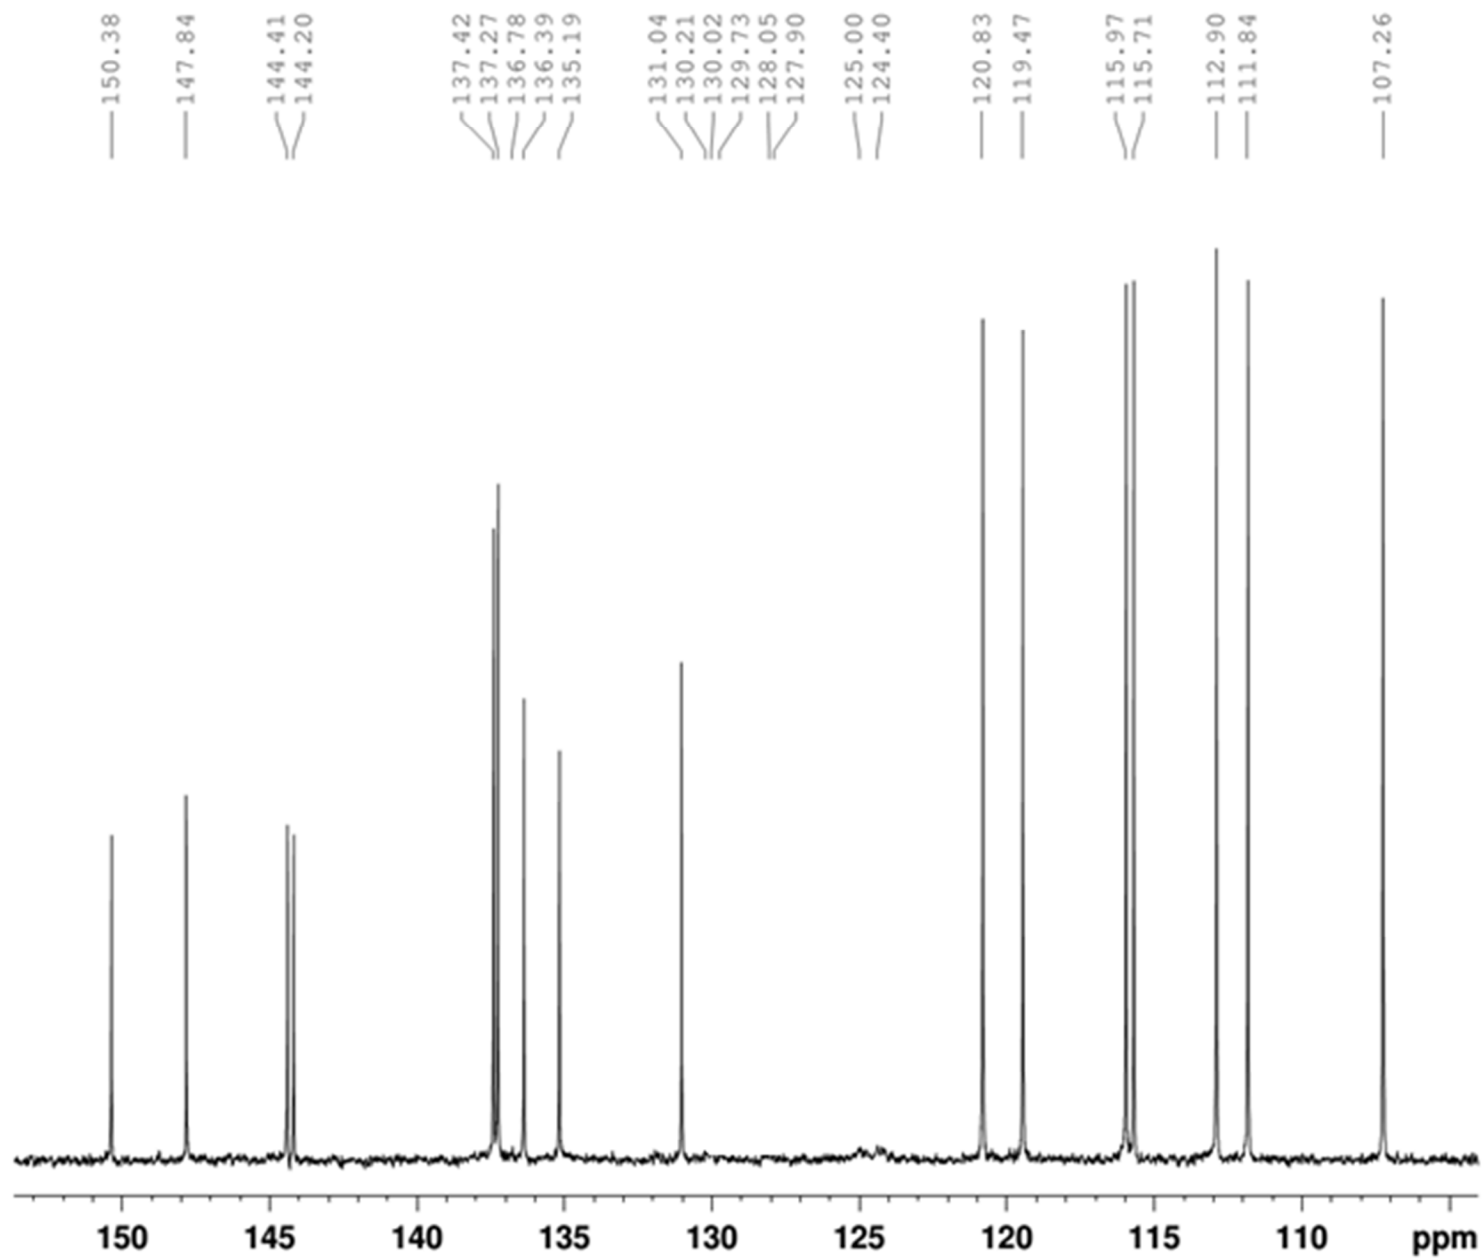

## COMPOUND 1

DEPT 135° NMR spectrum ( $\delta$ , CDCl<sub>3</sub>, 75 MHz)

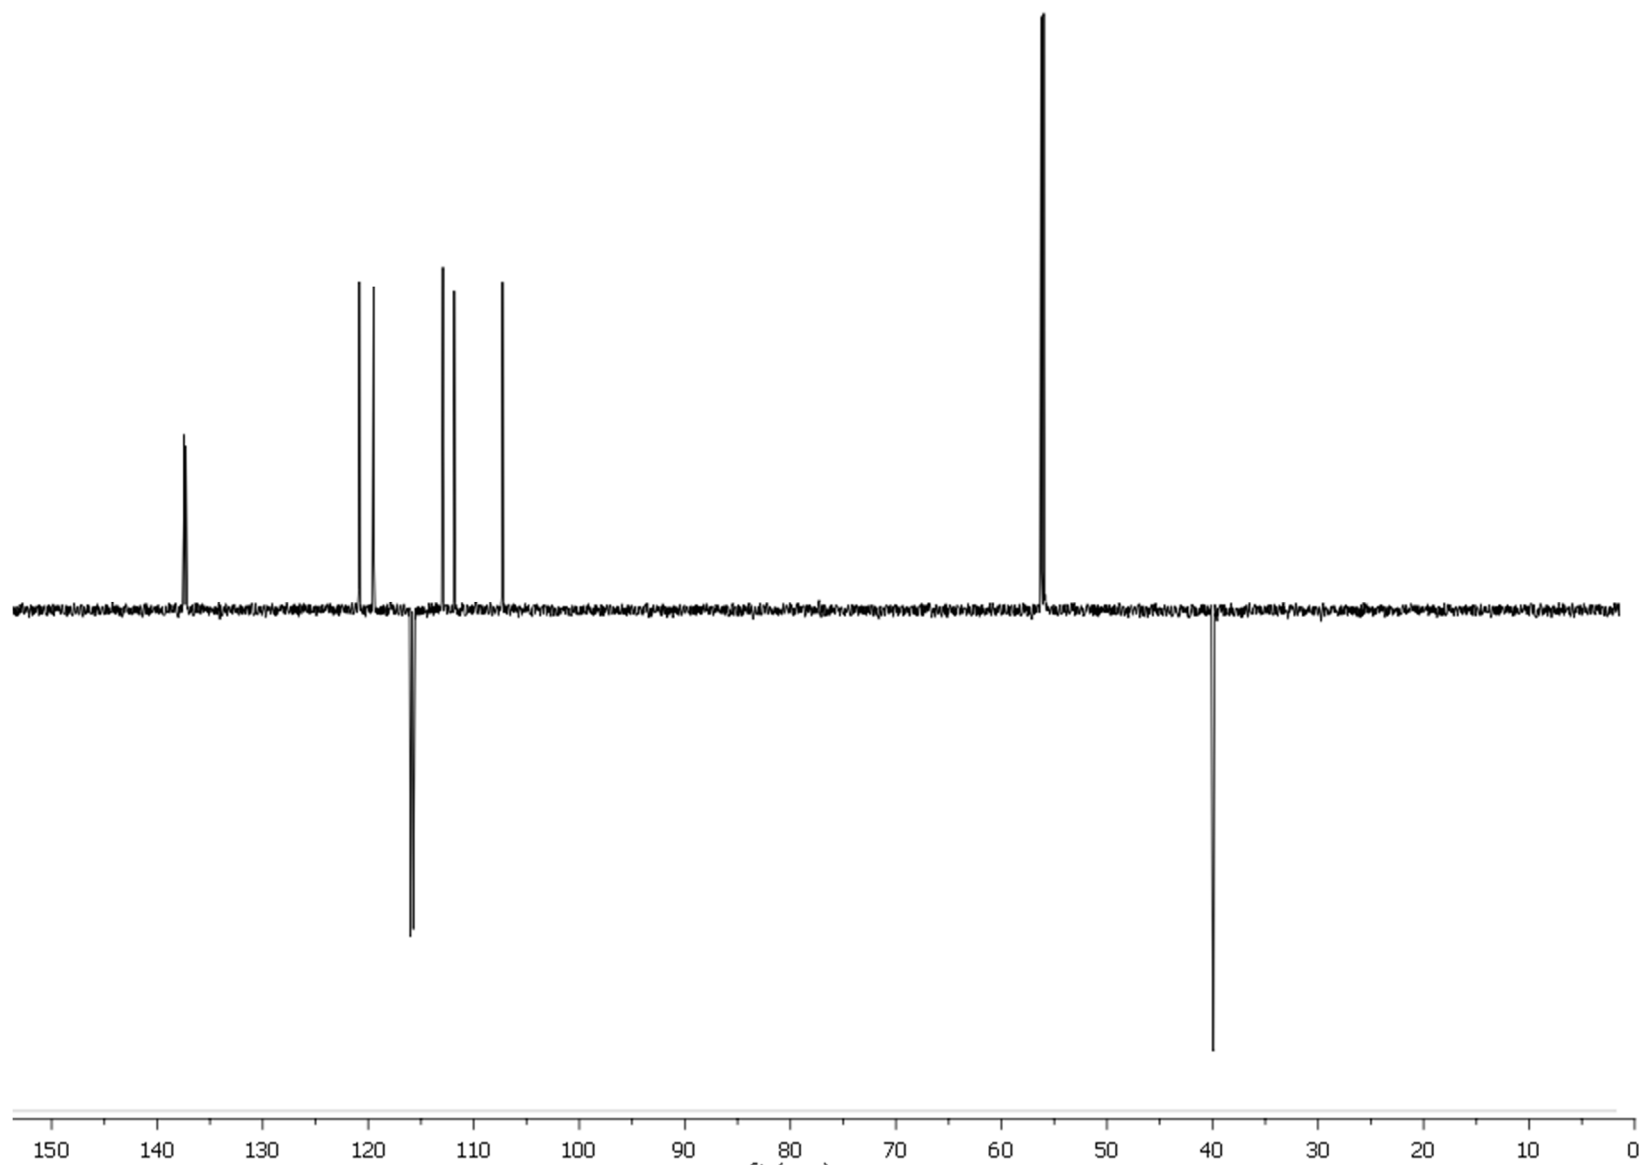

## **COMPOUND 1**

HMBC NMR spectrum ( $\delta$ , CDCl<sub>3</sub>, 300 and 75 MHz)

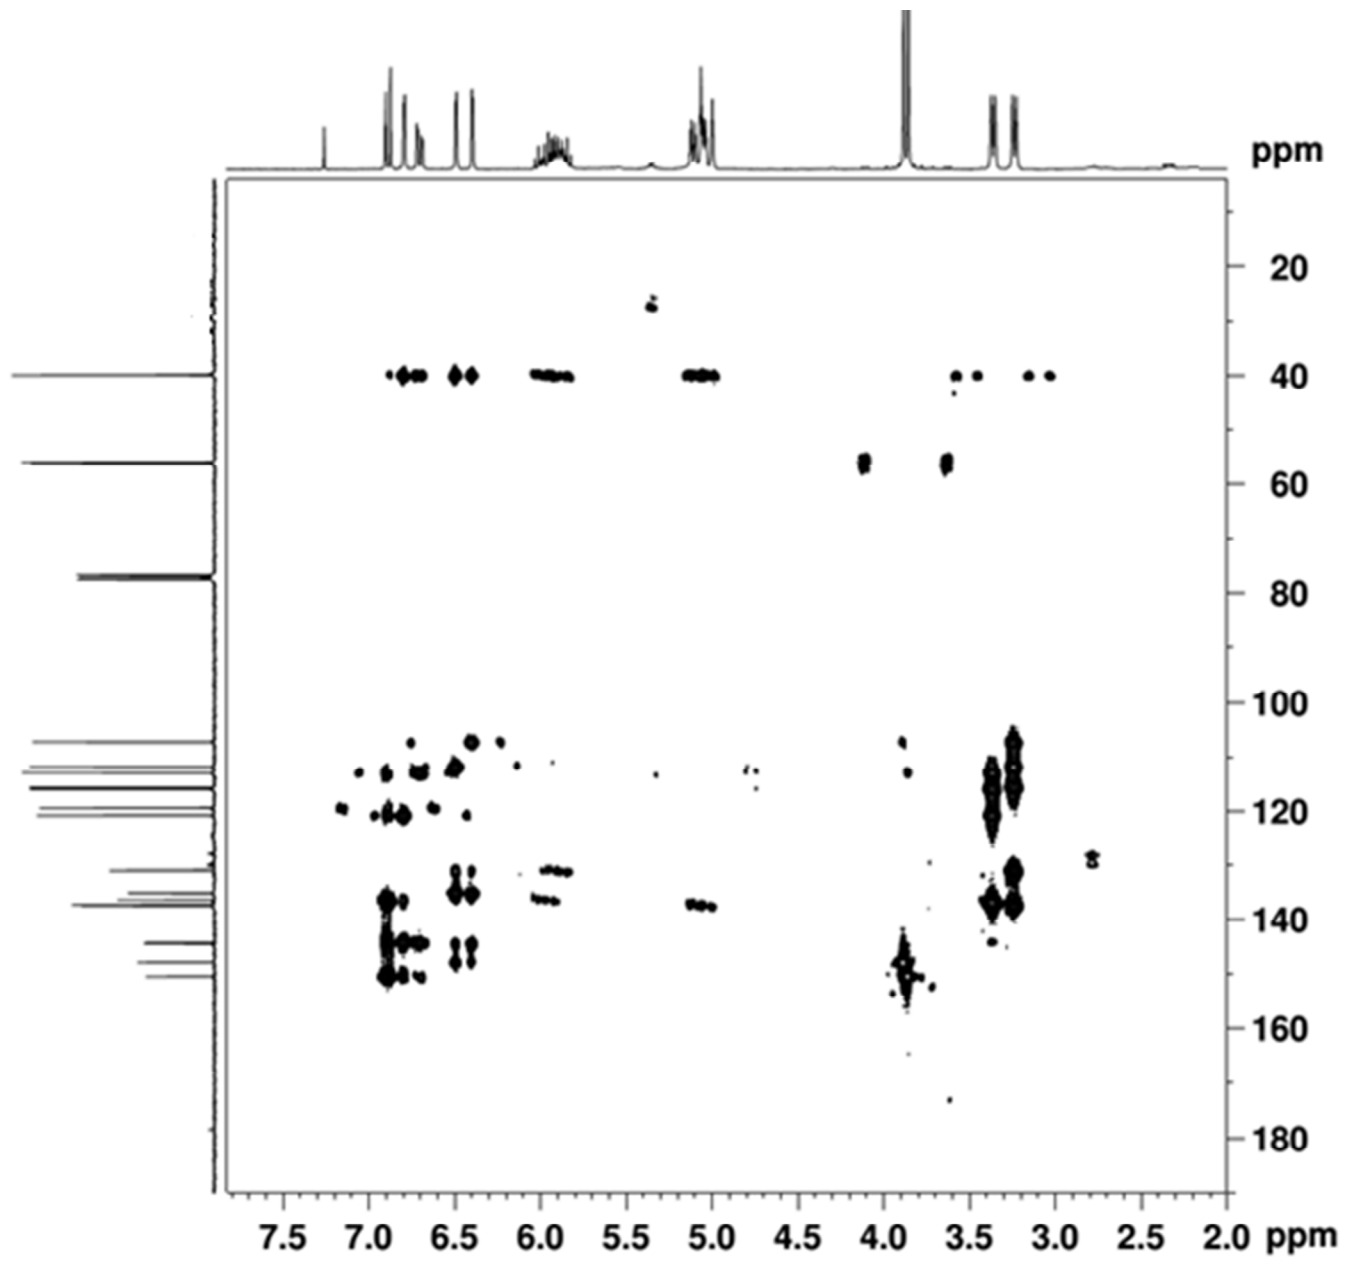



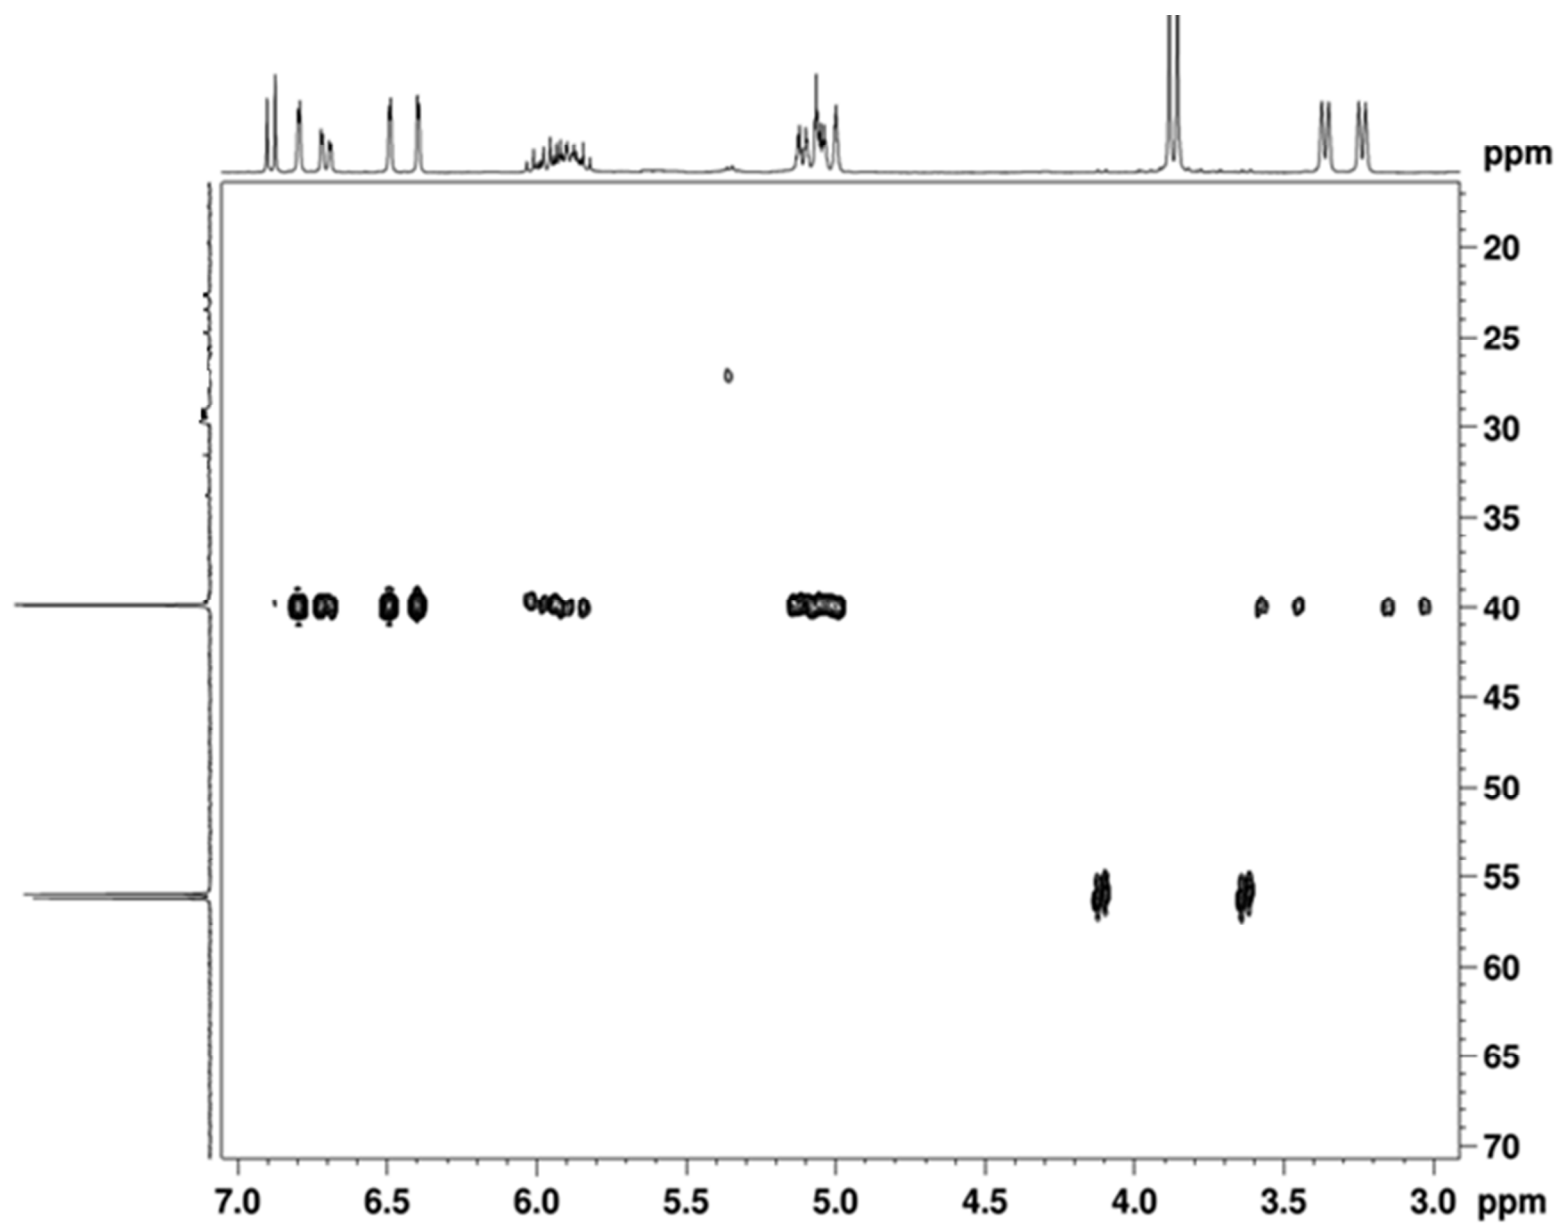

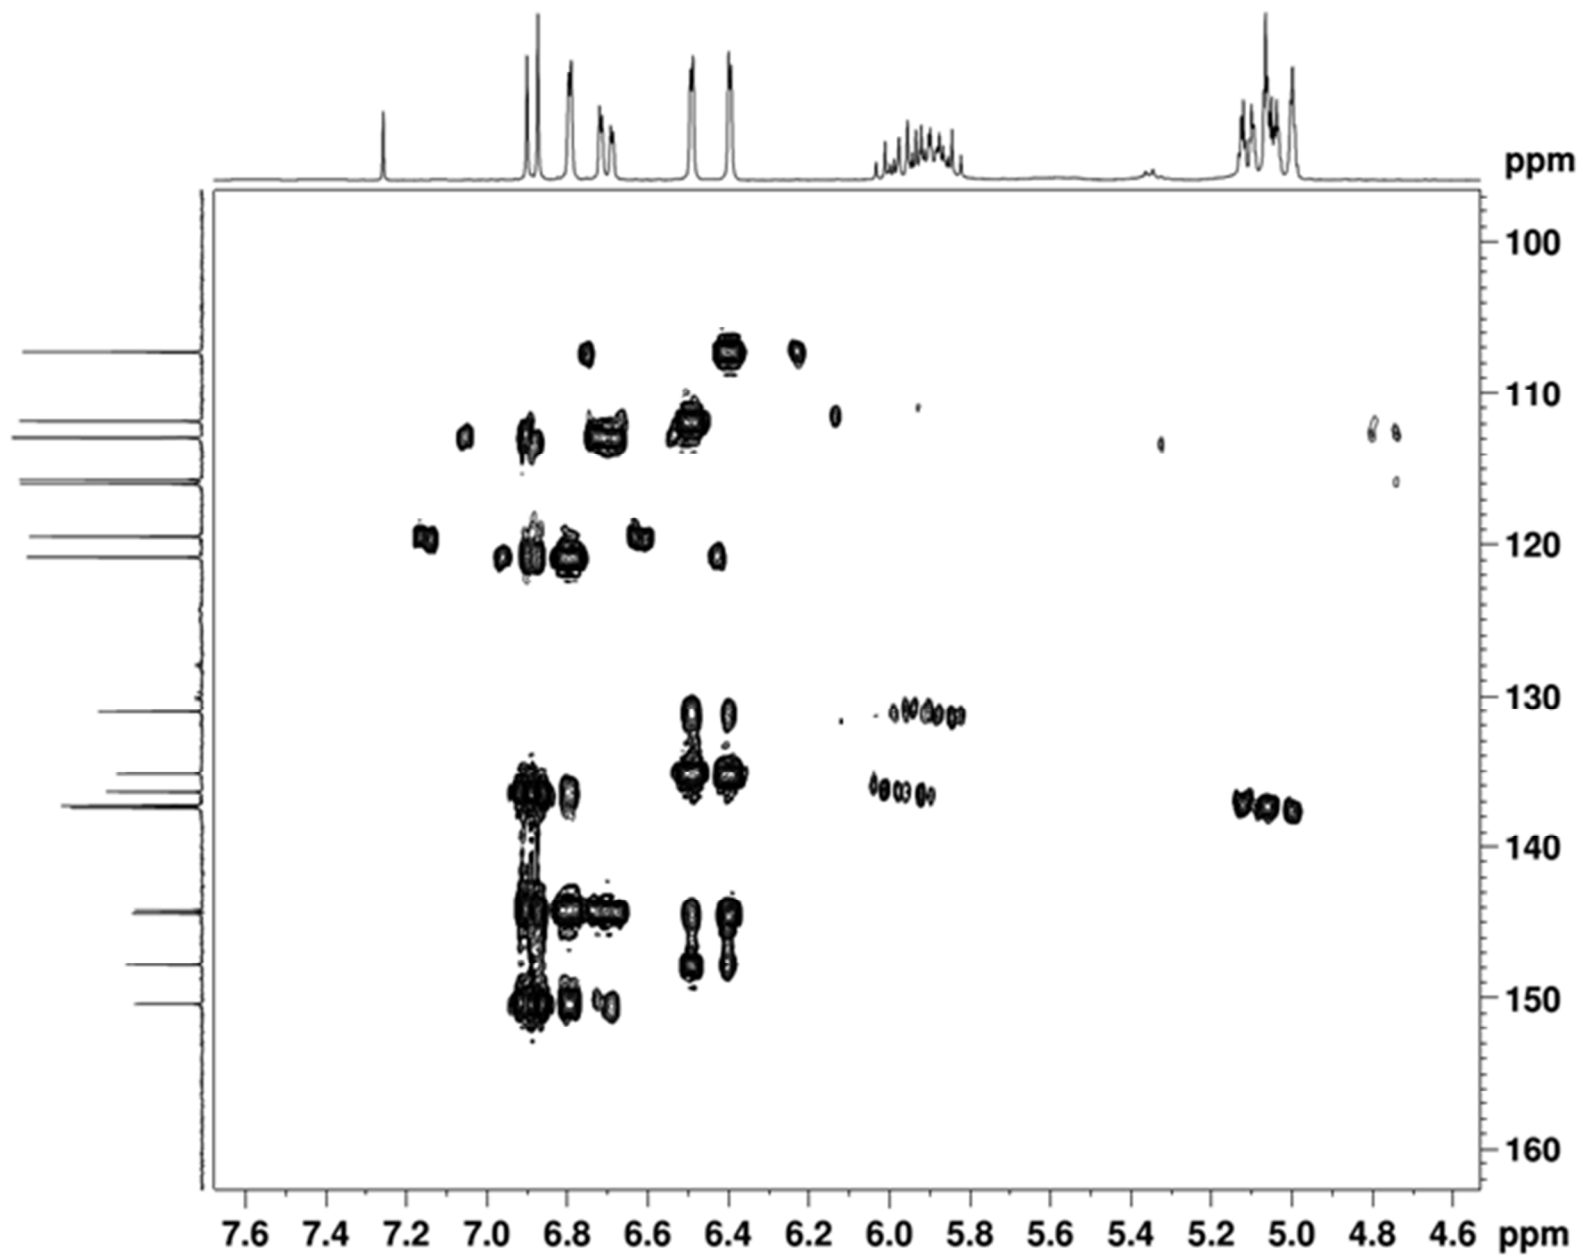

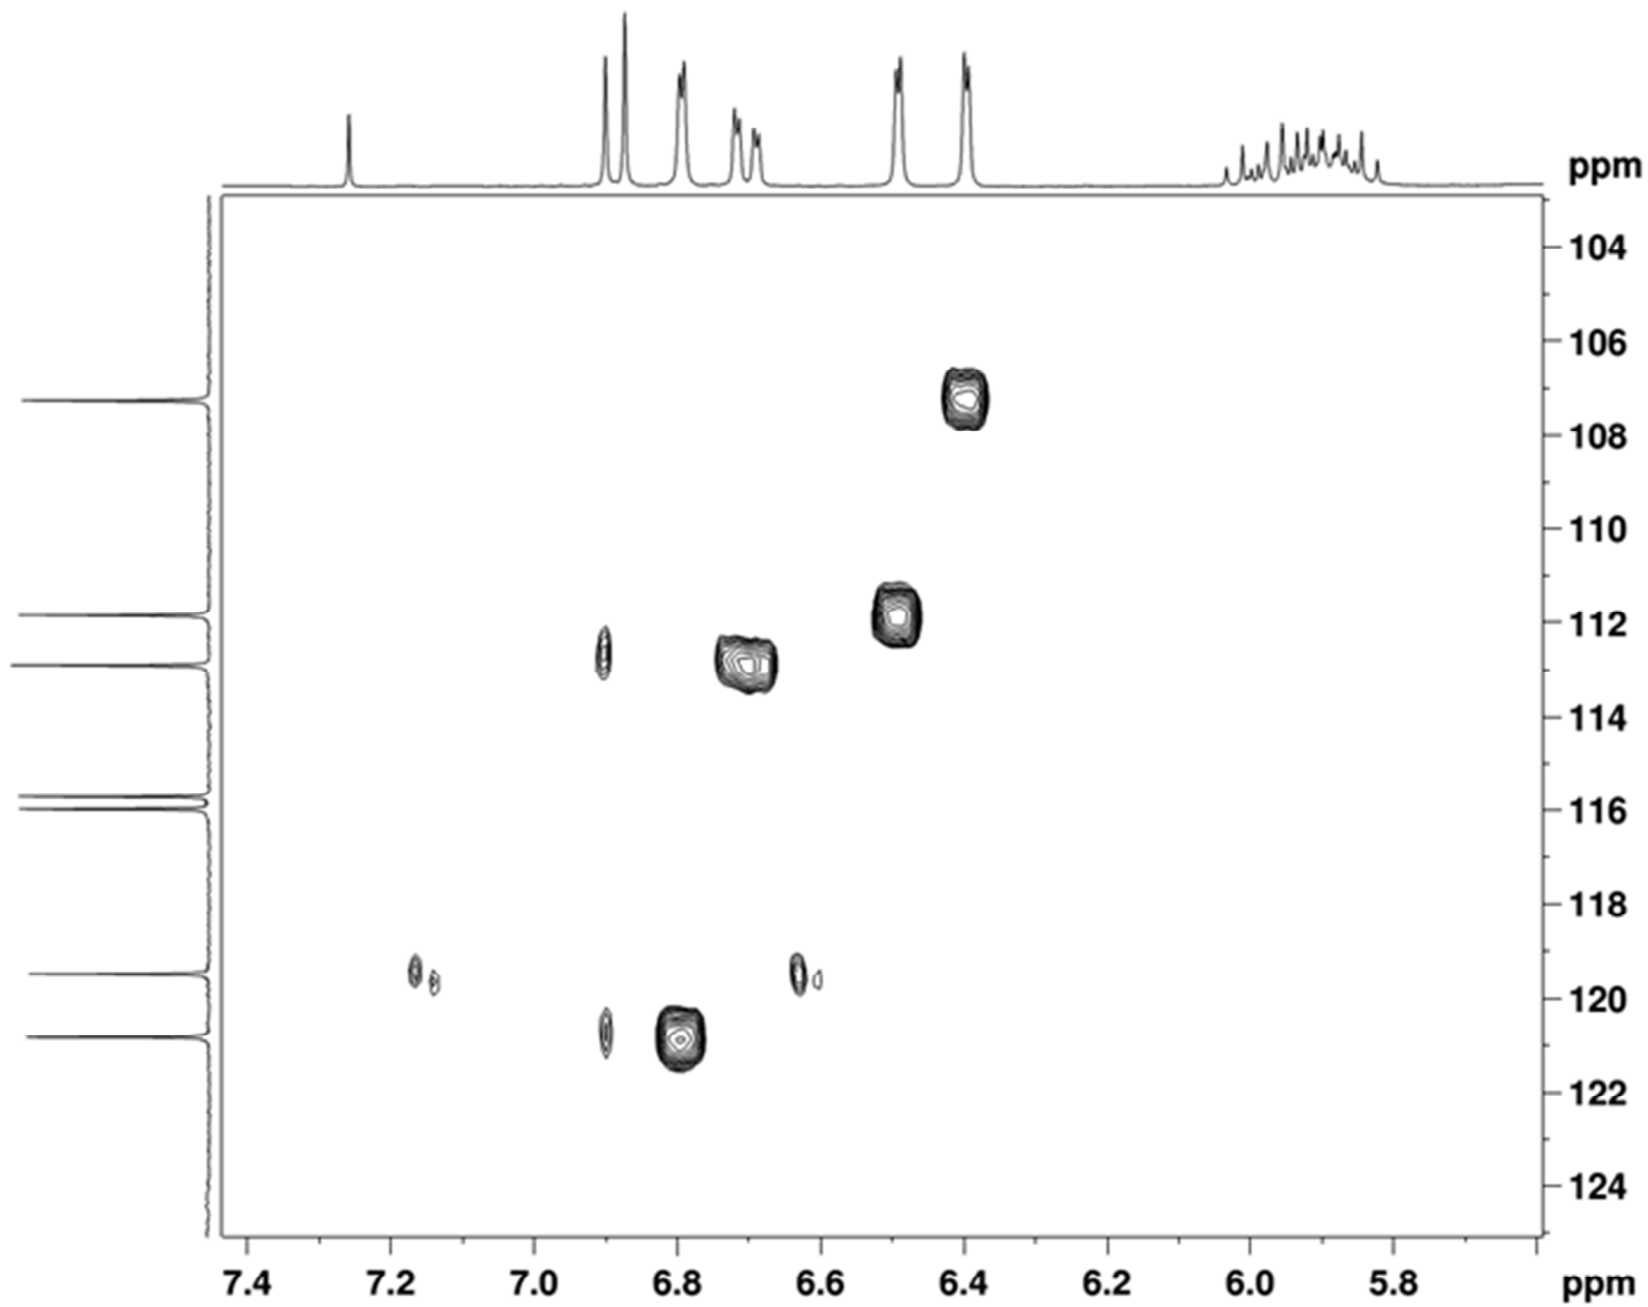

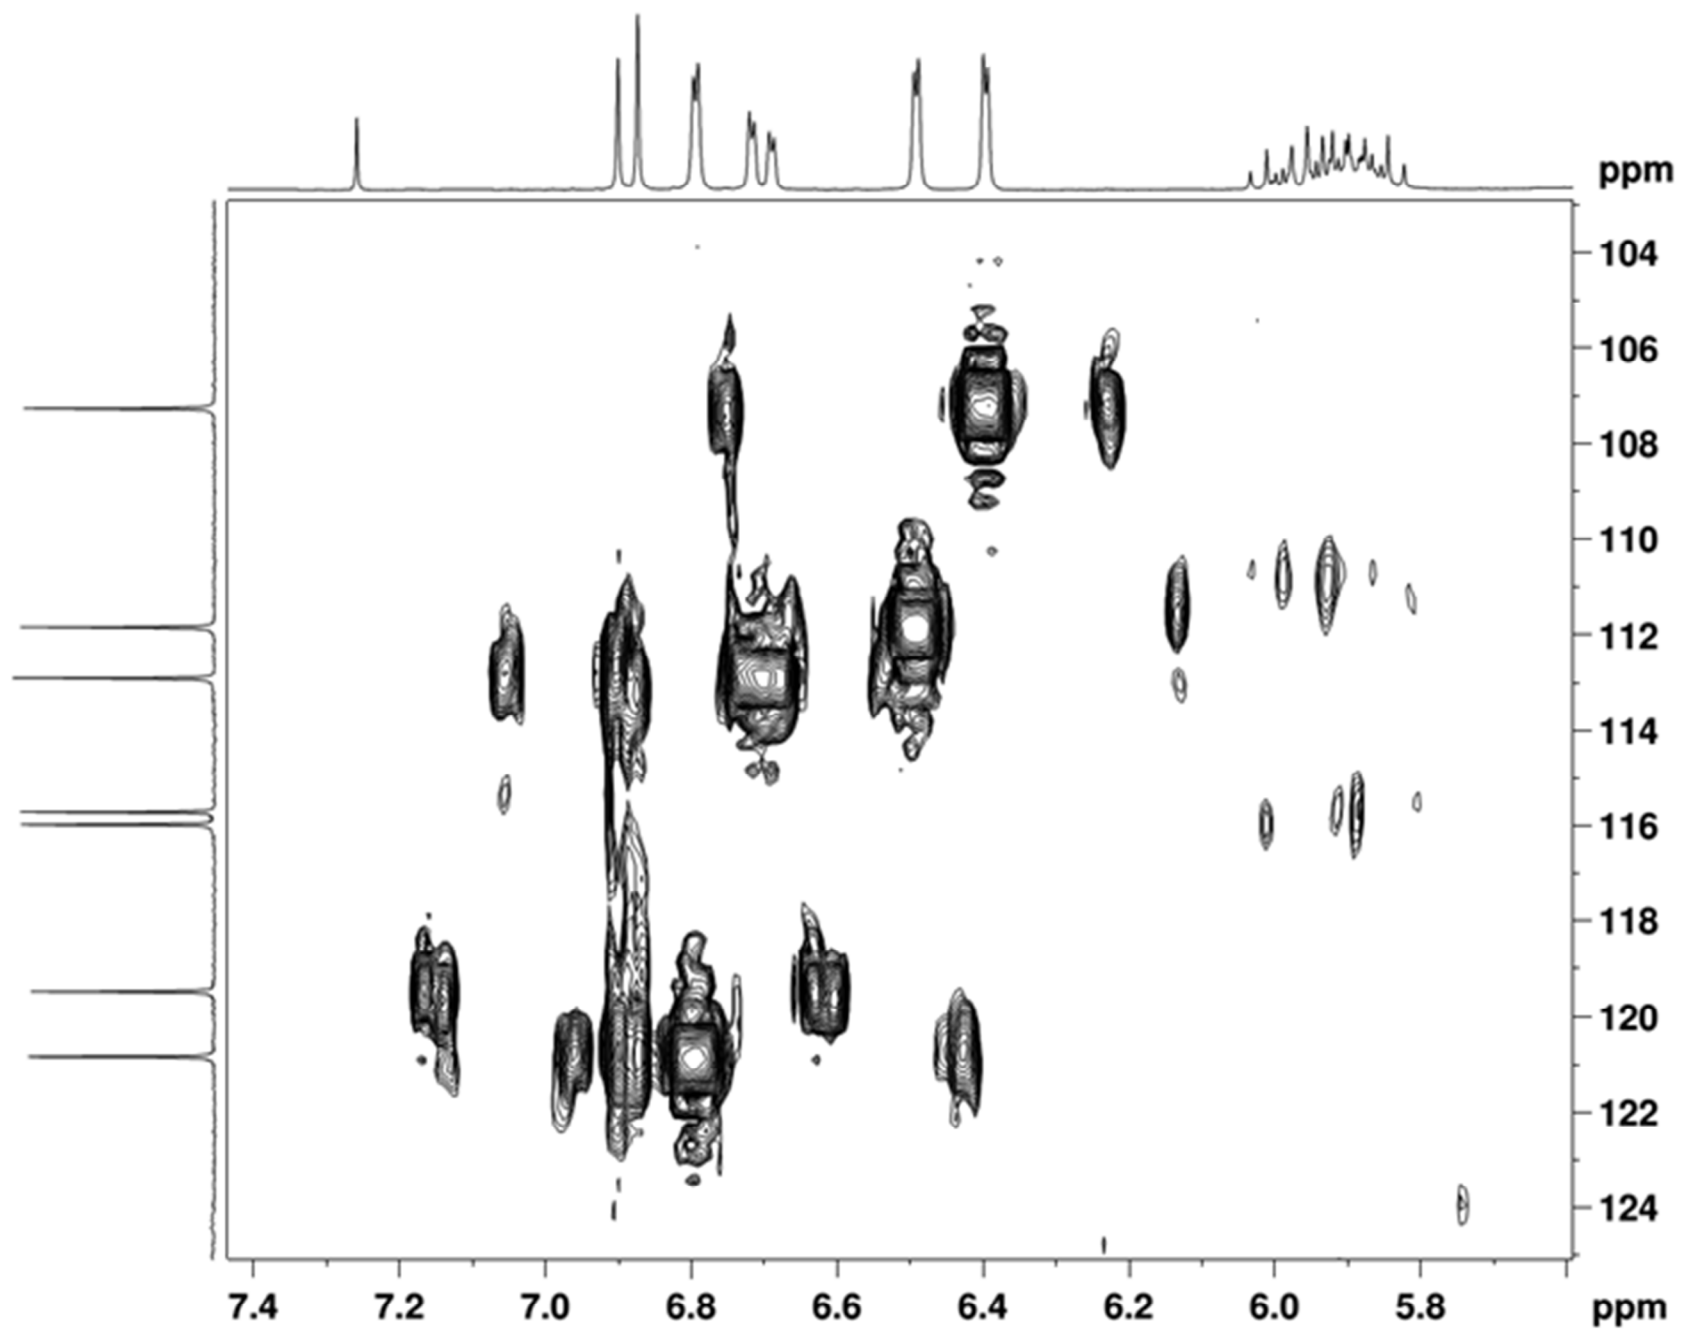

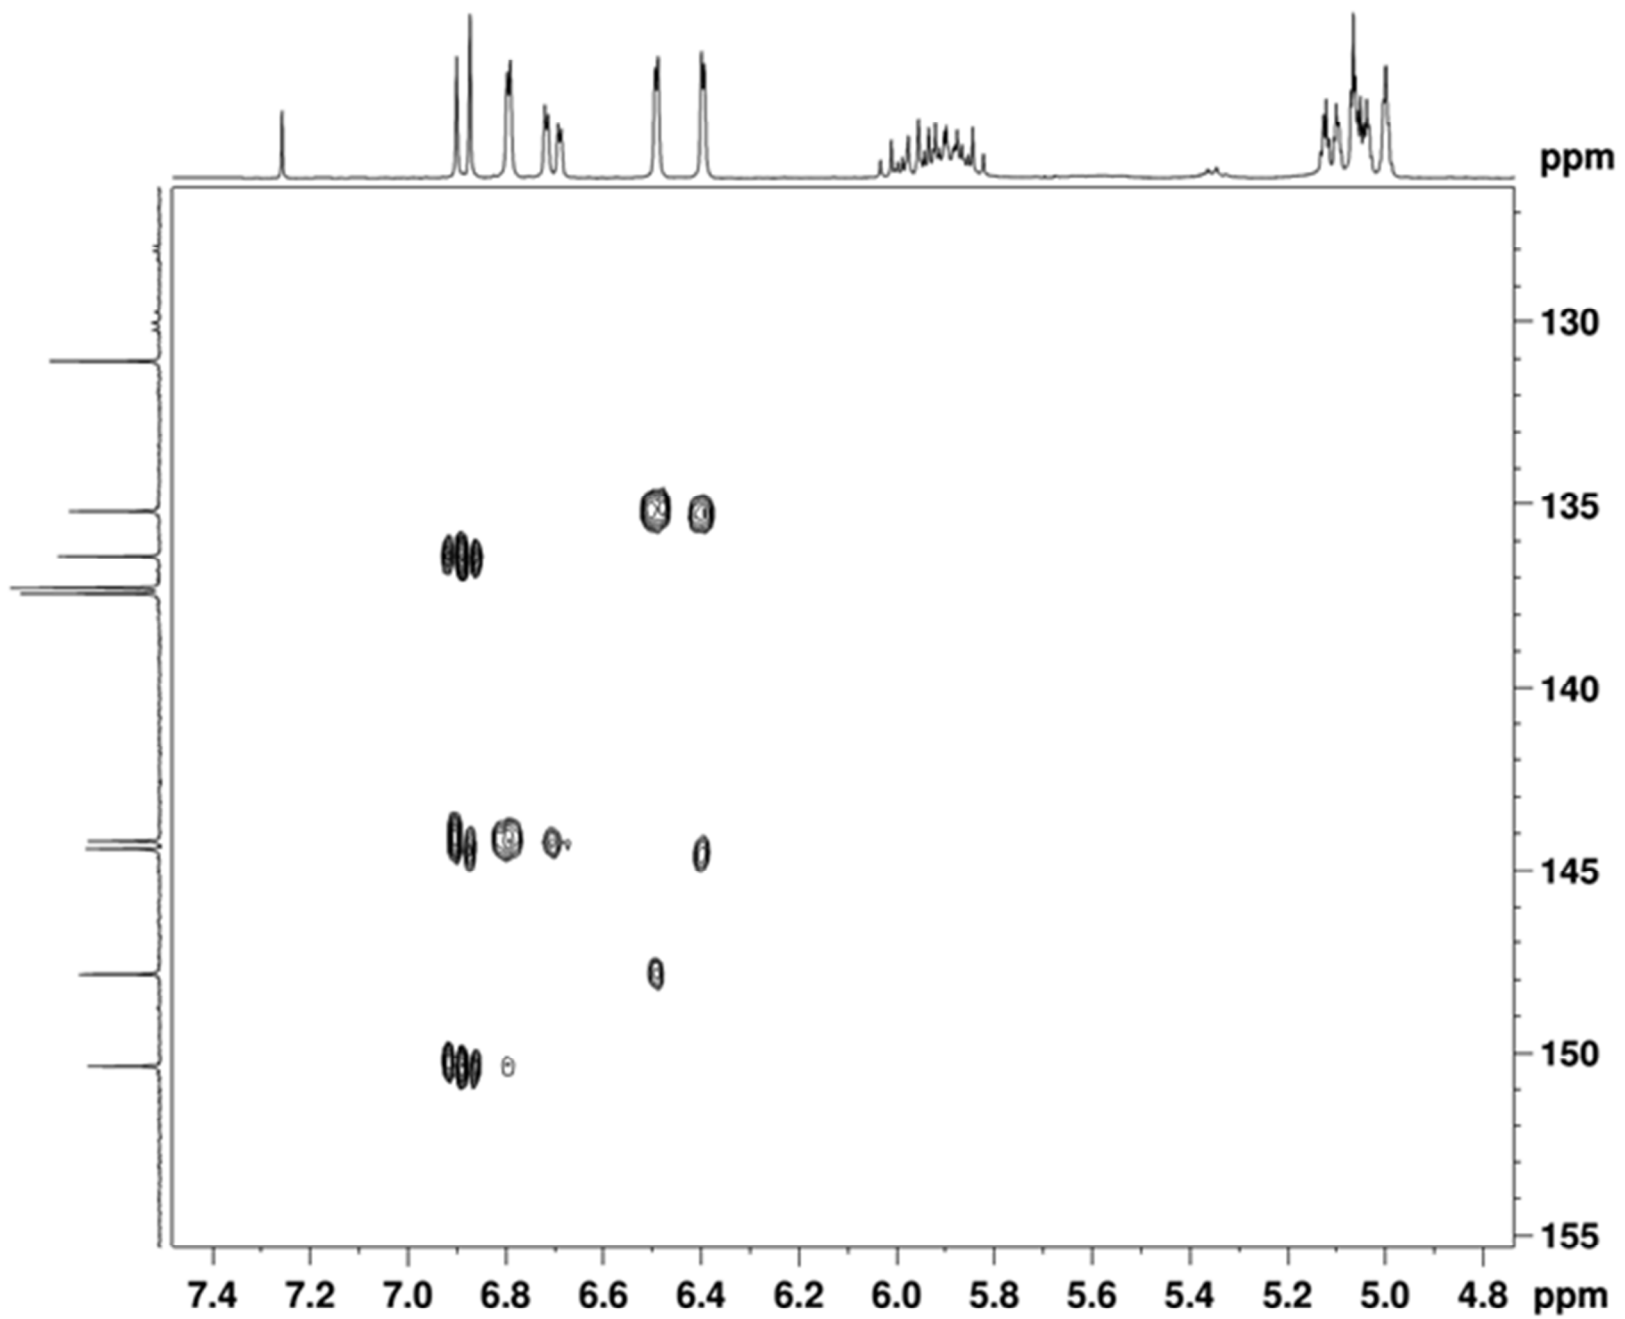

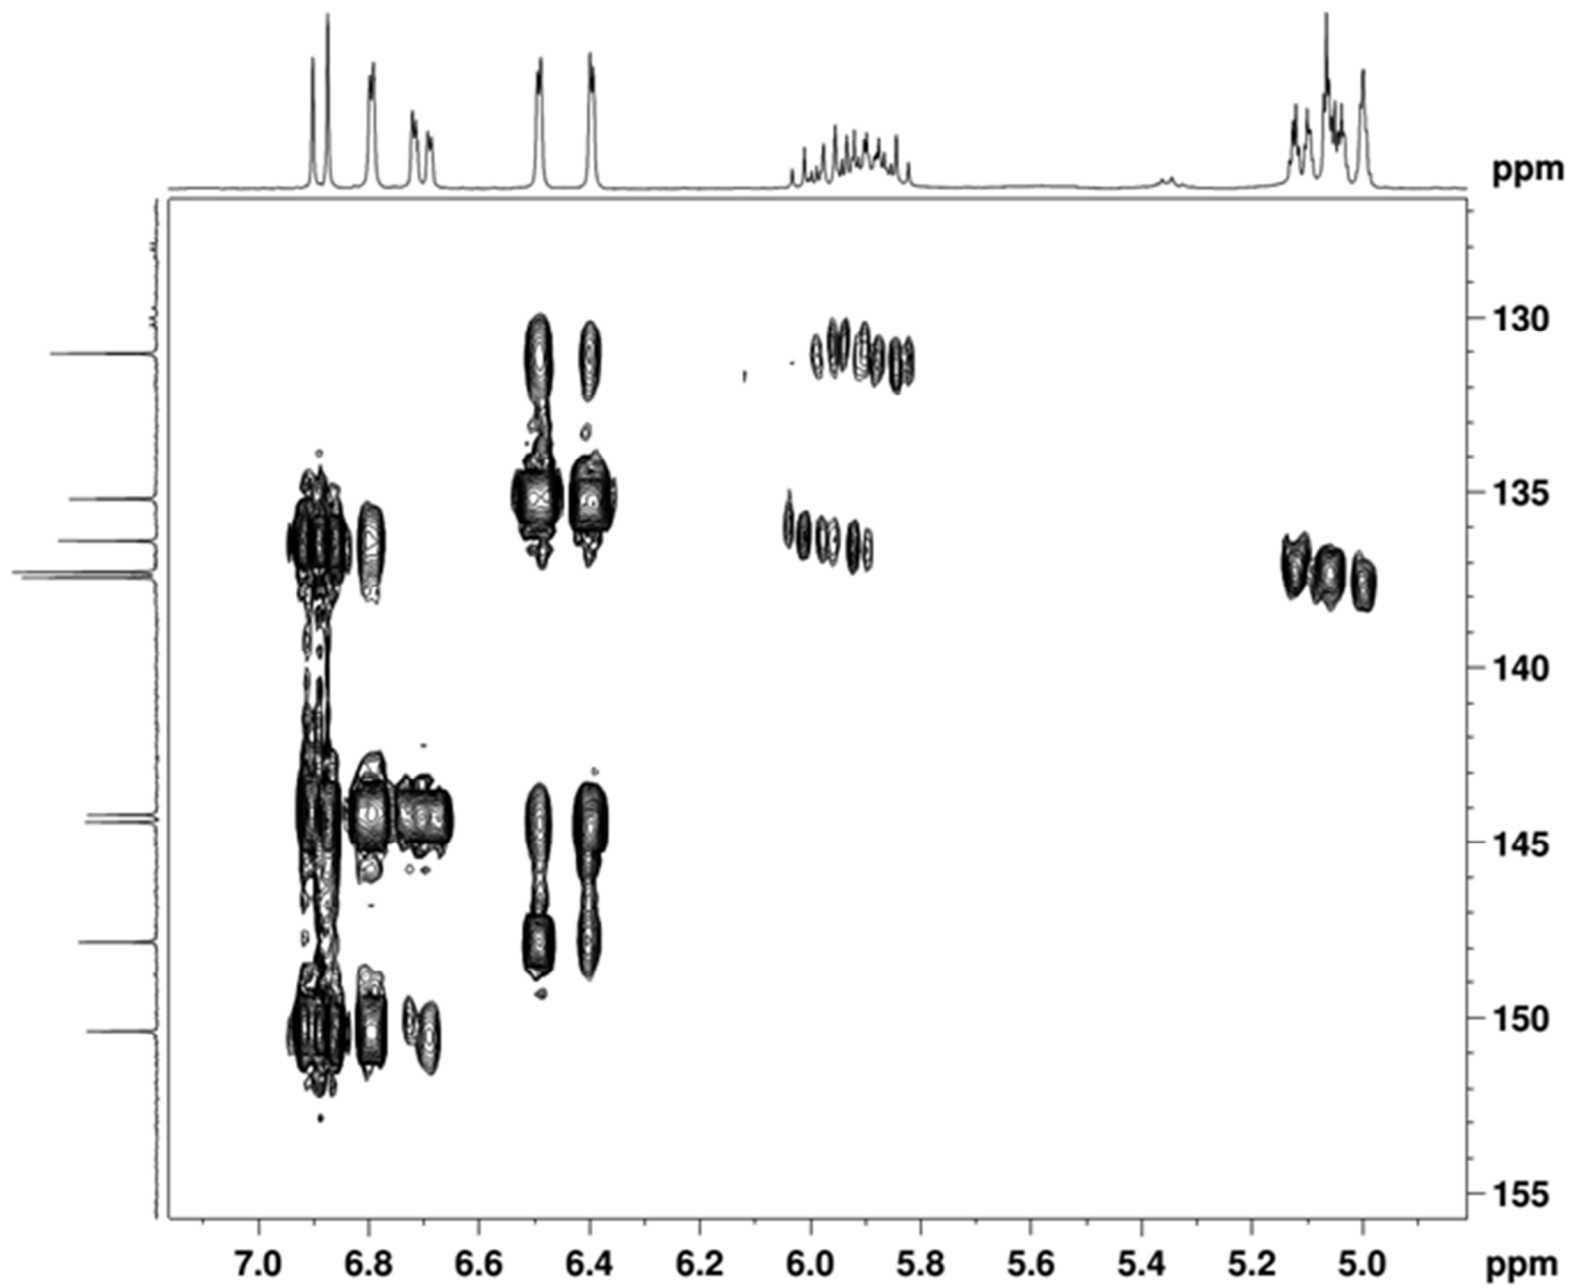

## **COMPOUND 1**

HSQC NMR spectrum ( $\delta$ , CDCl<sub>3</sub>, 300 and 75 MHz)

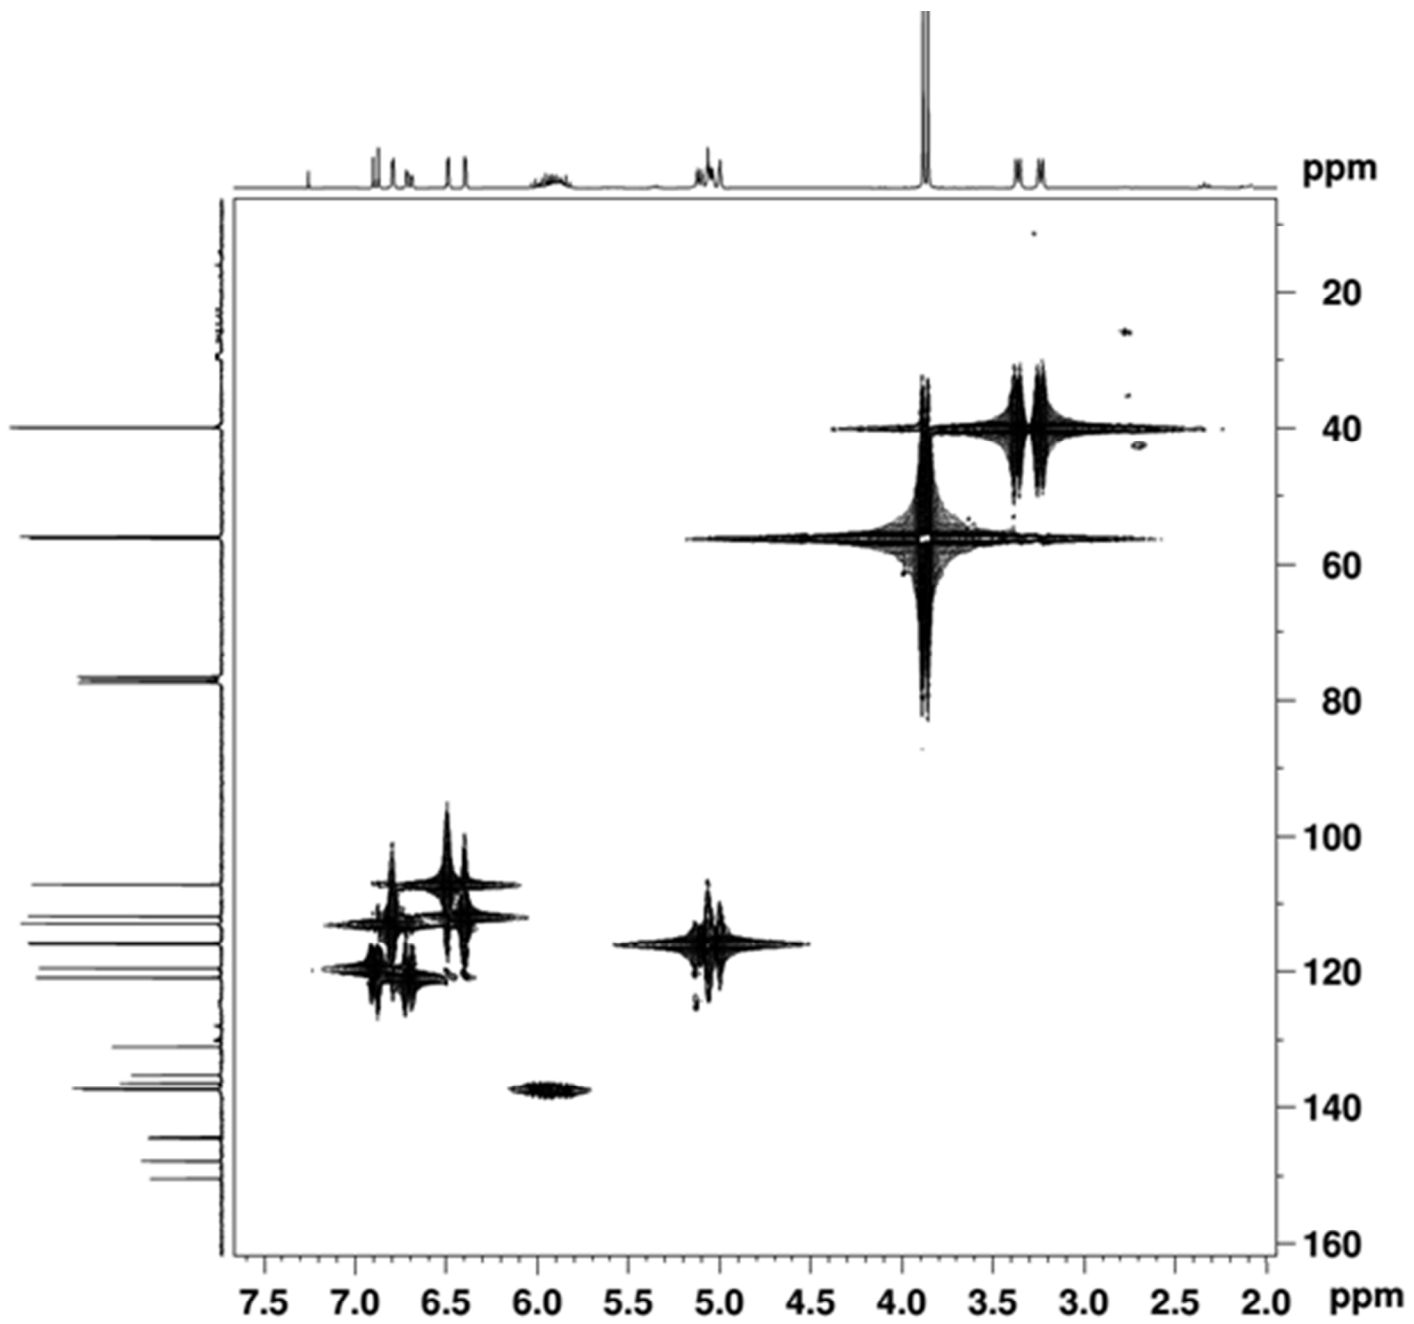



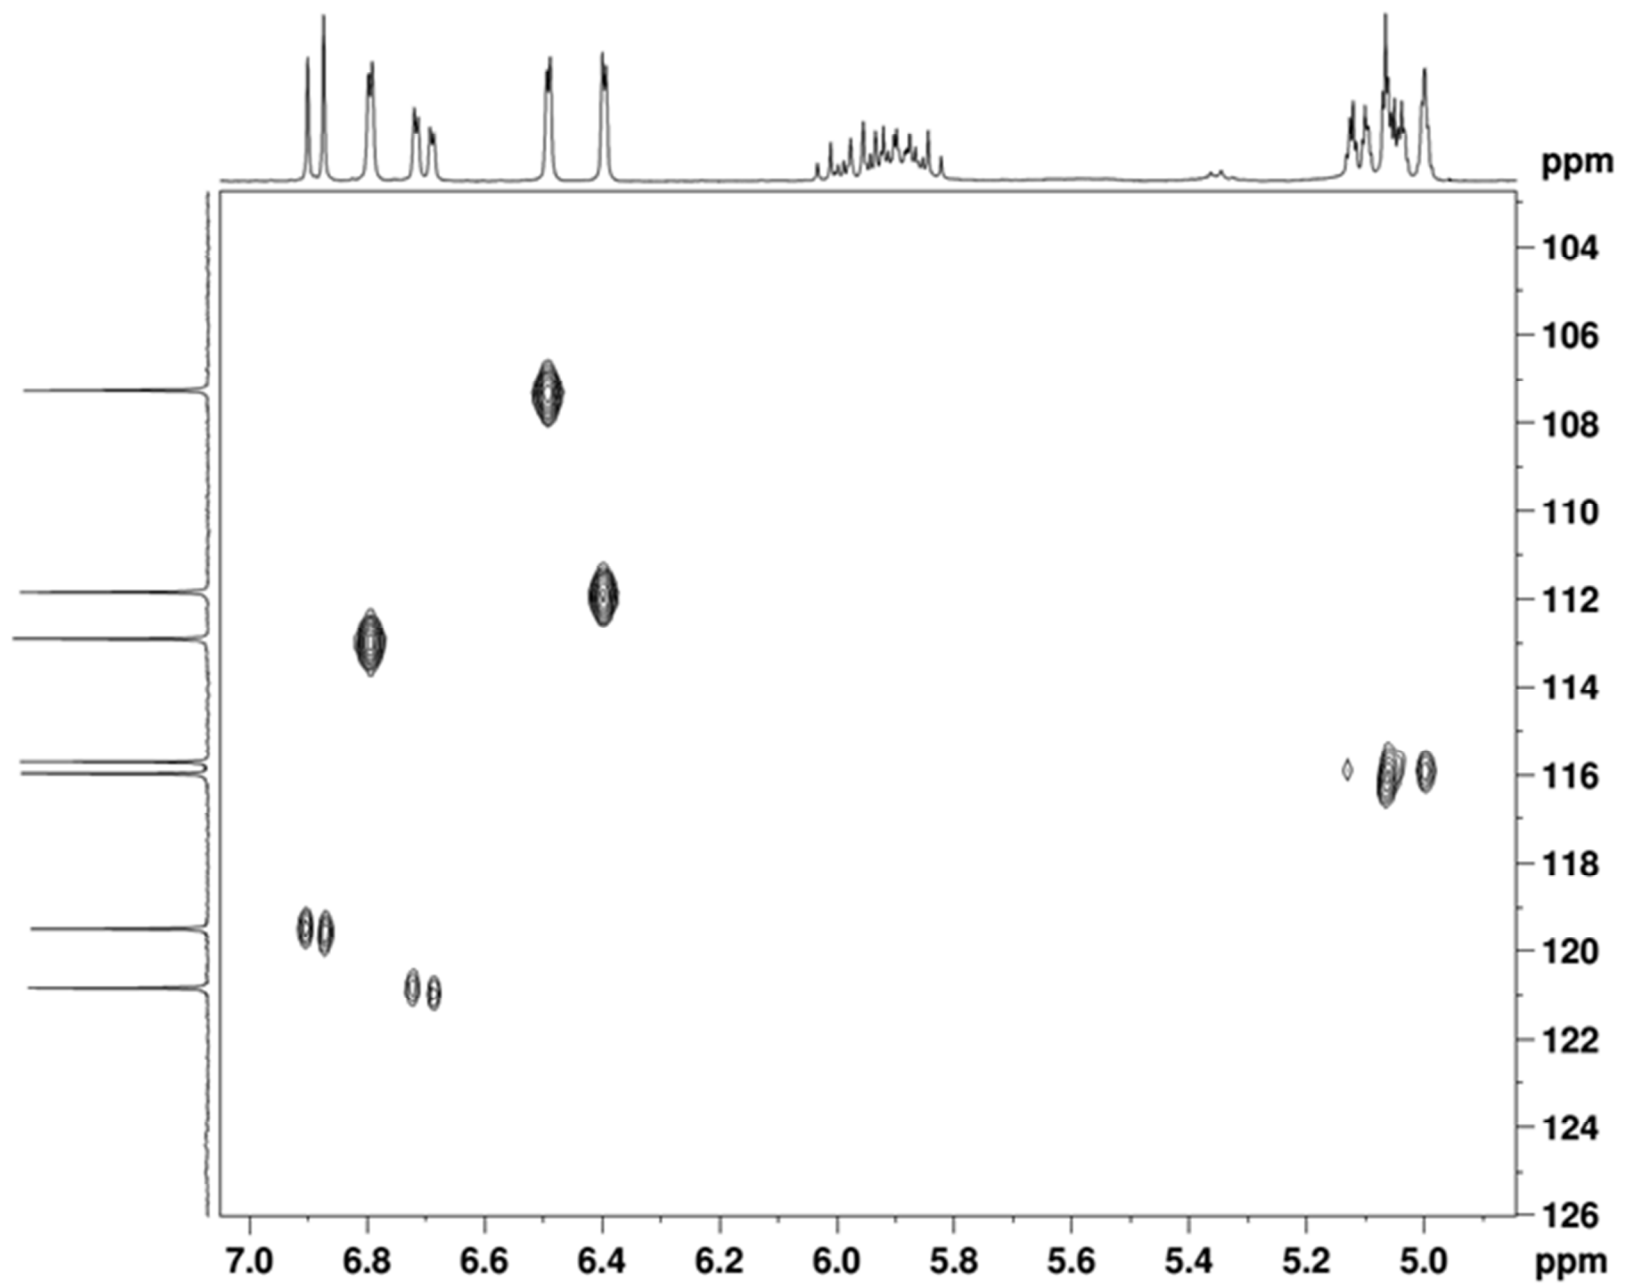

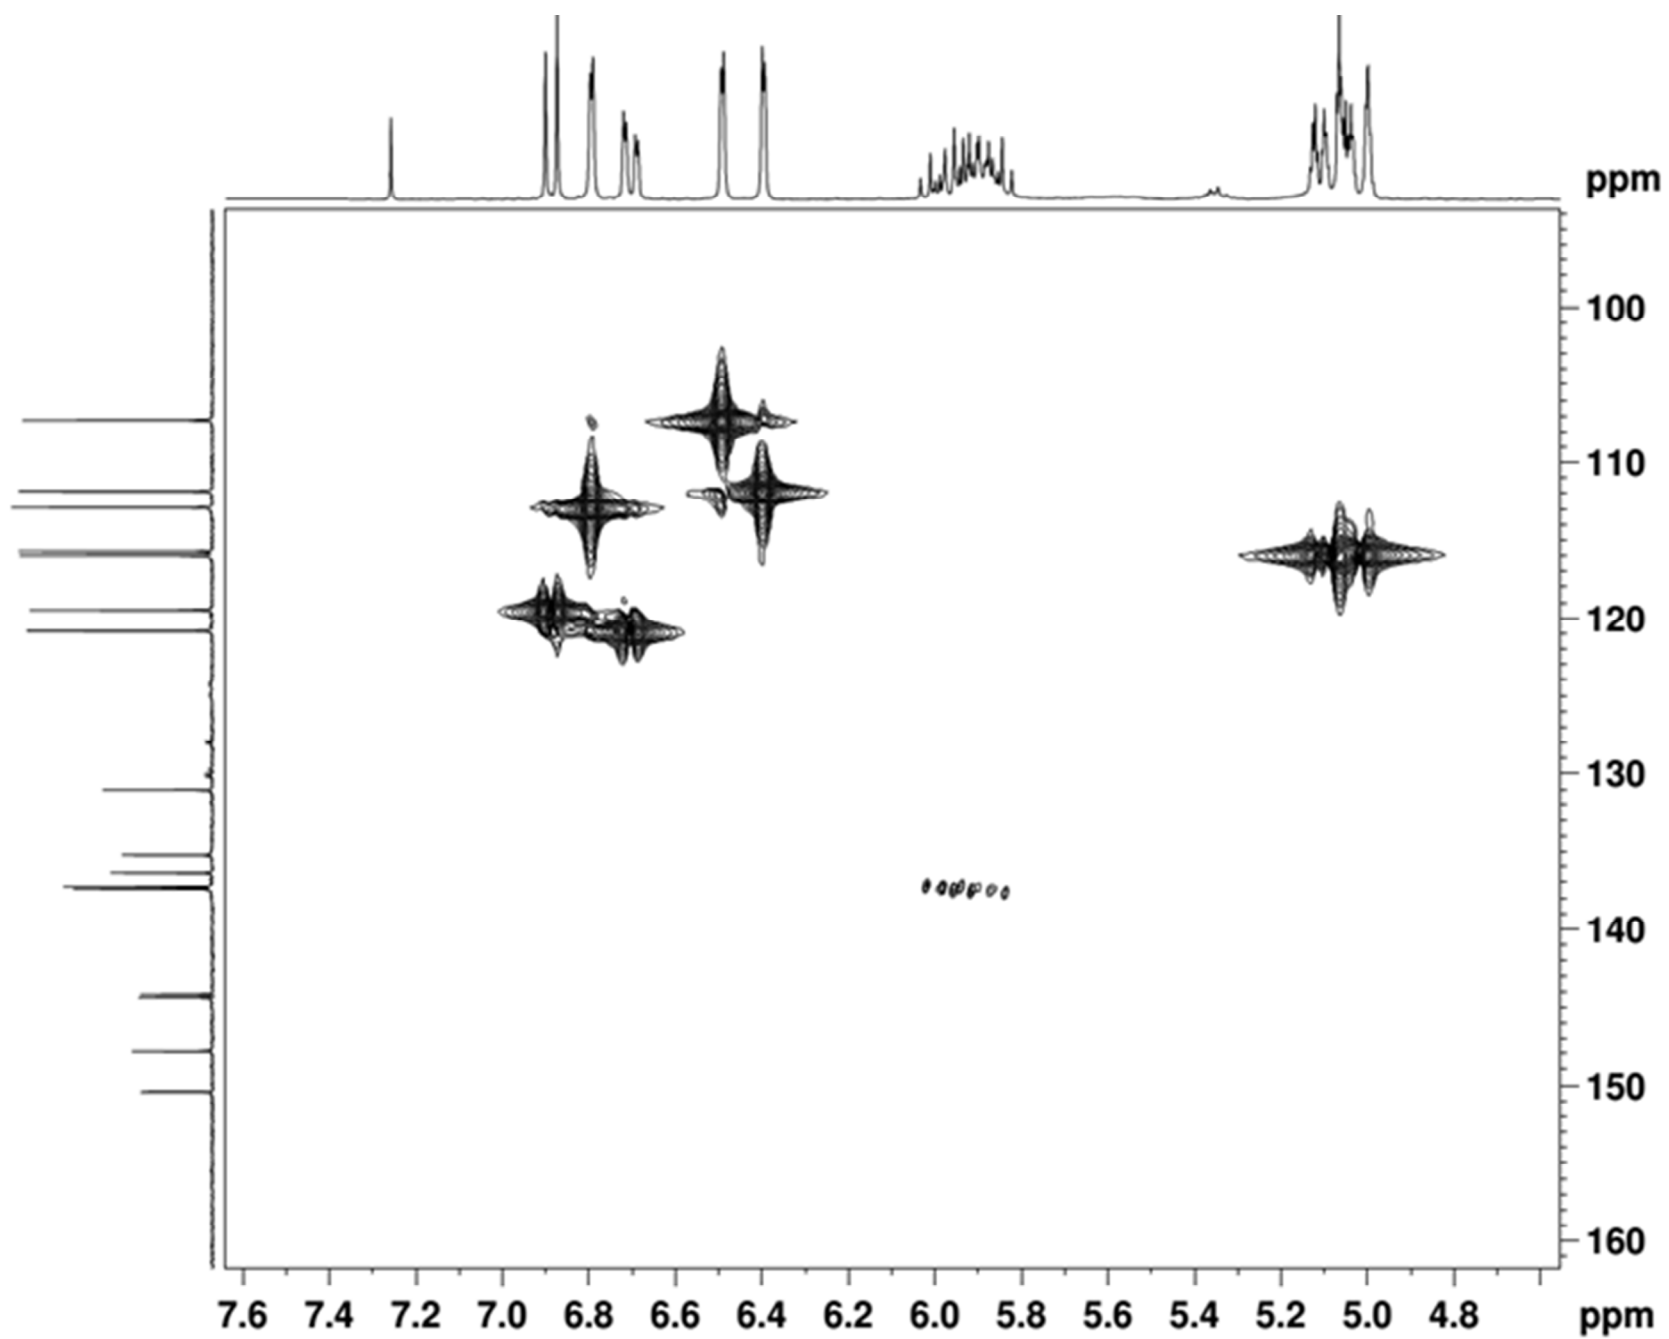

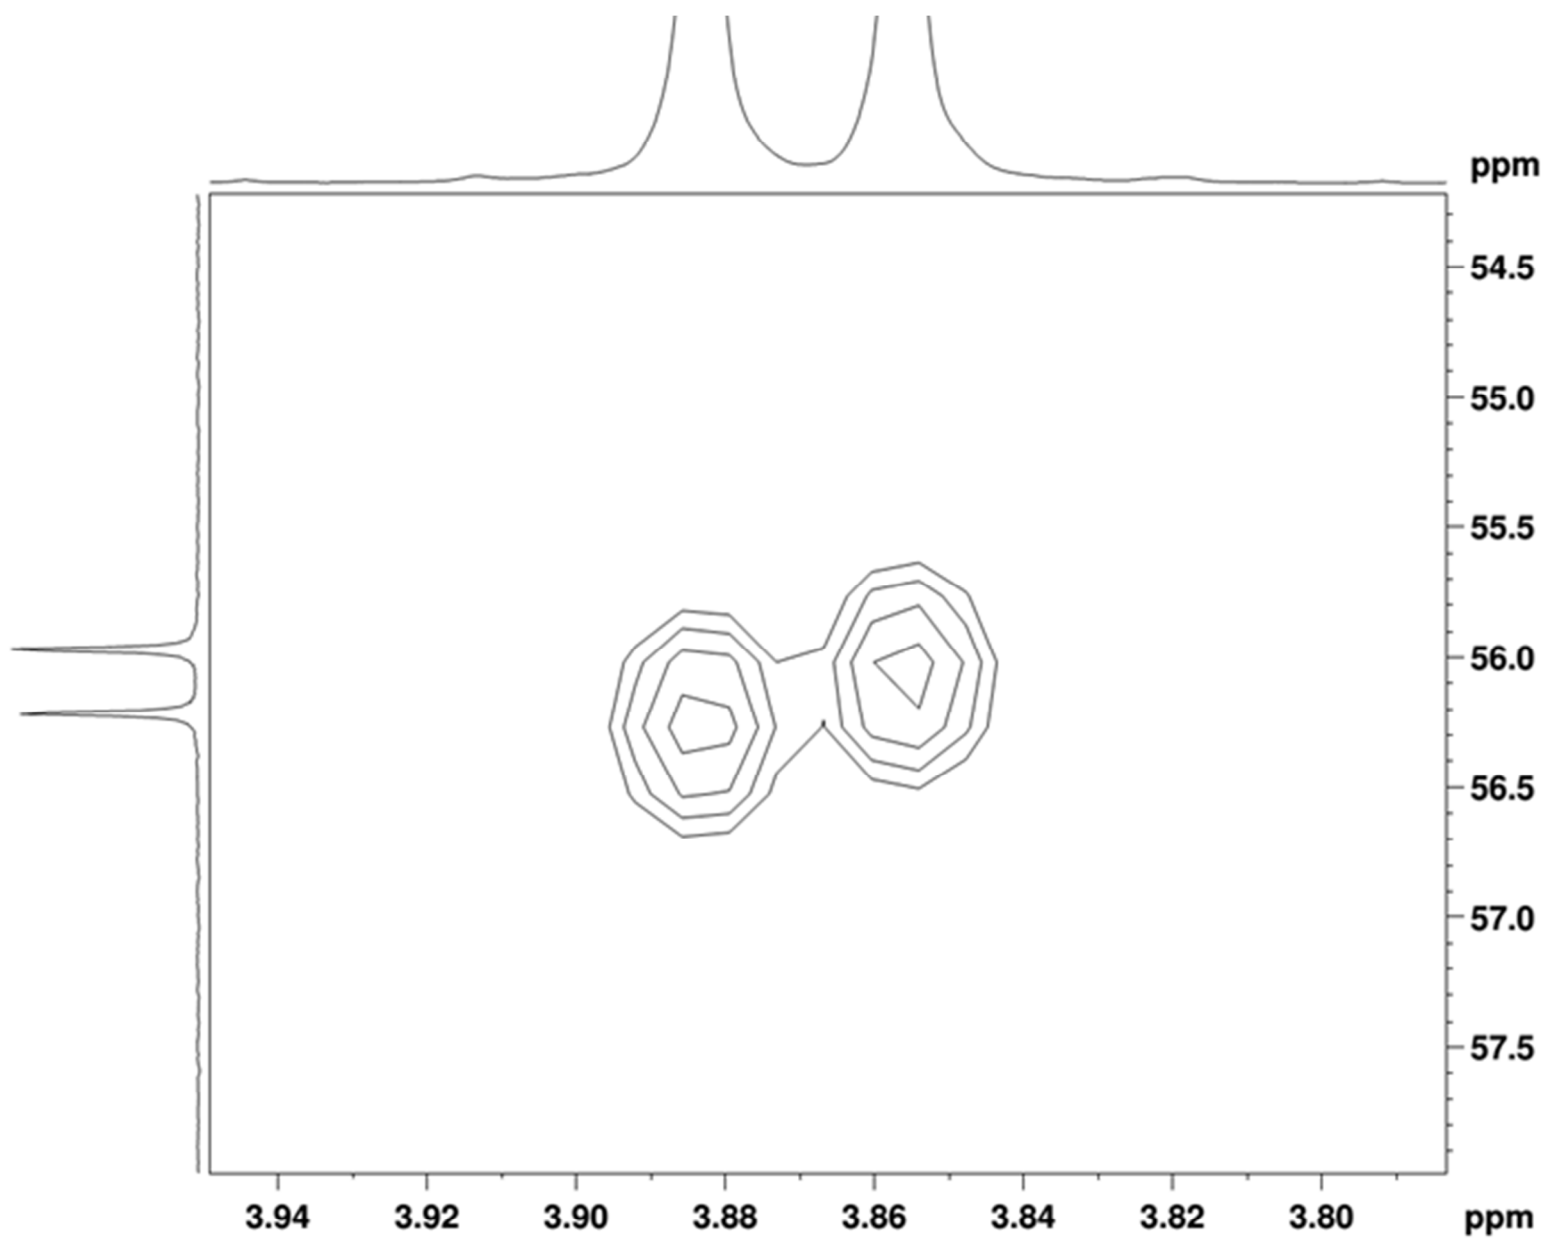

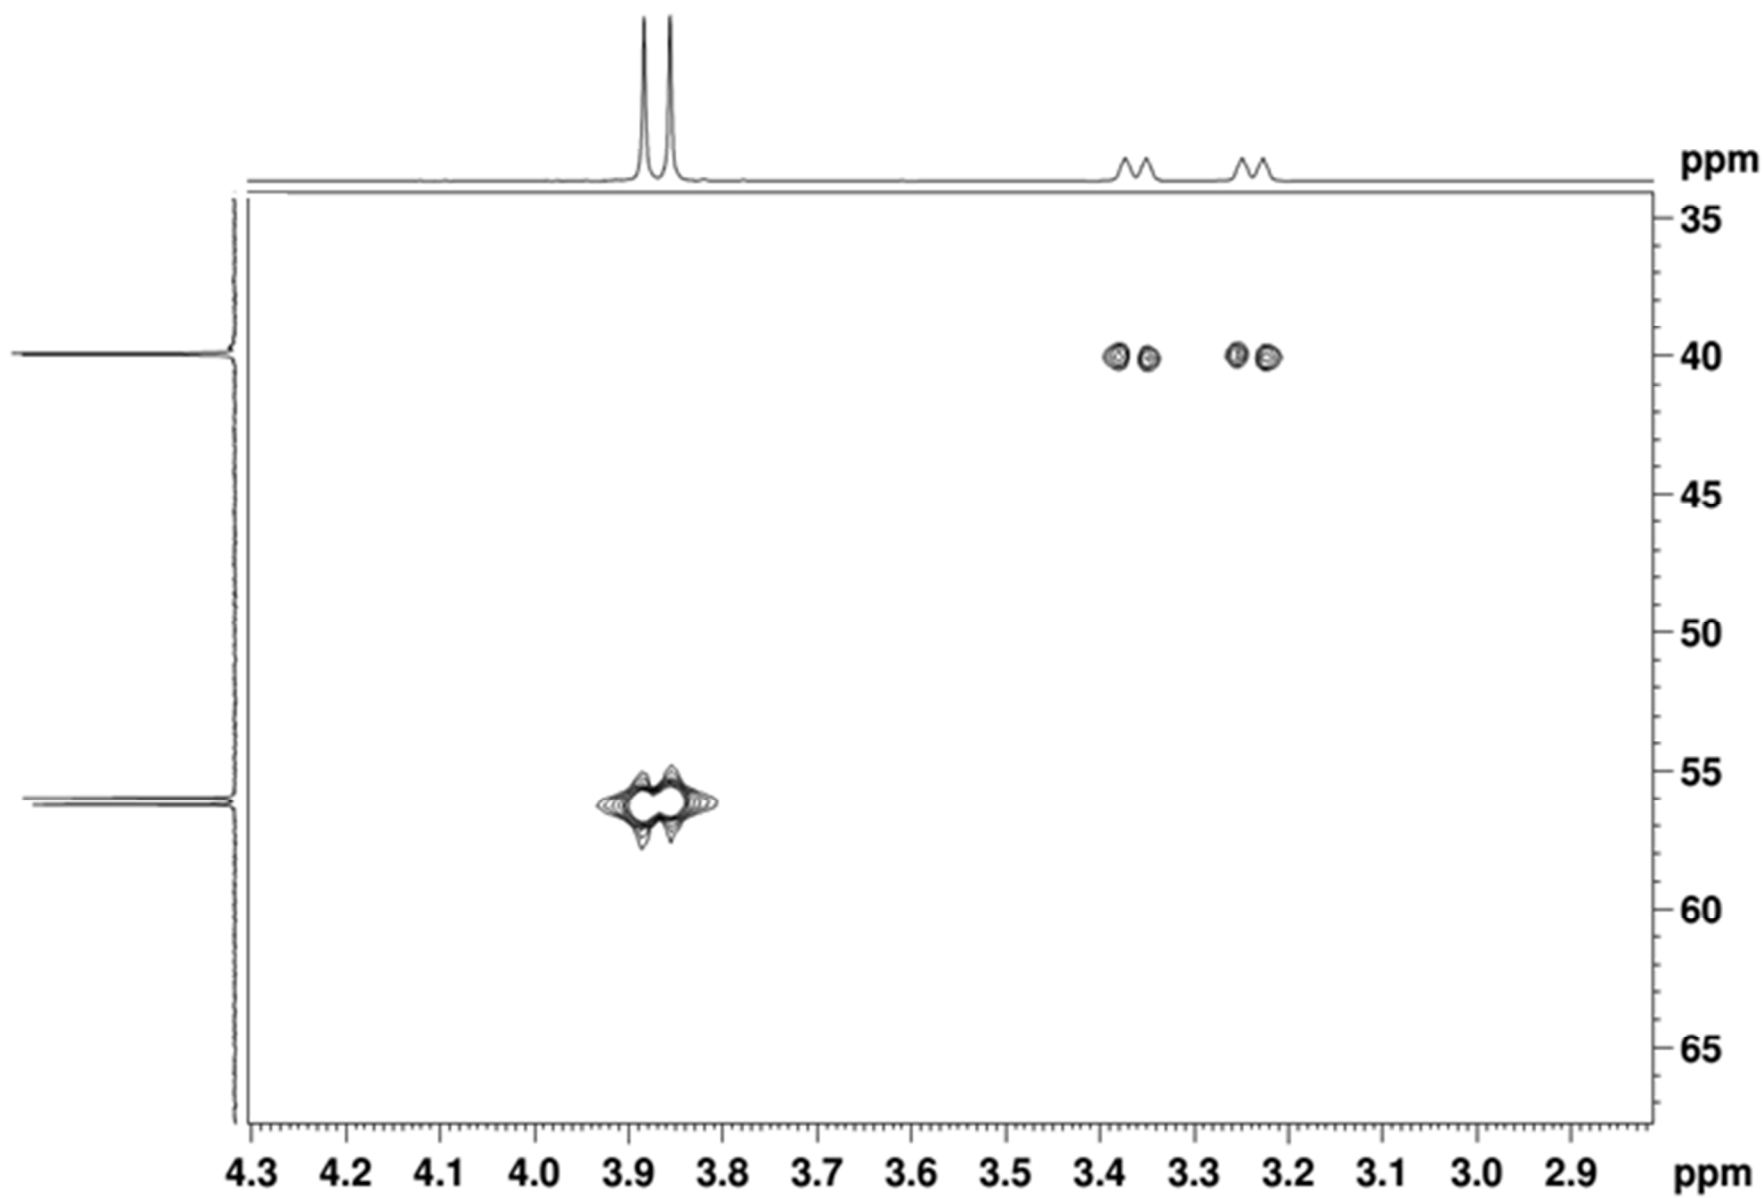

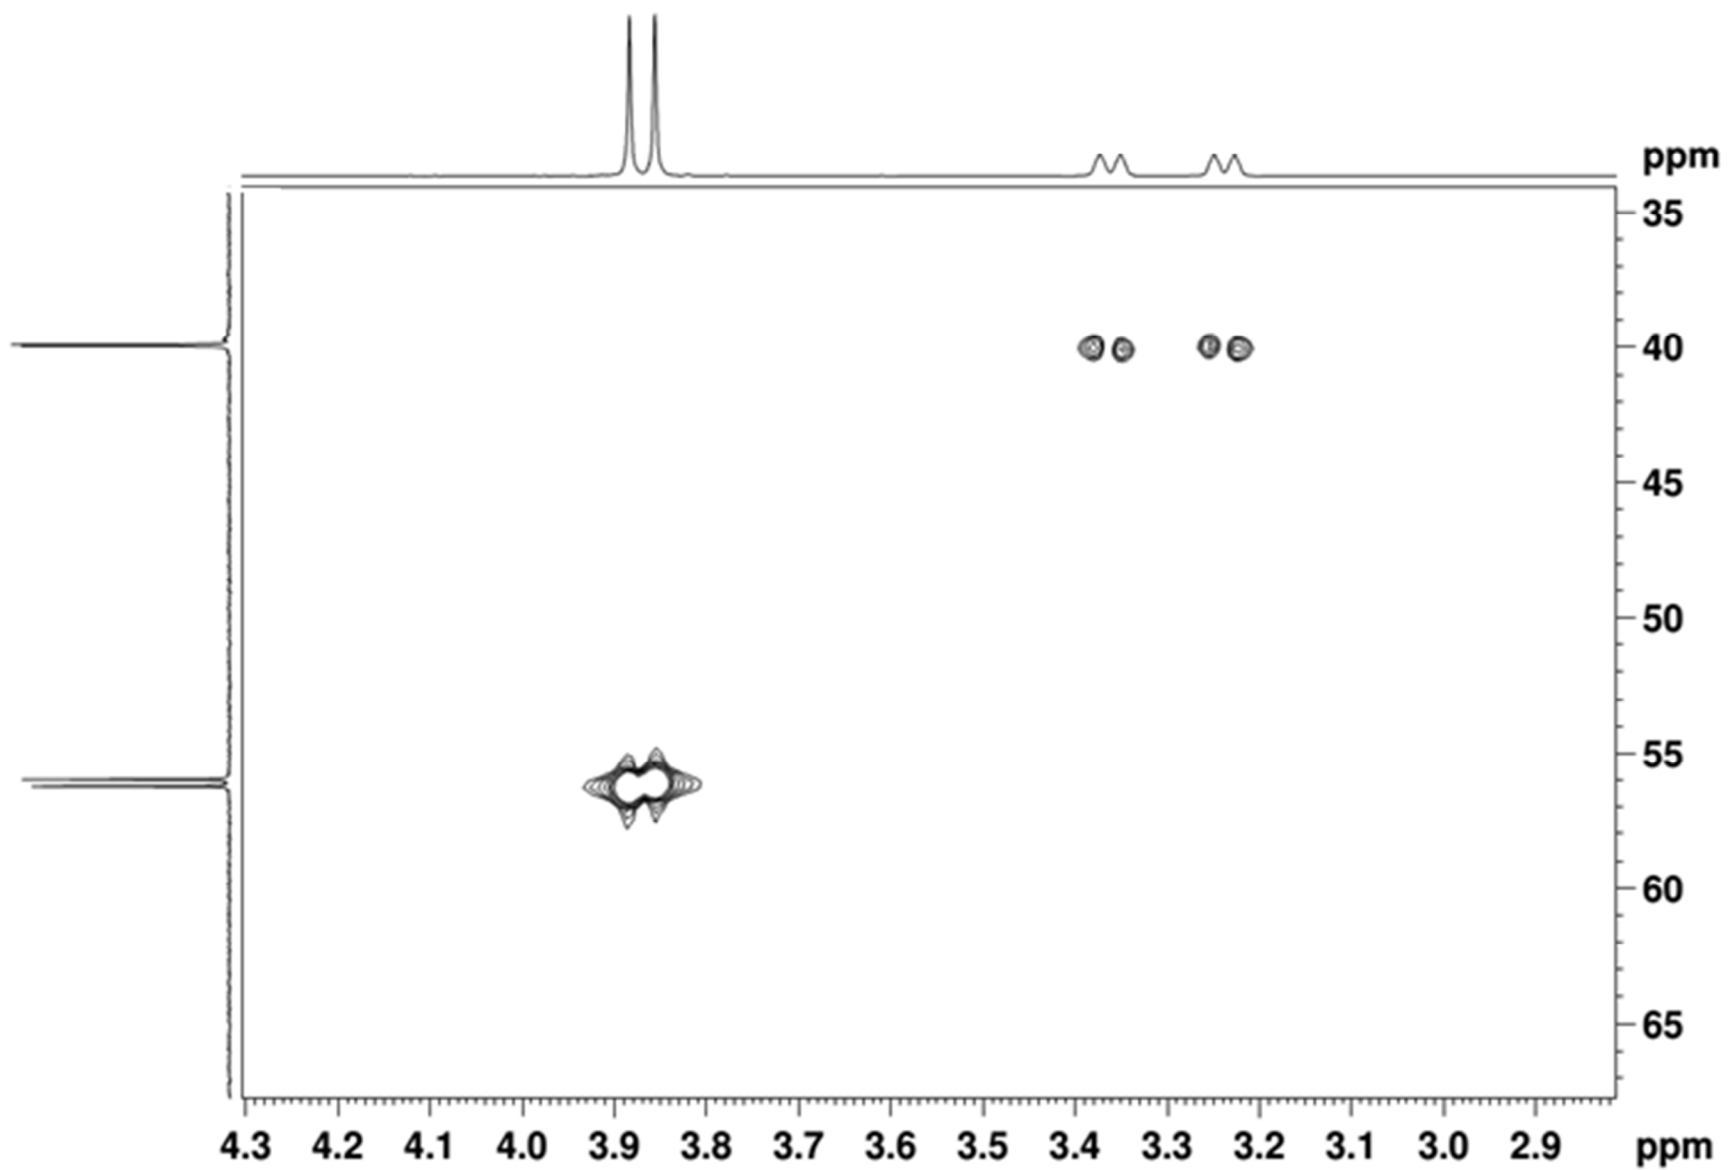

# COMPOUND 1

## MASS SPECTRUM

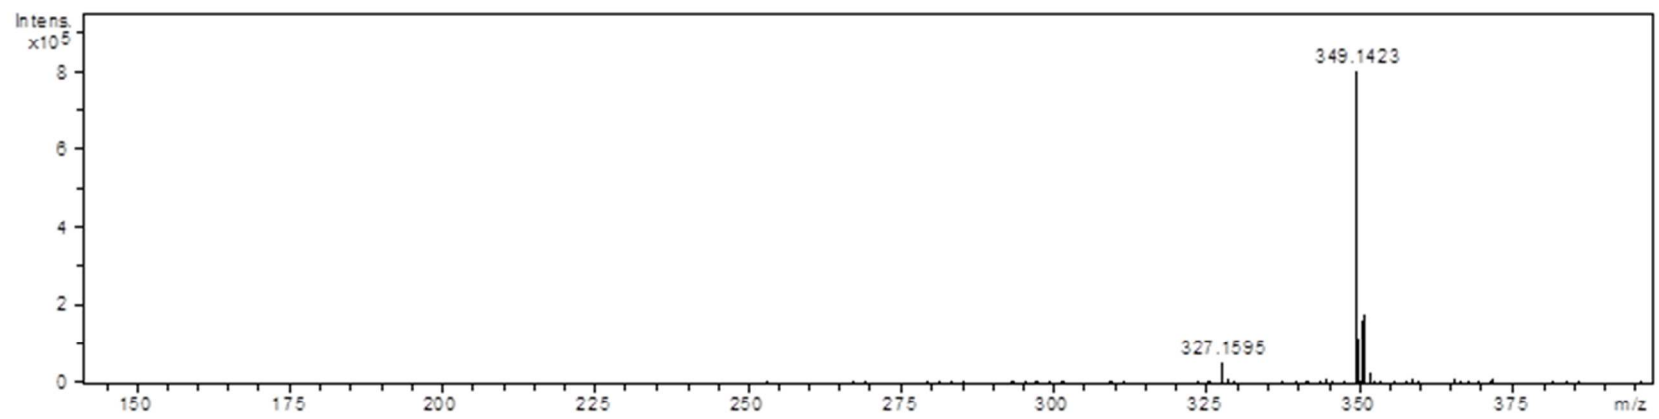

## COMPOUND 2

$^1\text{H}$  NMR spectrum ( $\delta$ ,  $\text{CDCl}_3$ , 300 MHz)

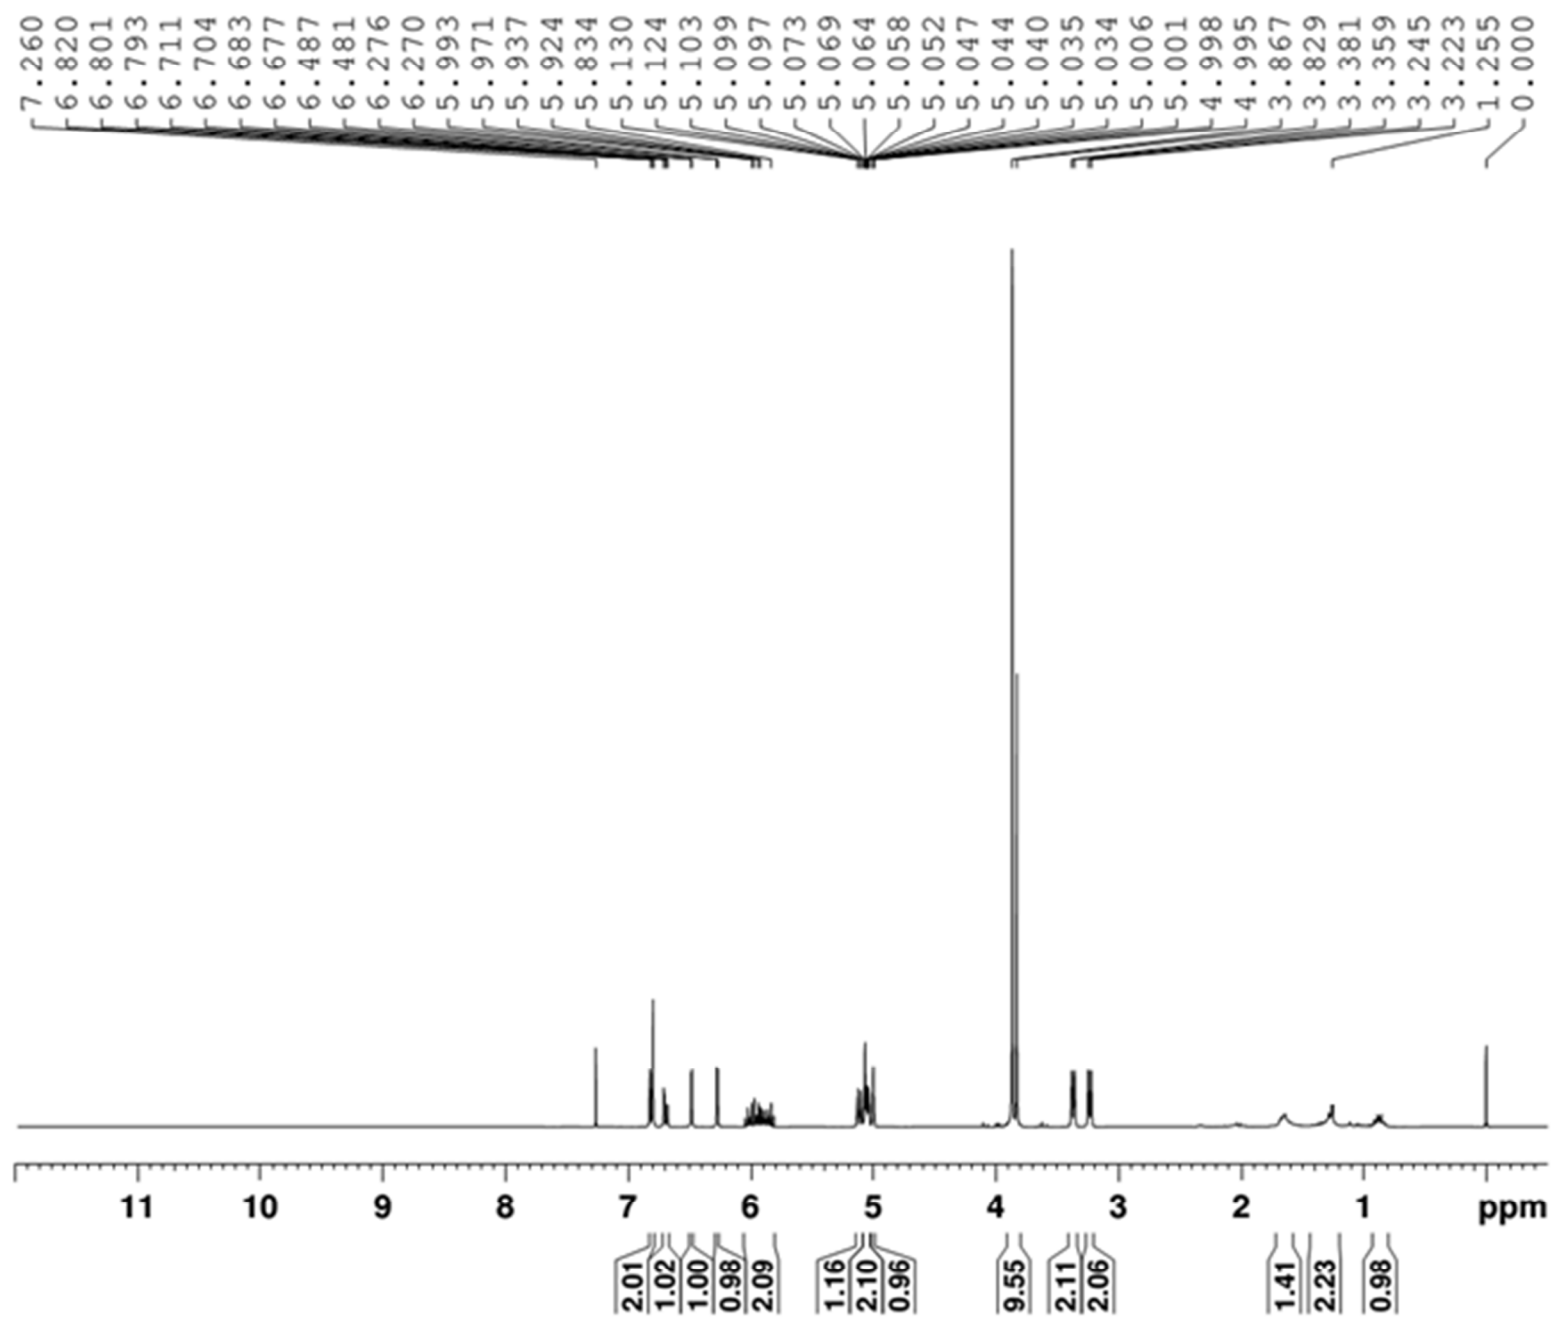



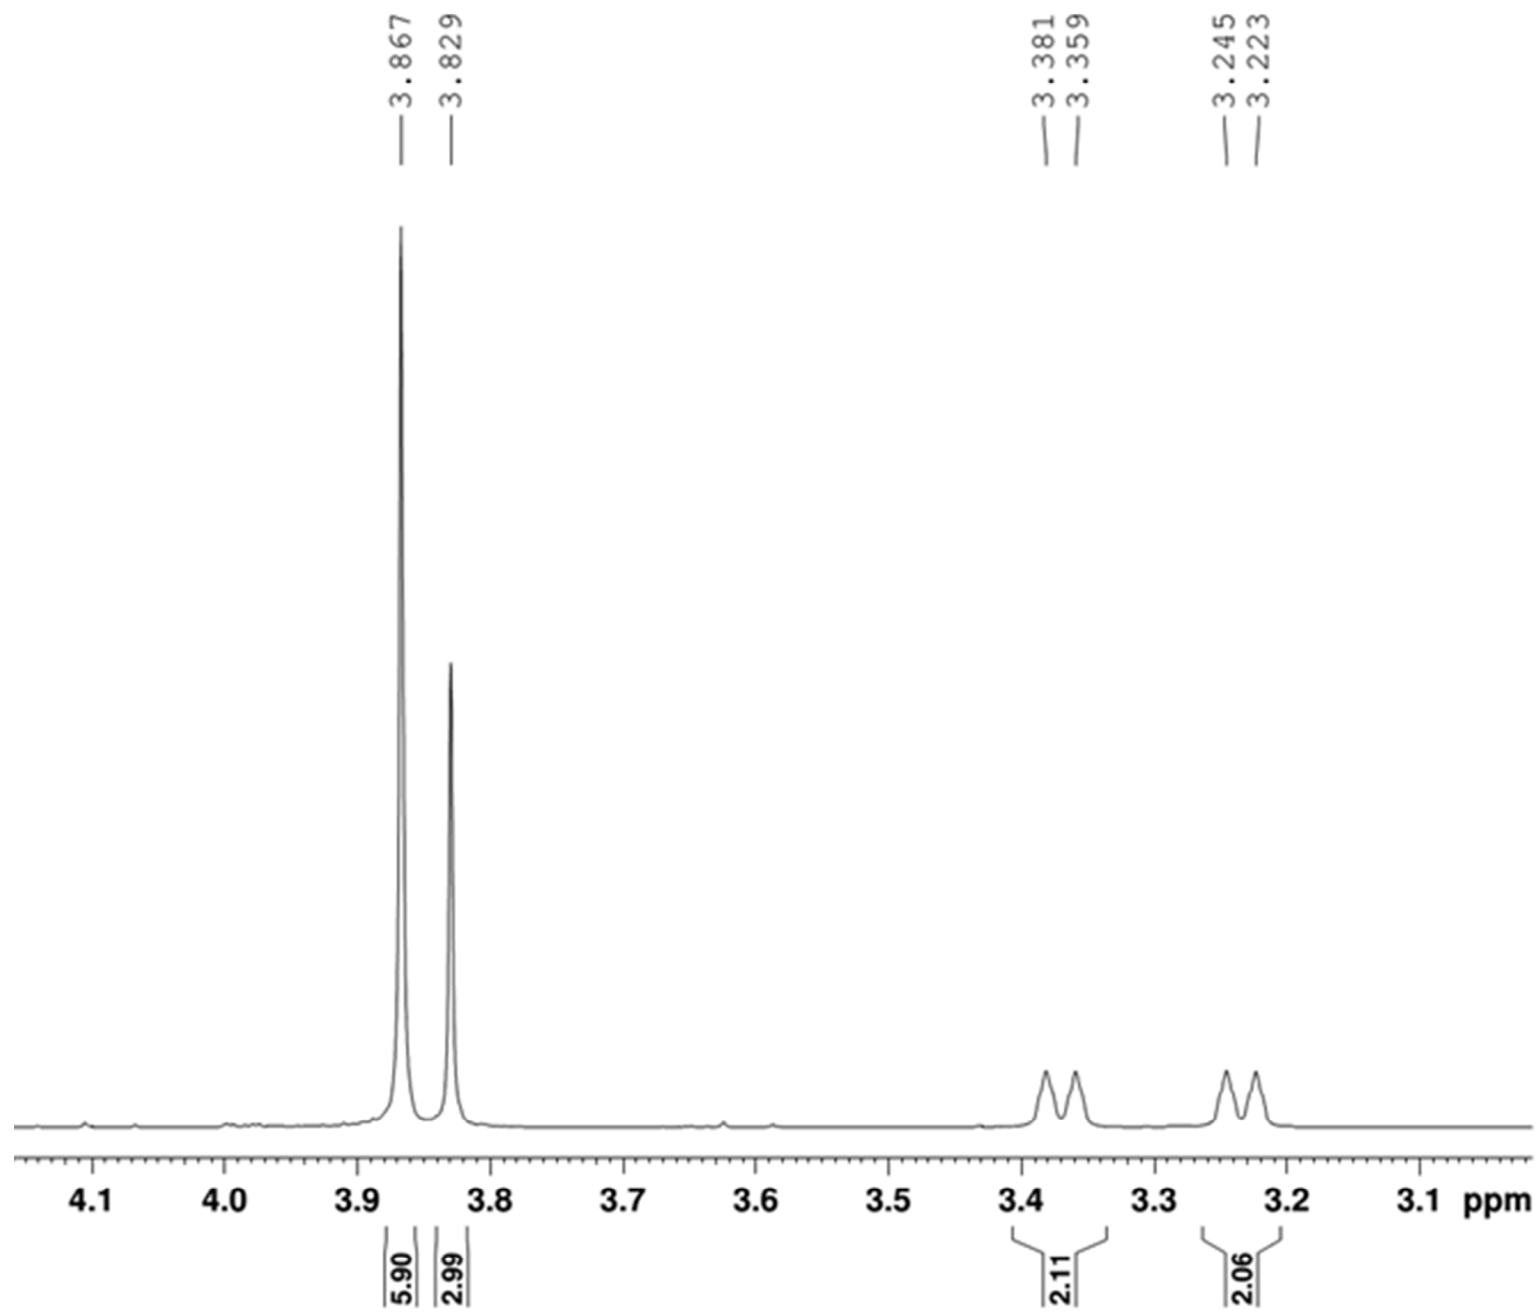

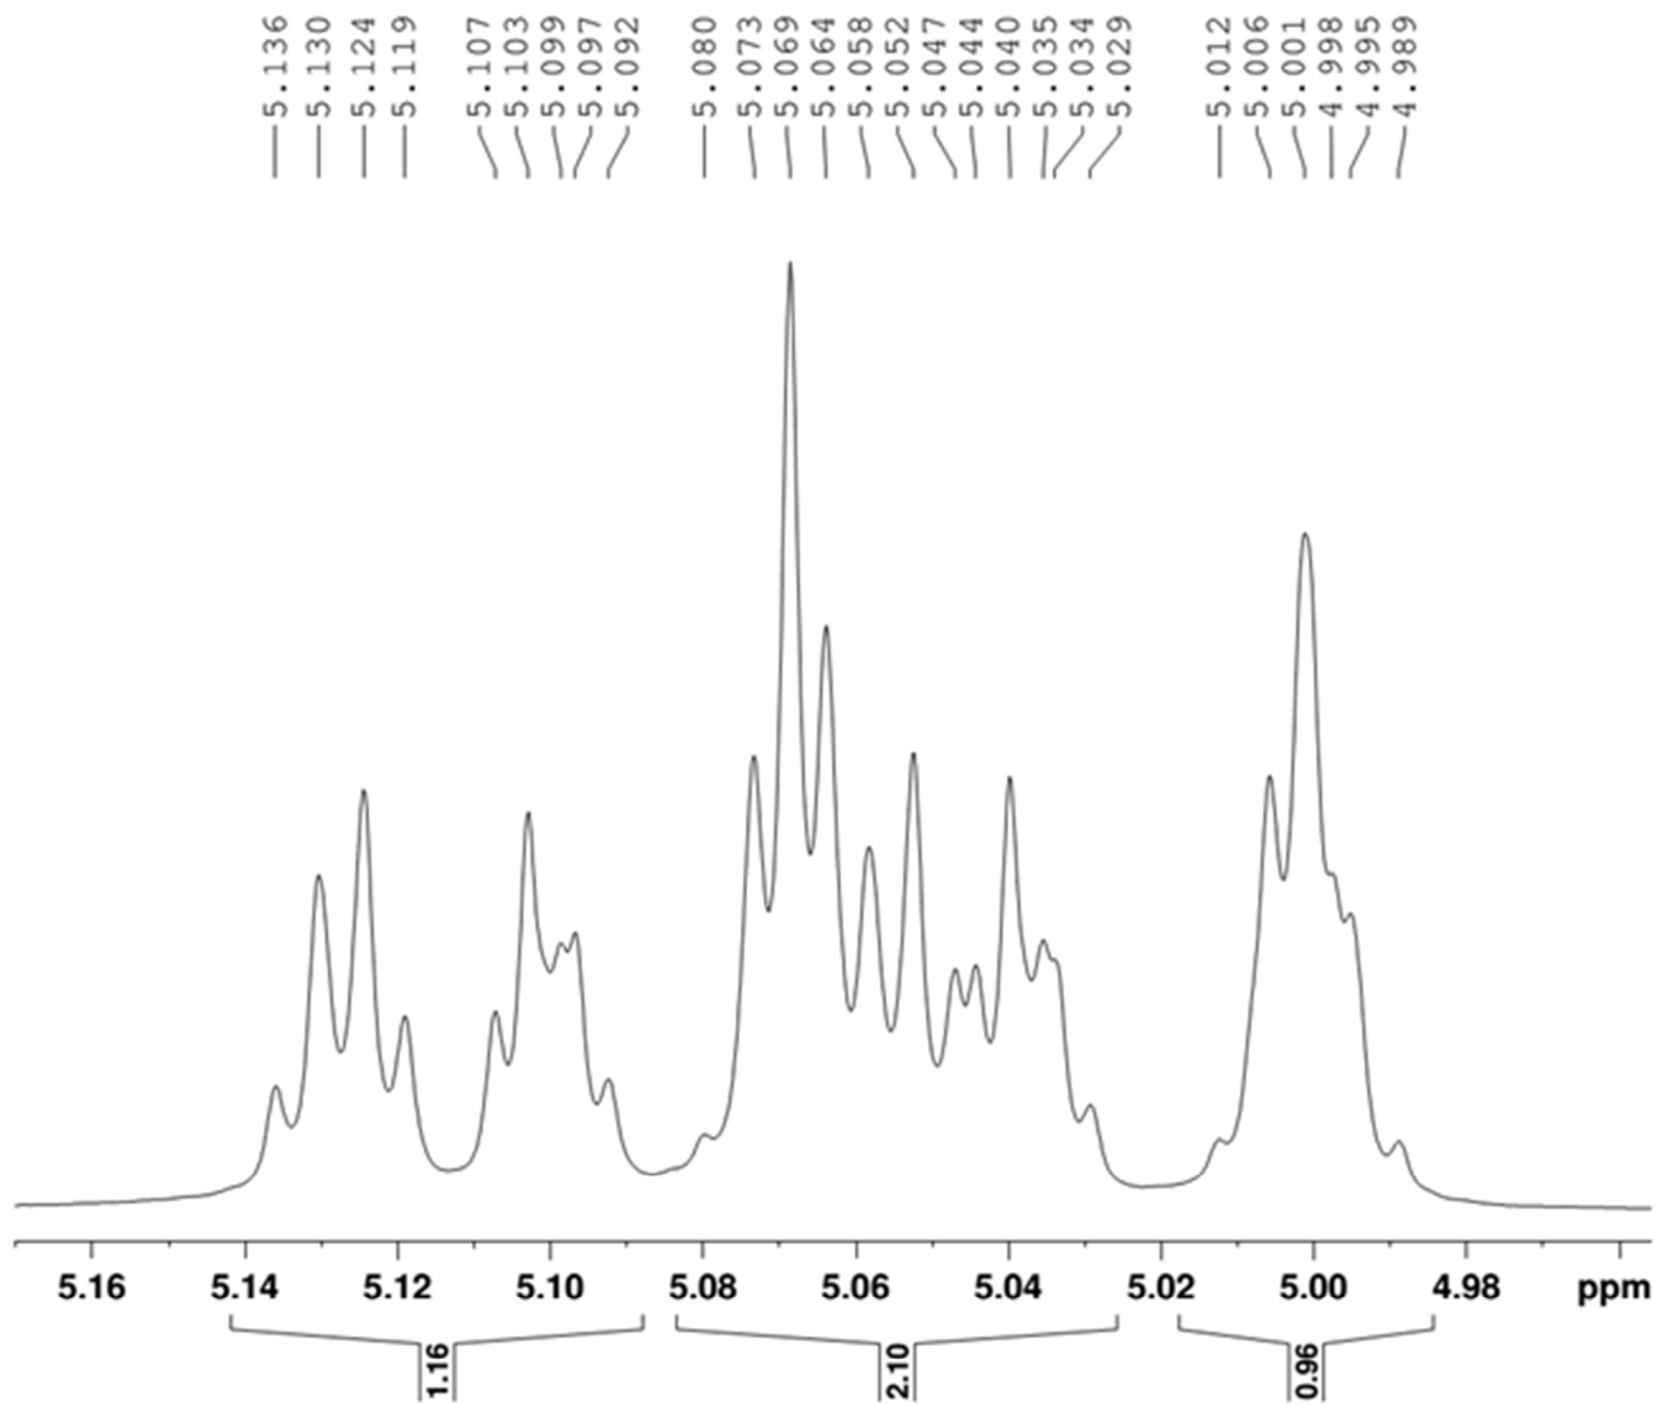

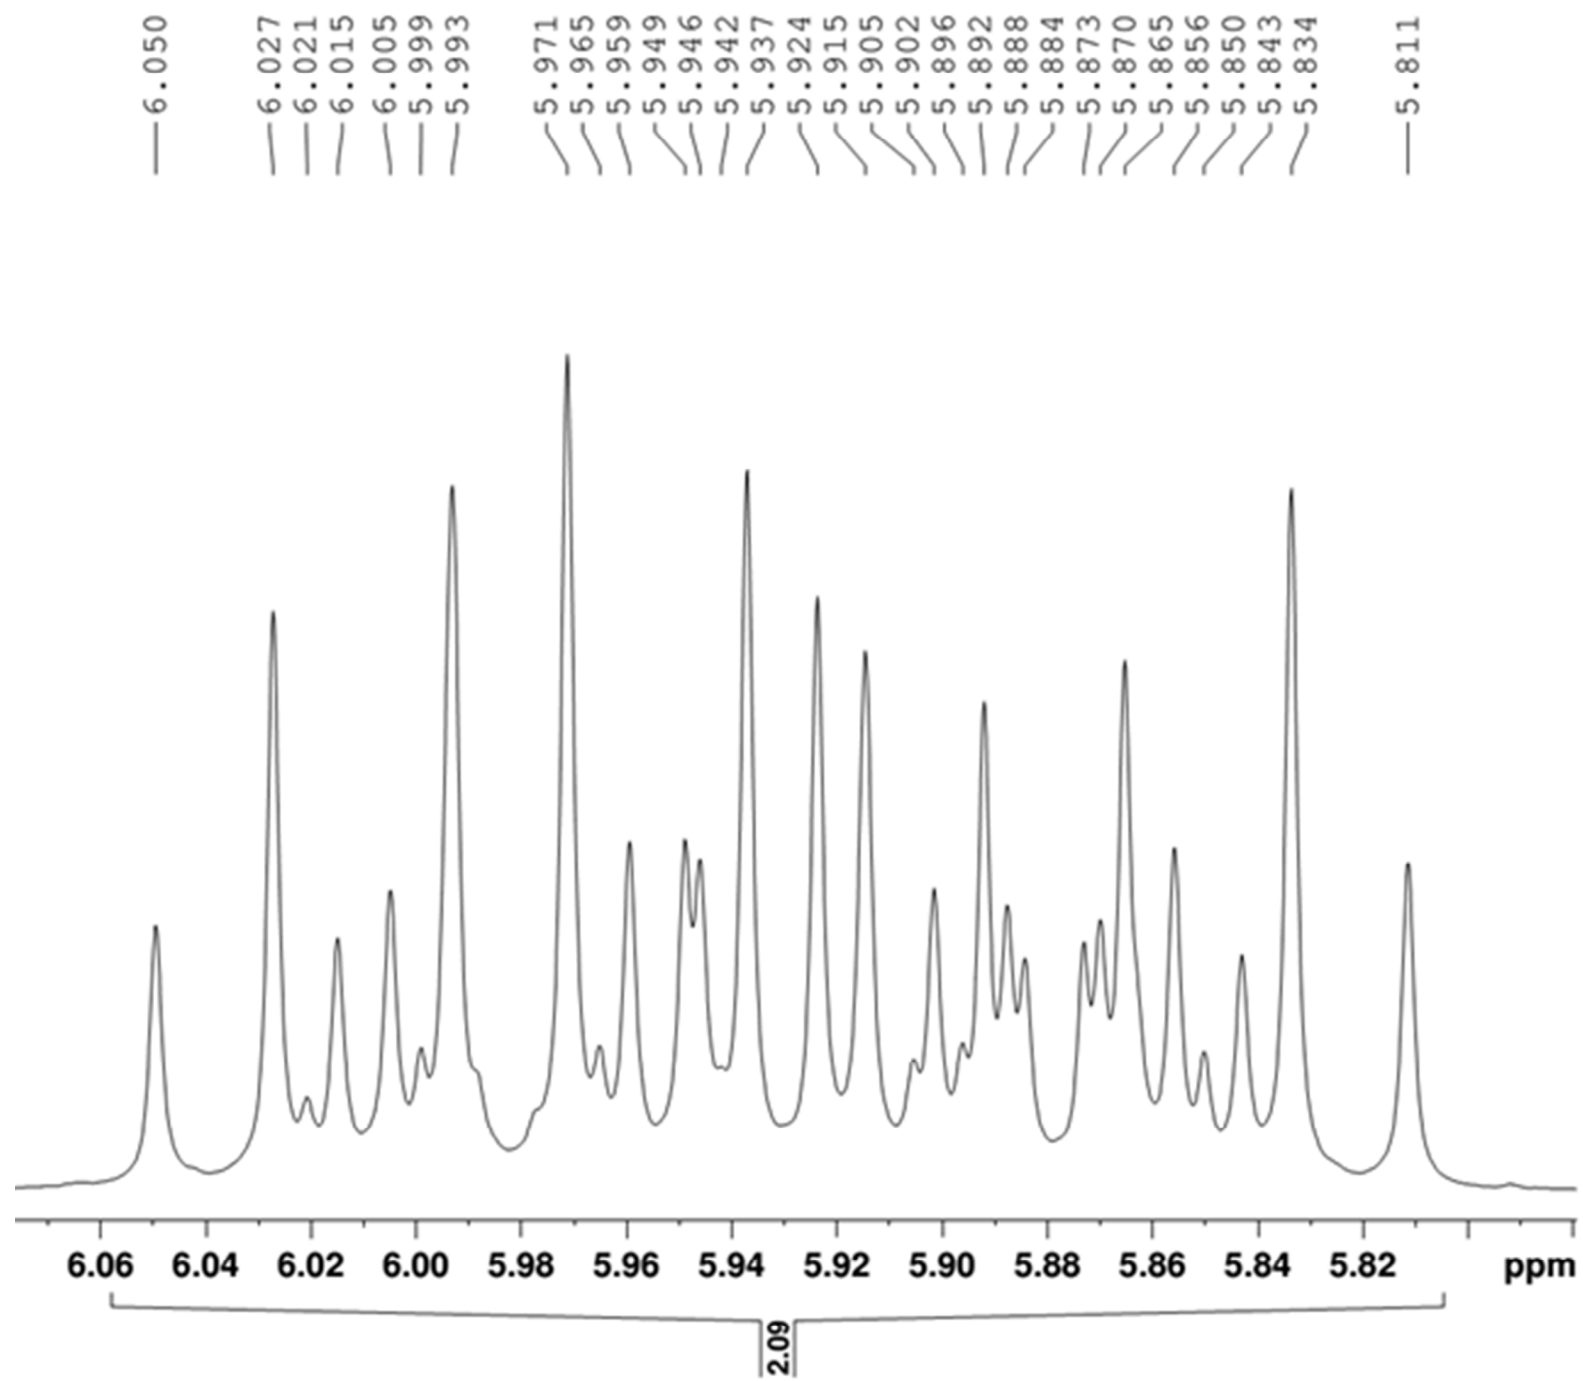

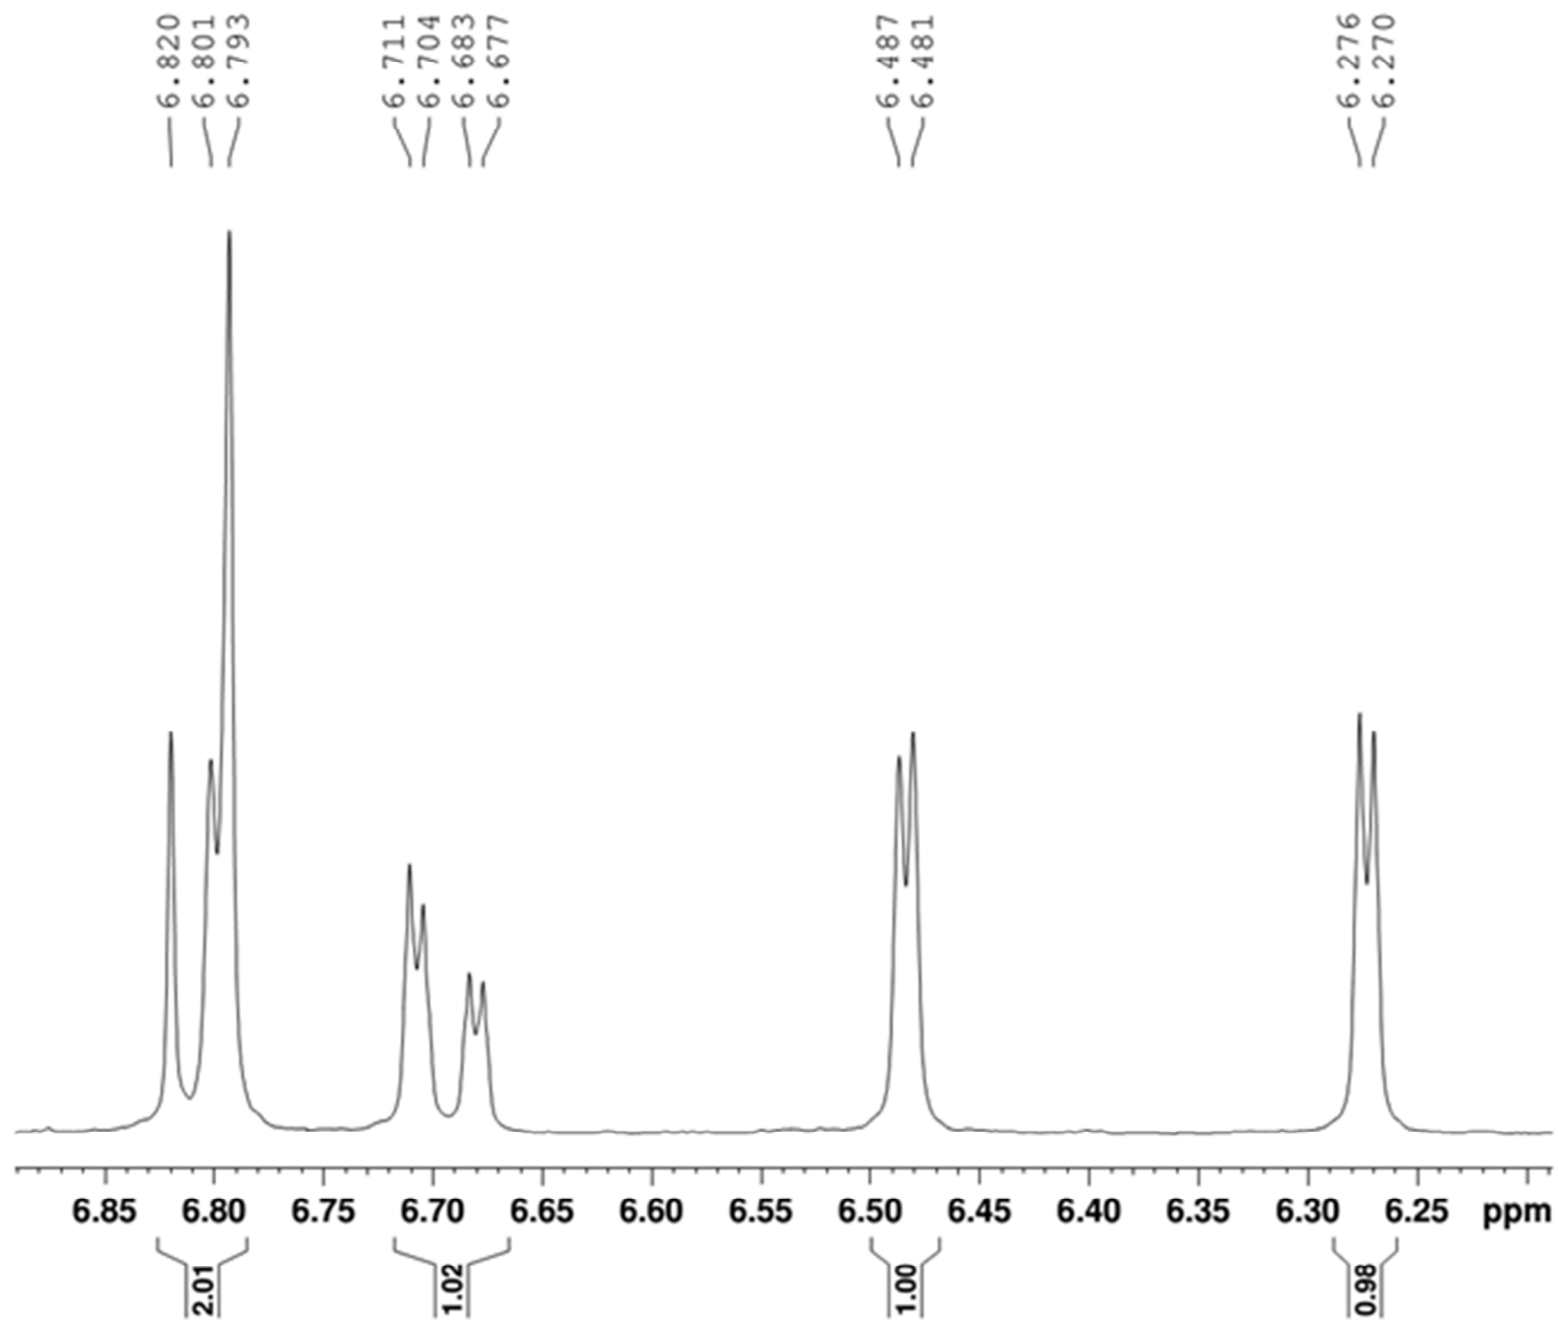

## COMPOUND 2

$^{13}\text{C}$  NMR spectrum ( $\delta$ ,  $\text{CDCl}_3$ , 75 MHz)

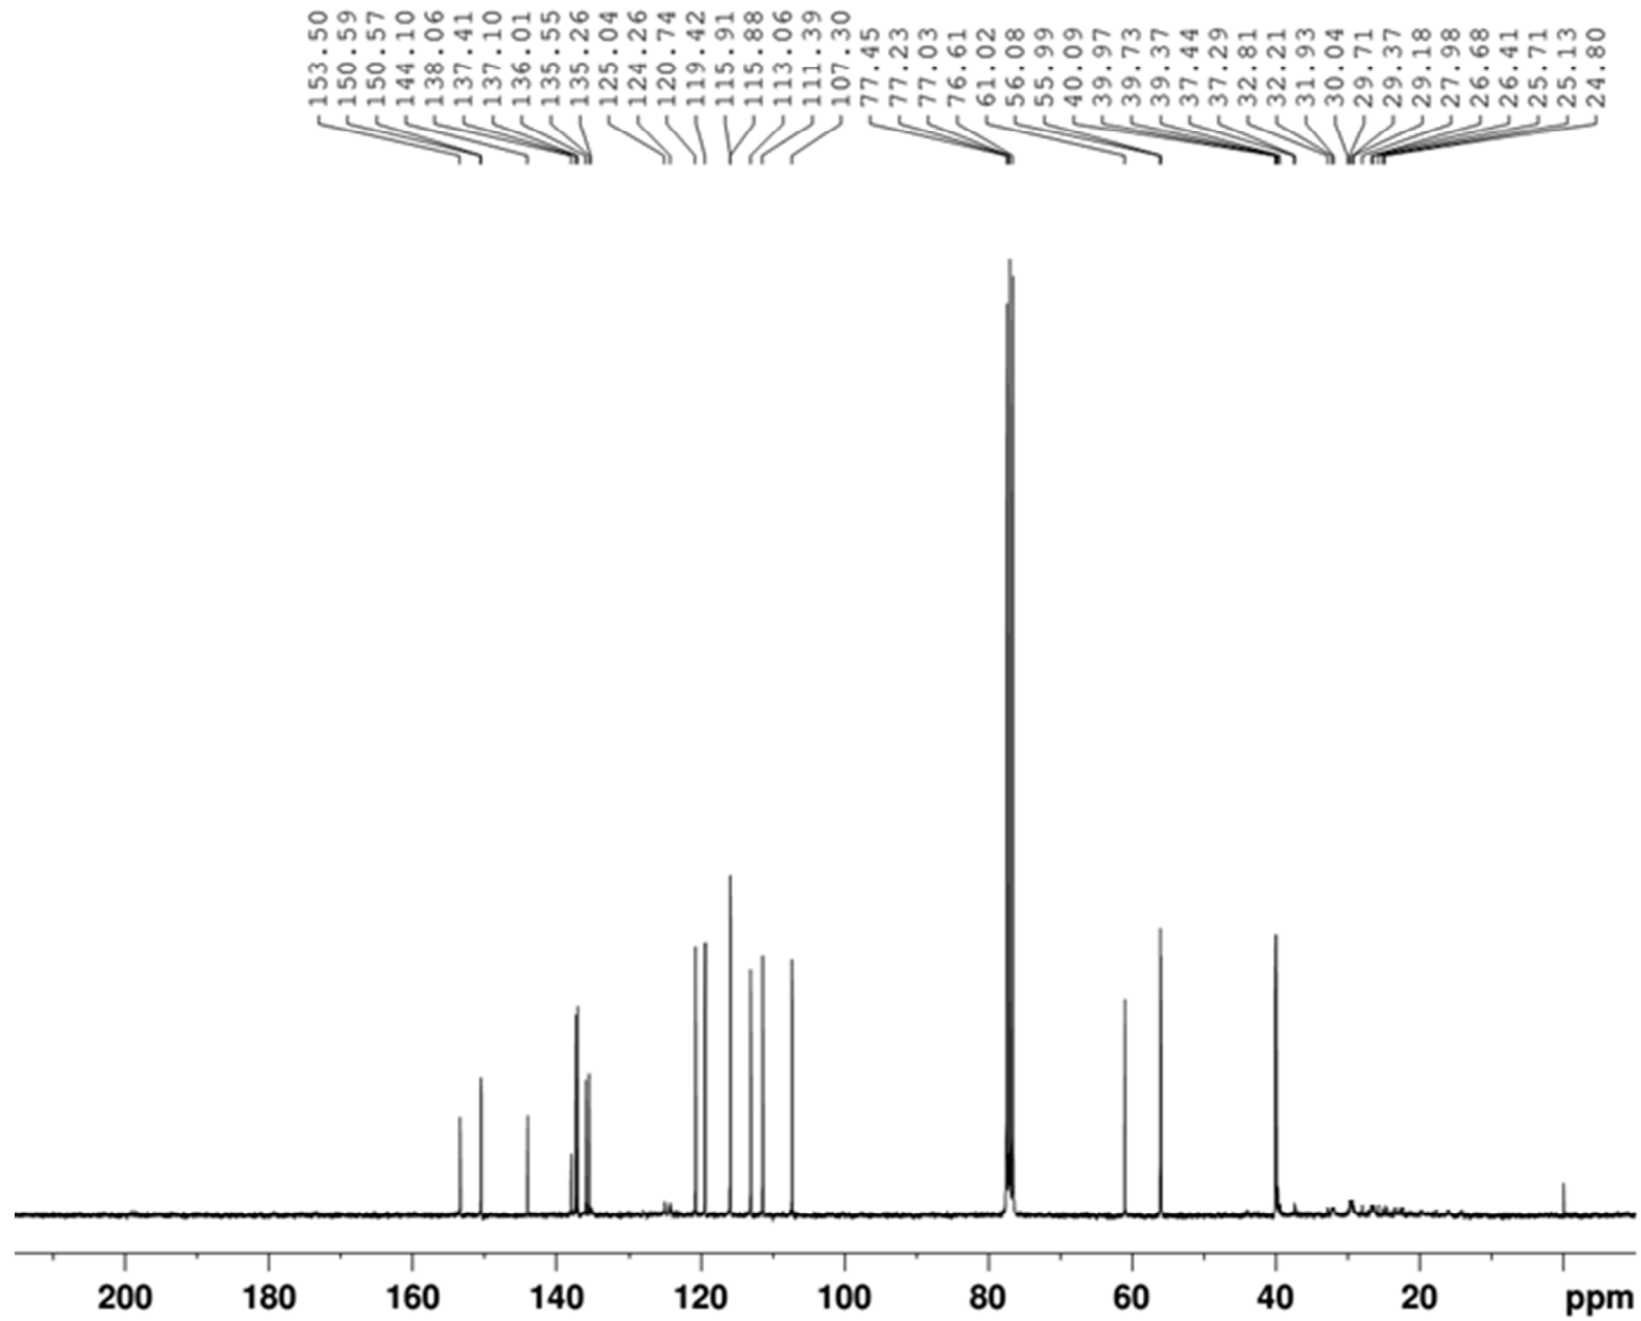

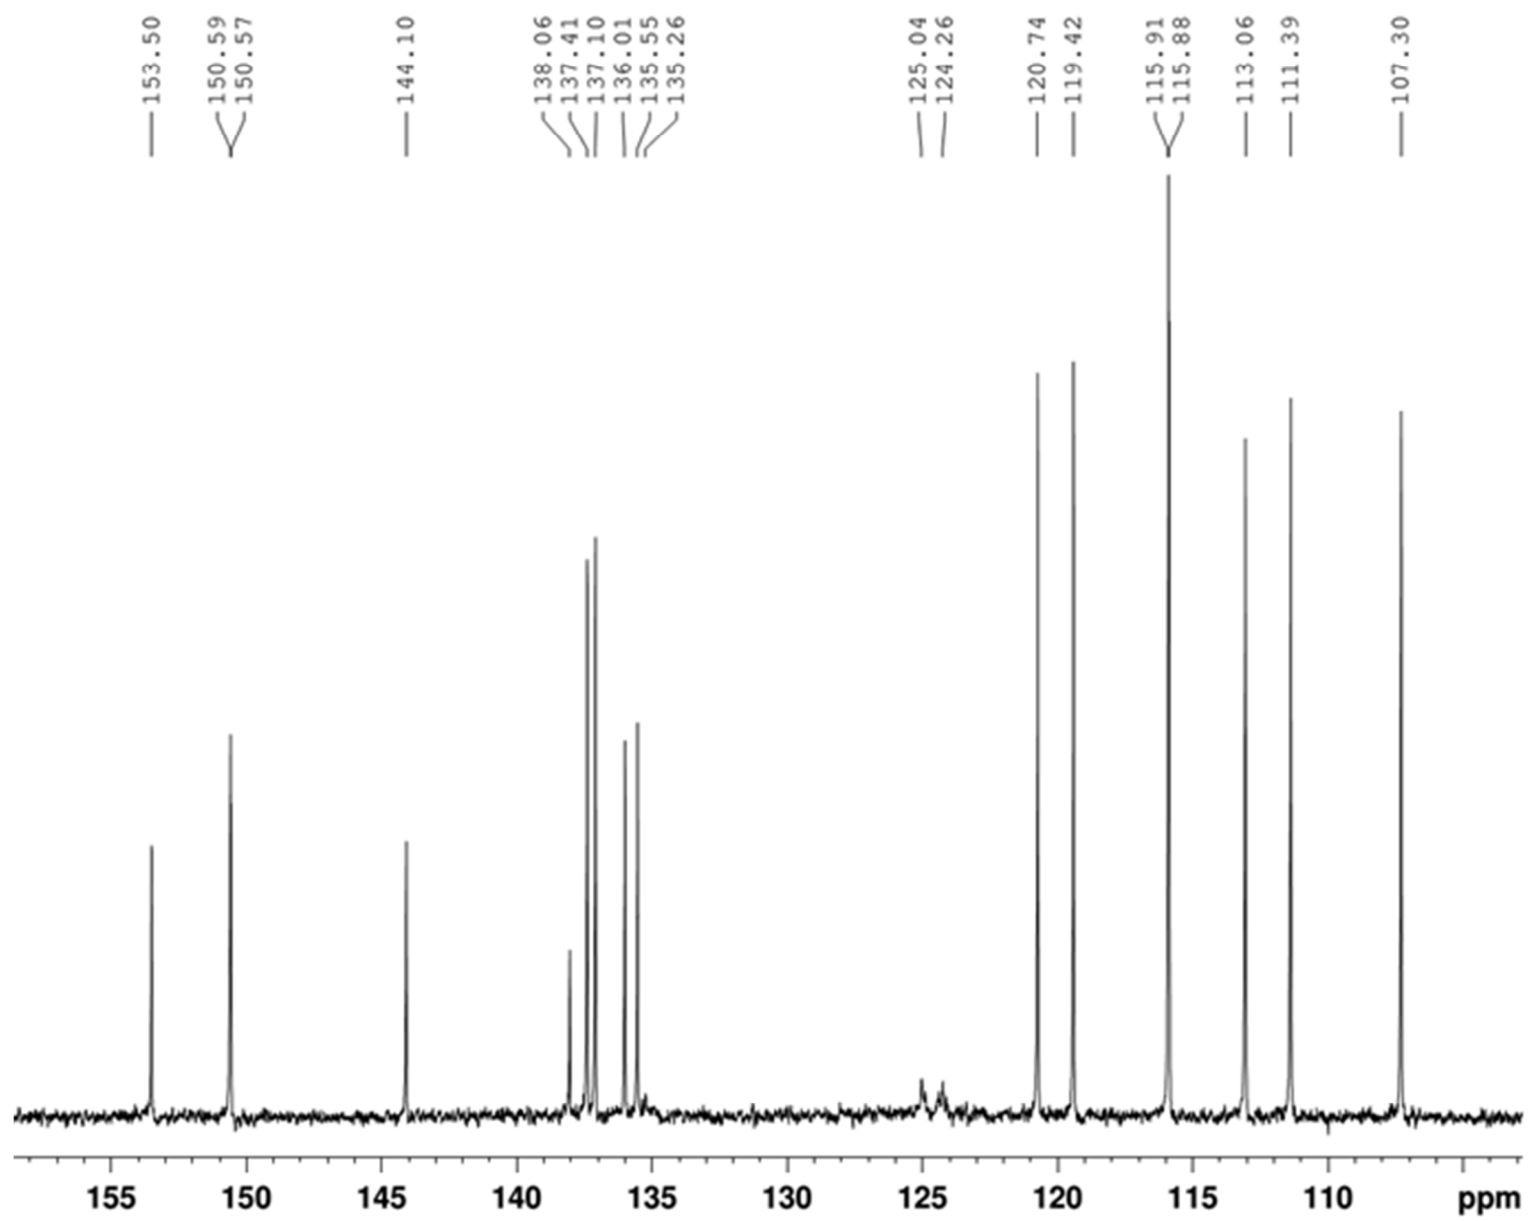

## COMPOUND 2

DEPT 135° NMR spectrum ( $\delta$ , CDCl<sub>3</sub>, 75 MHz)



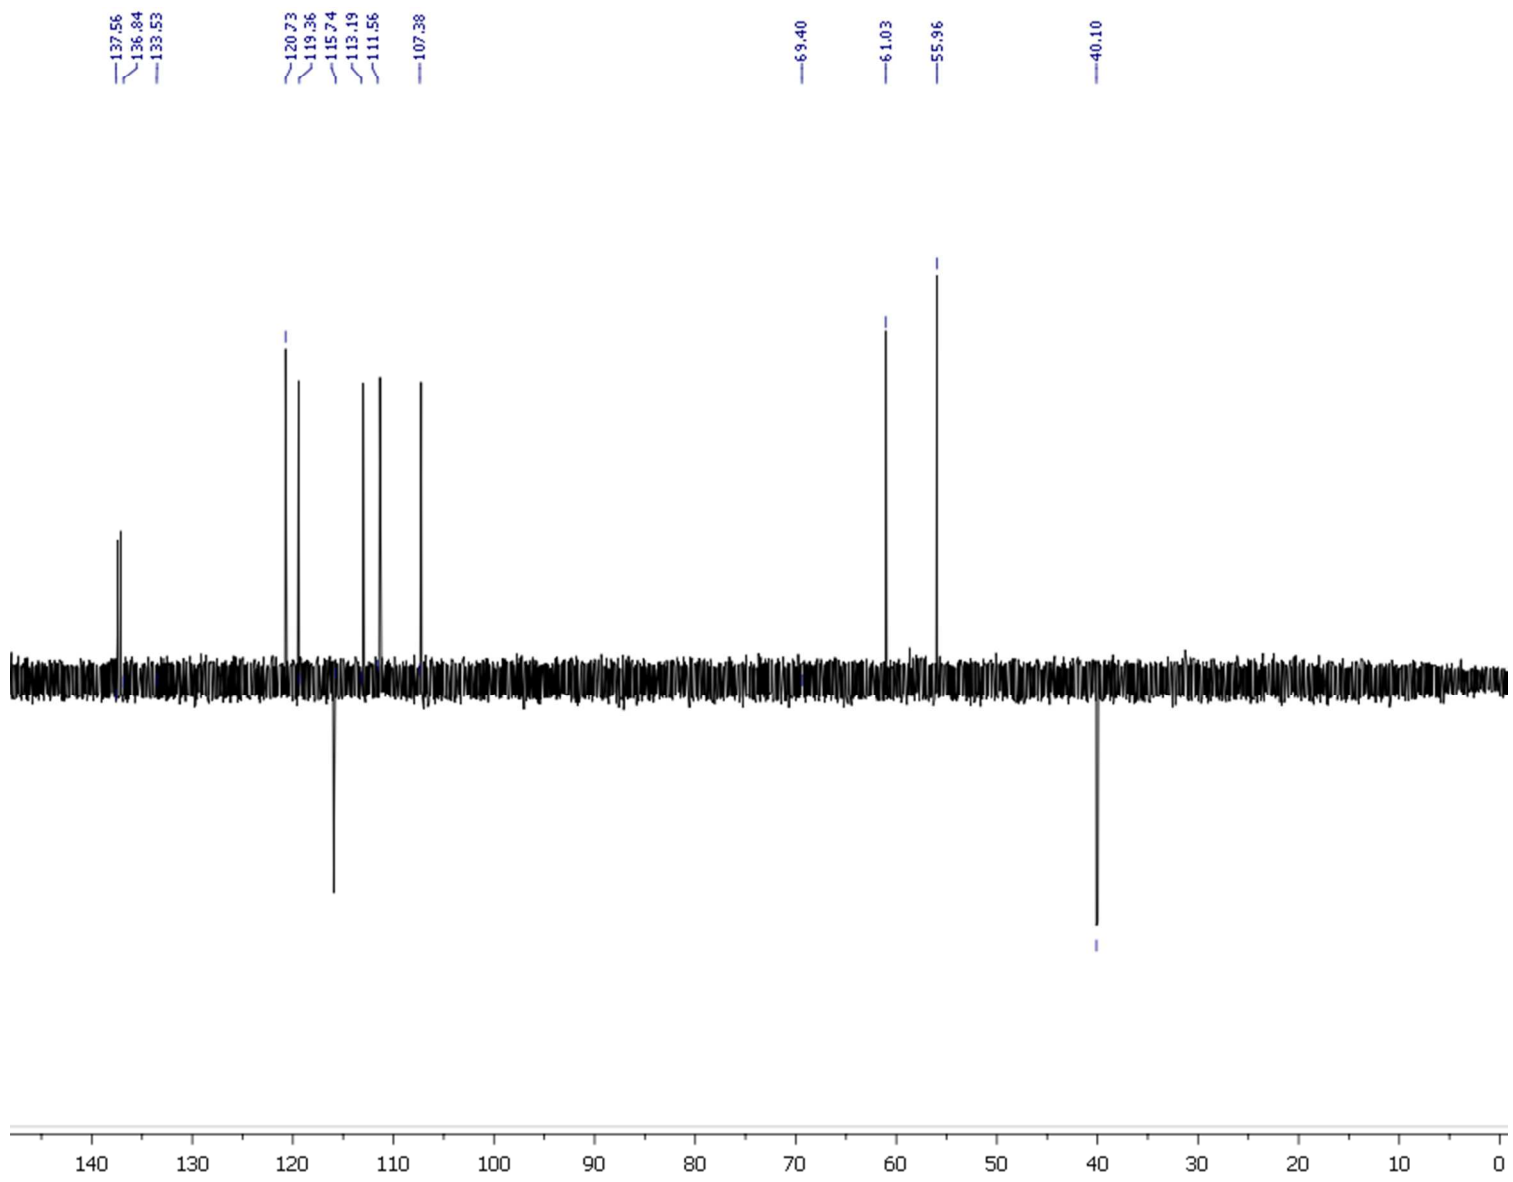

## COMPOUND 2

HMBC NMR spectrum ( $\delta$ , CDCl<sub>3</sub>, 75 MHz)

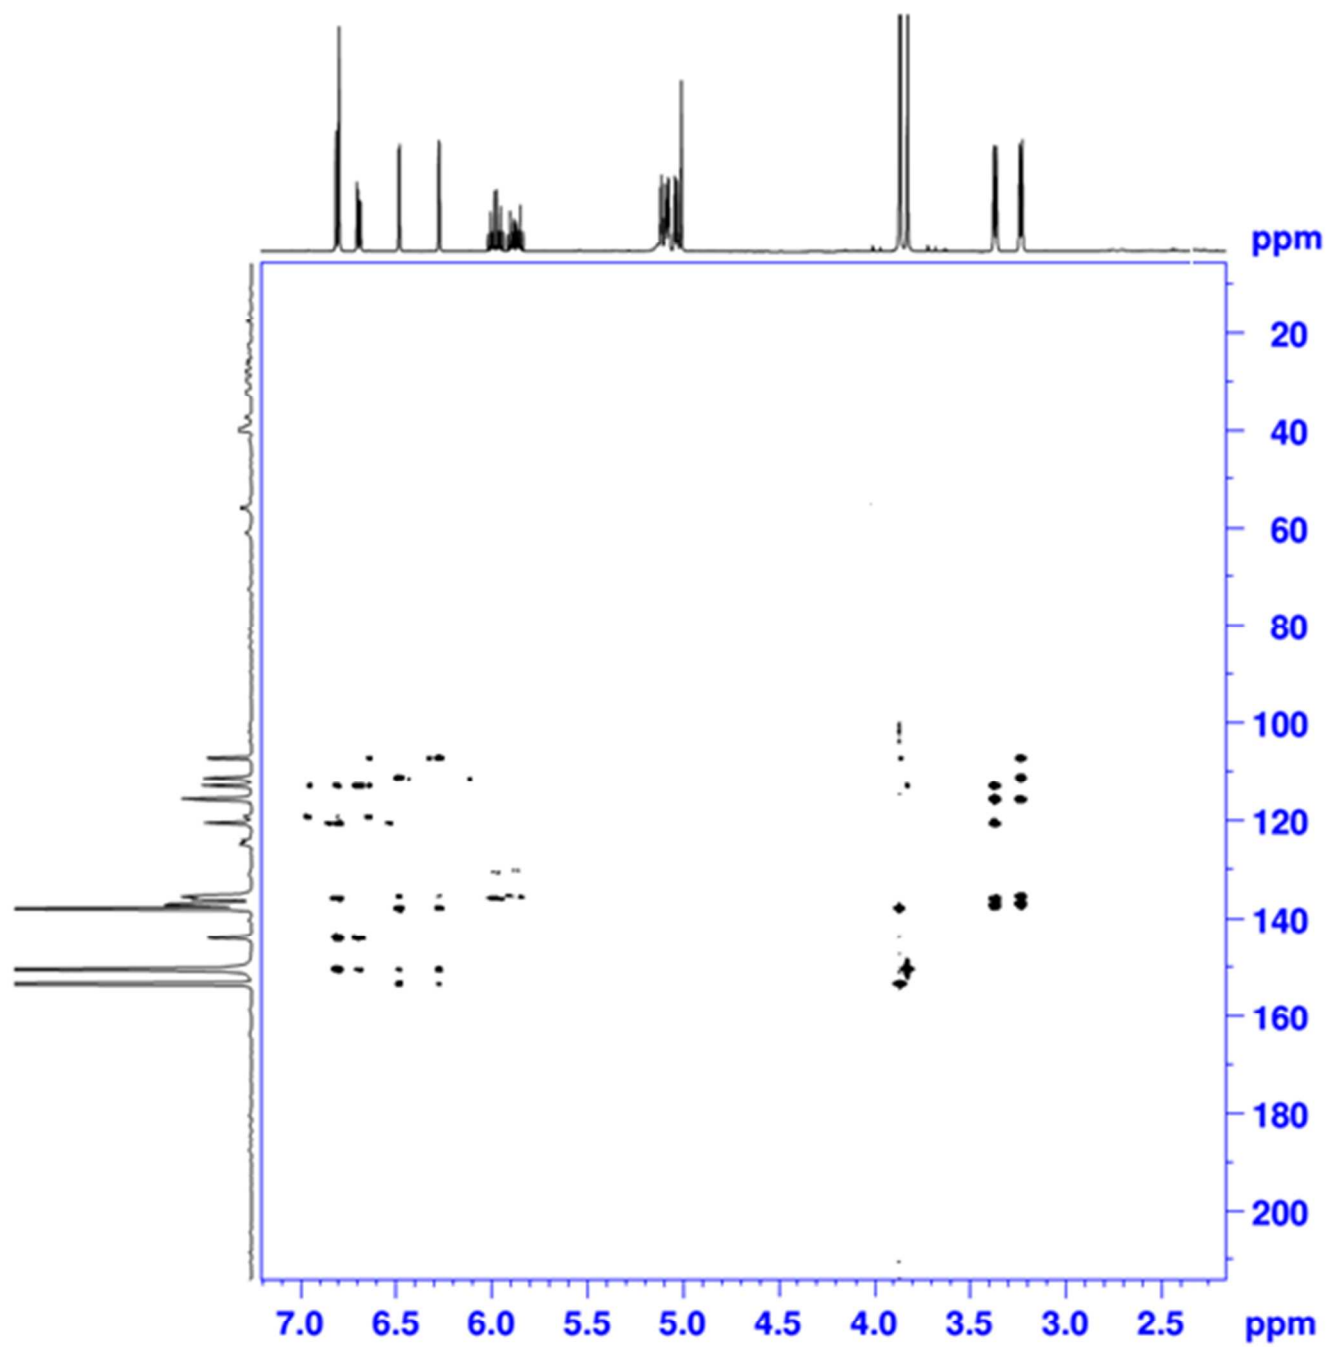

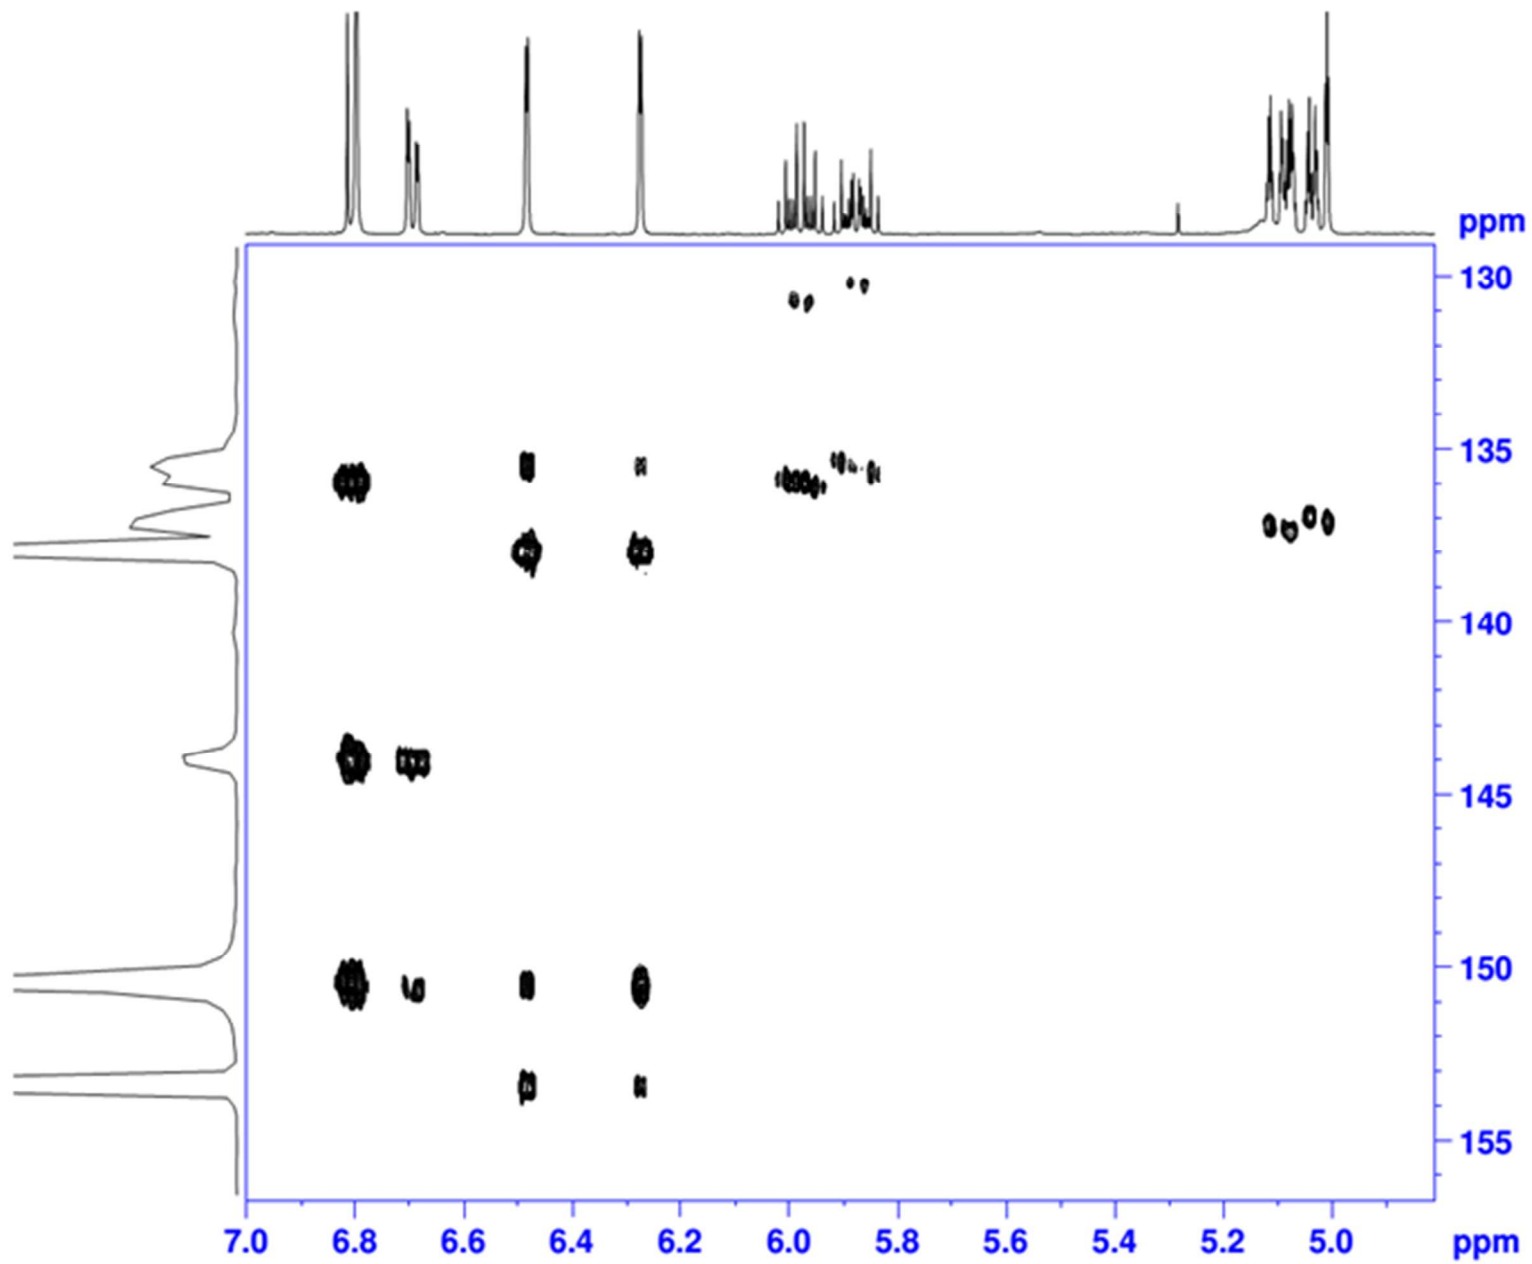

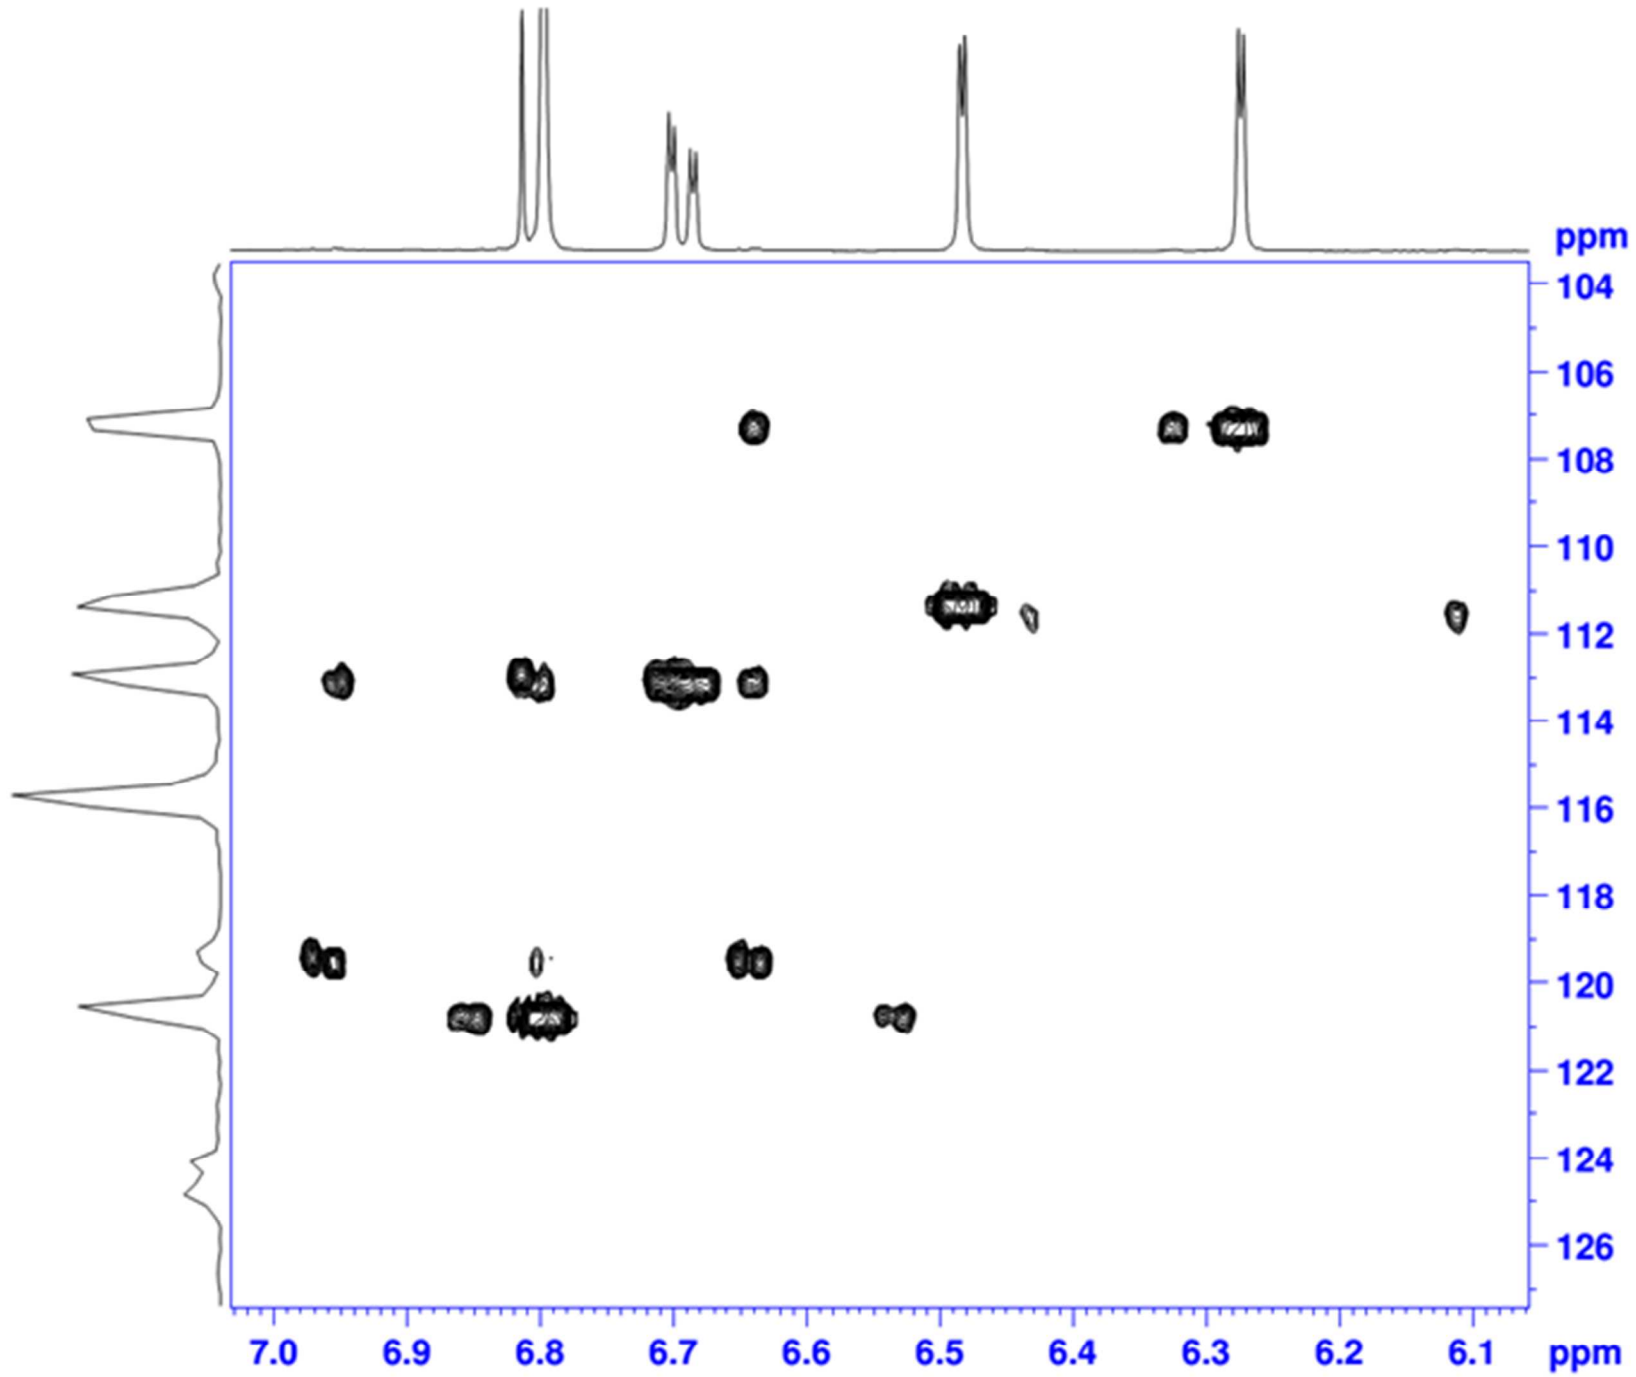

## COMPOUND 2

HSQC NMR spectrum ( $\delta$ , CDCl<sub>3</sub>, 300 and 75 MHz)

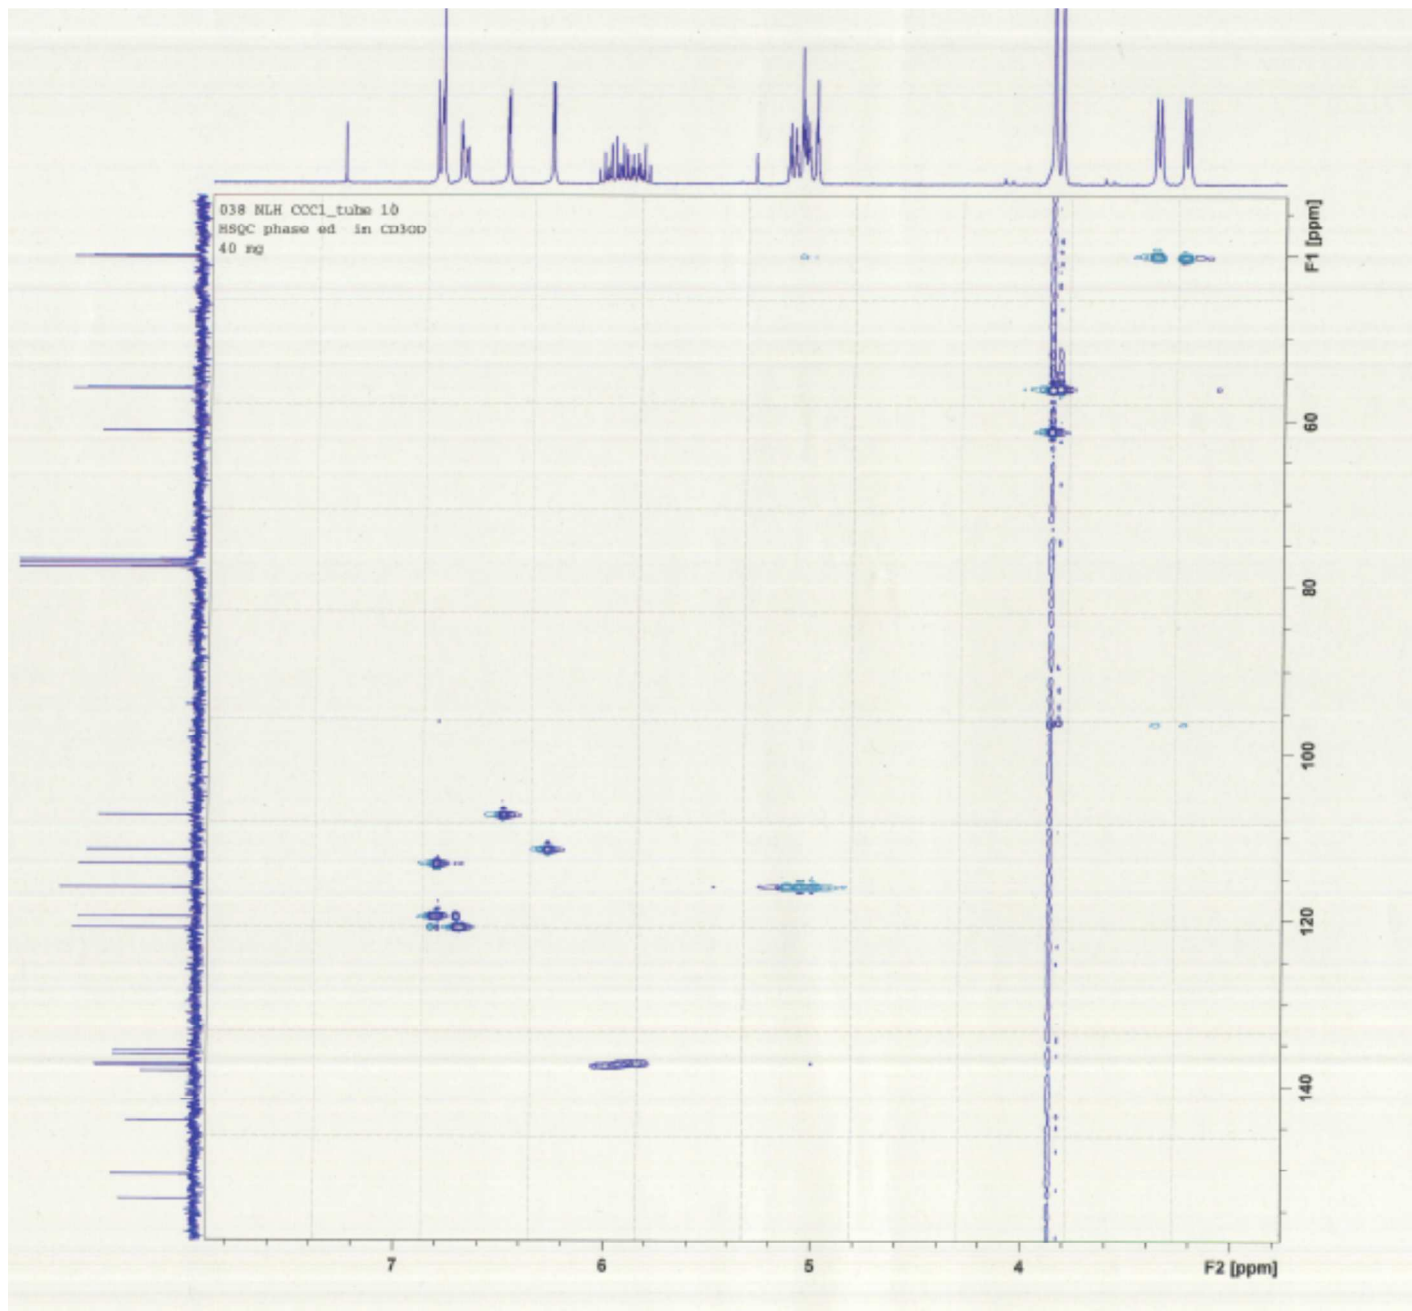

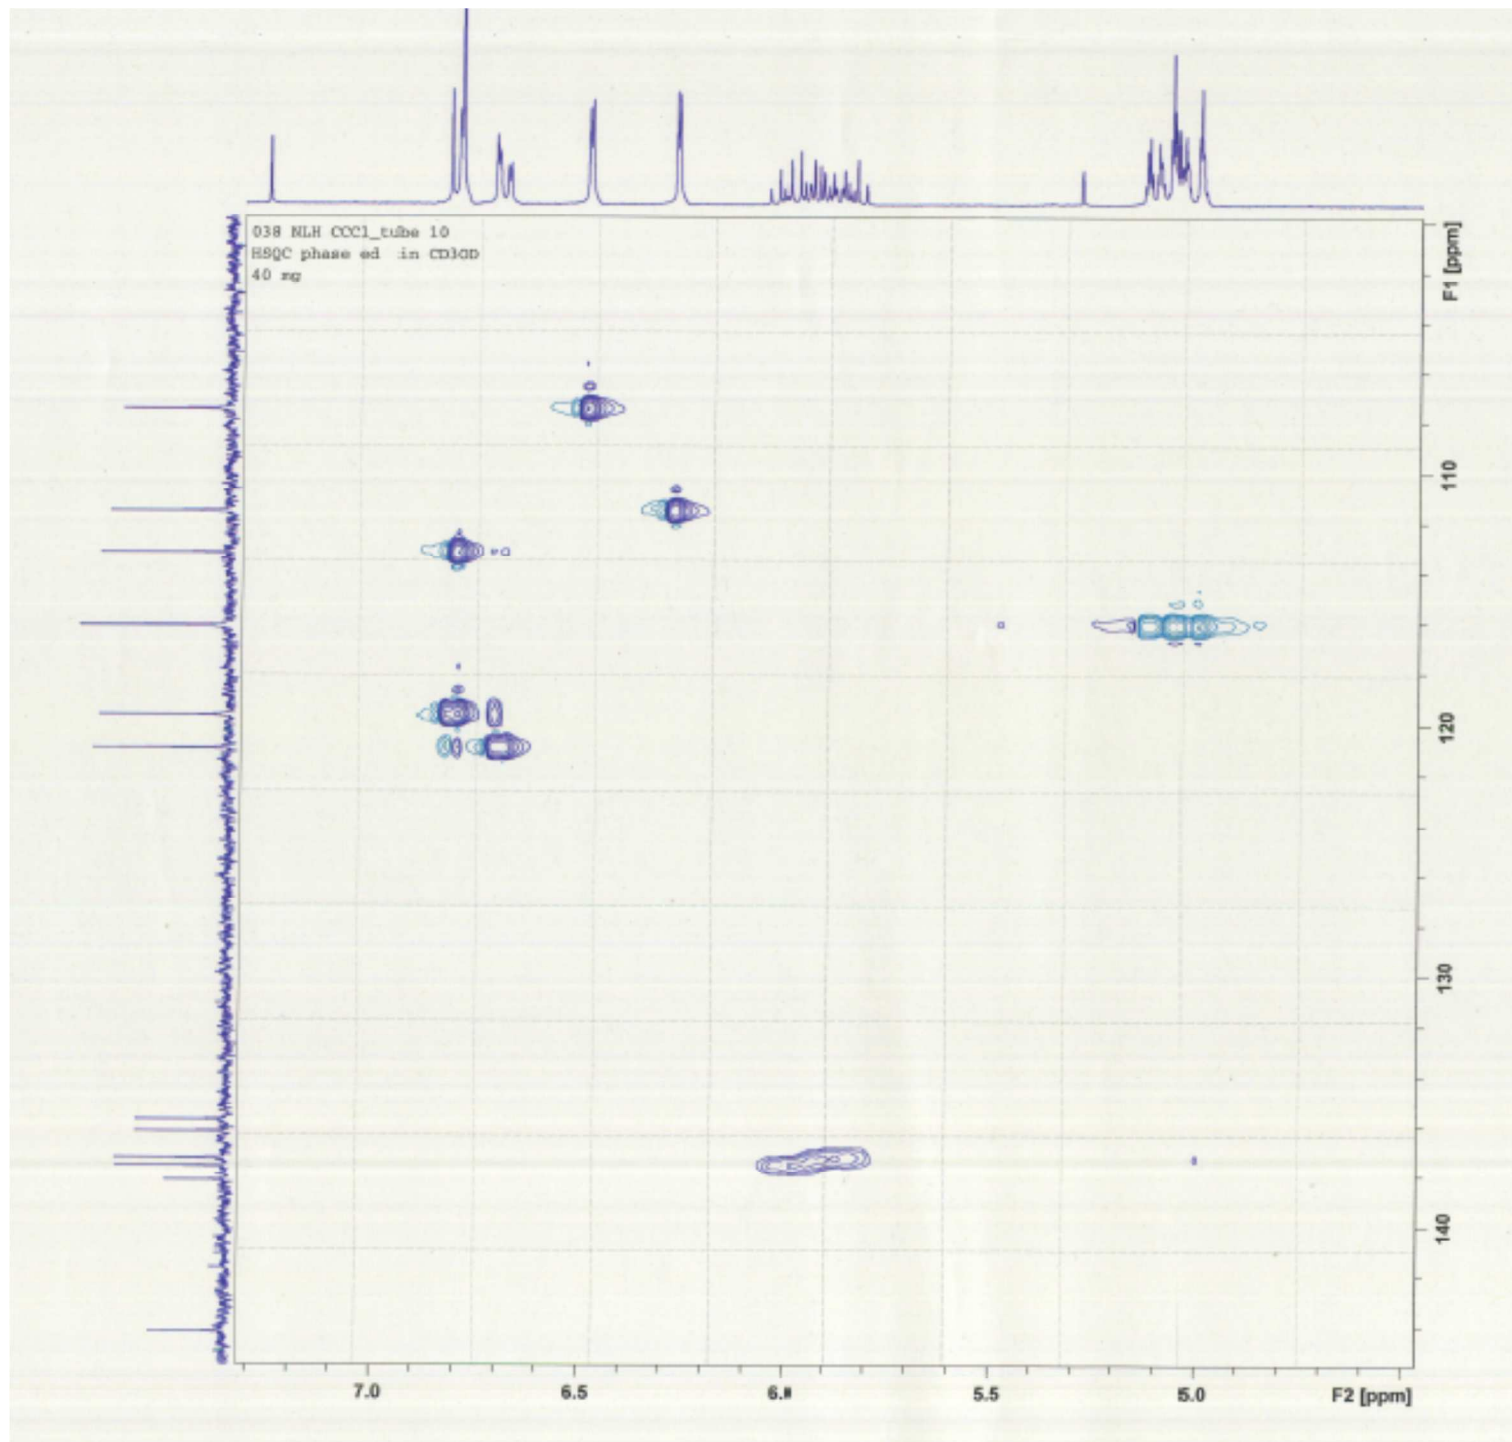



# COMPOUND 2

## MASS SPECTRUM

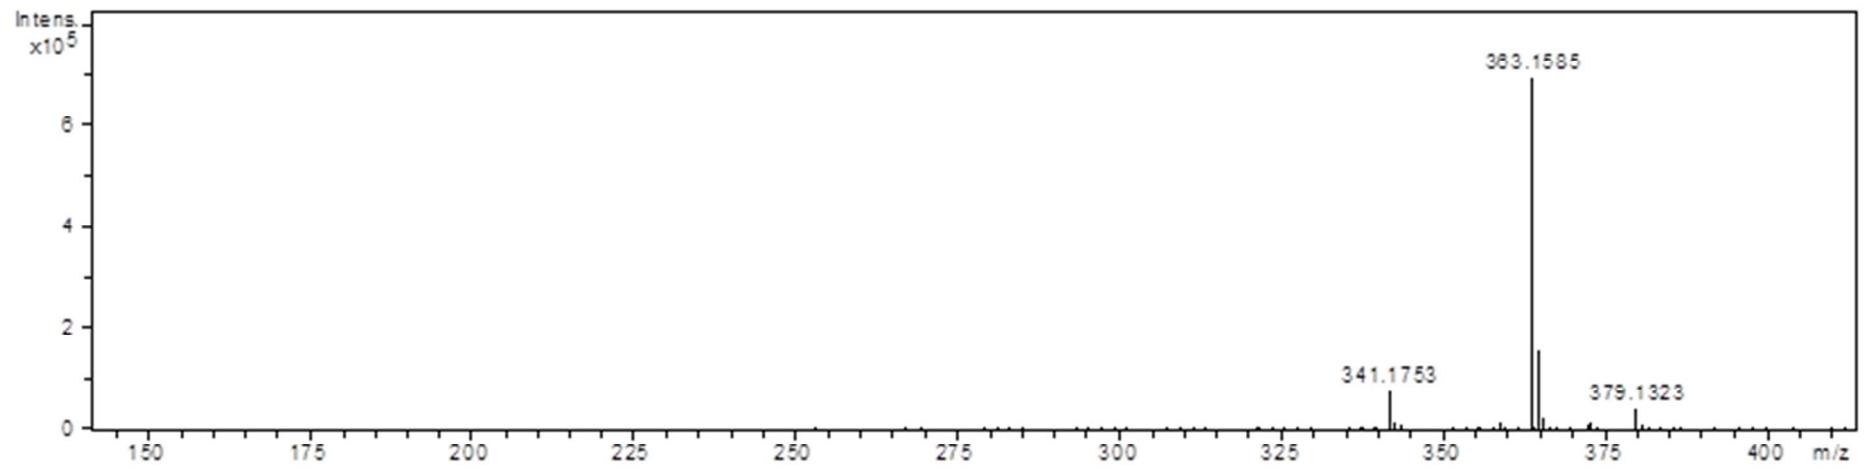

# COMPOUND 2

## INFRARED SPECTRUM

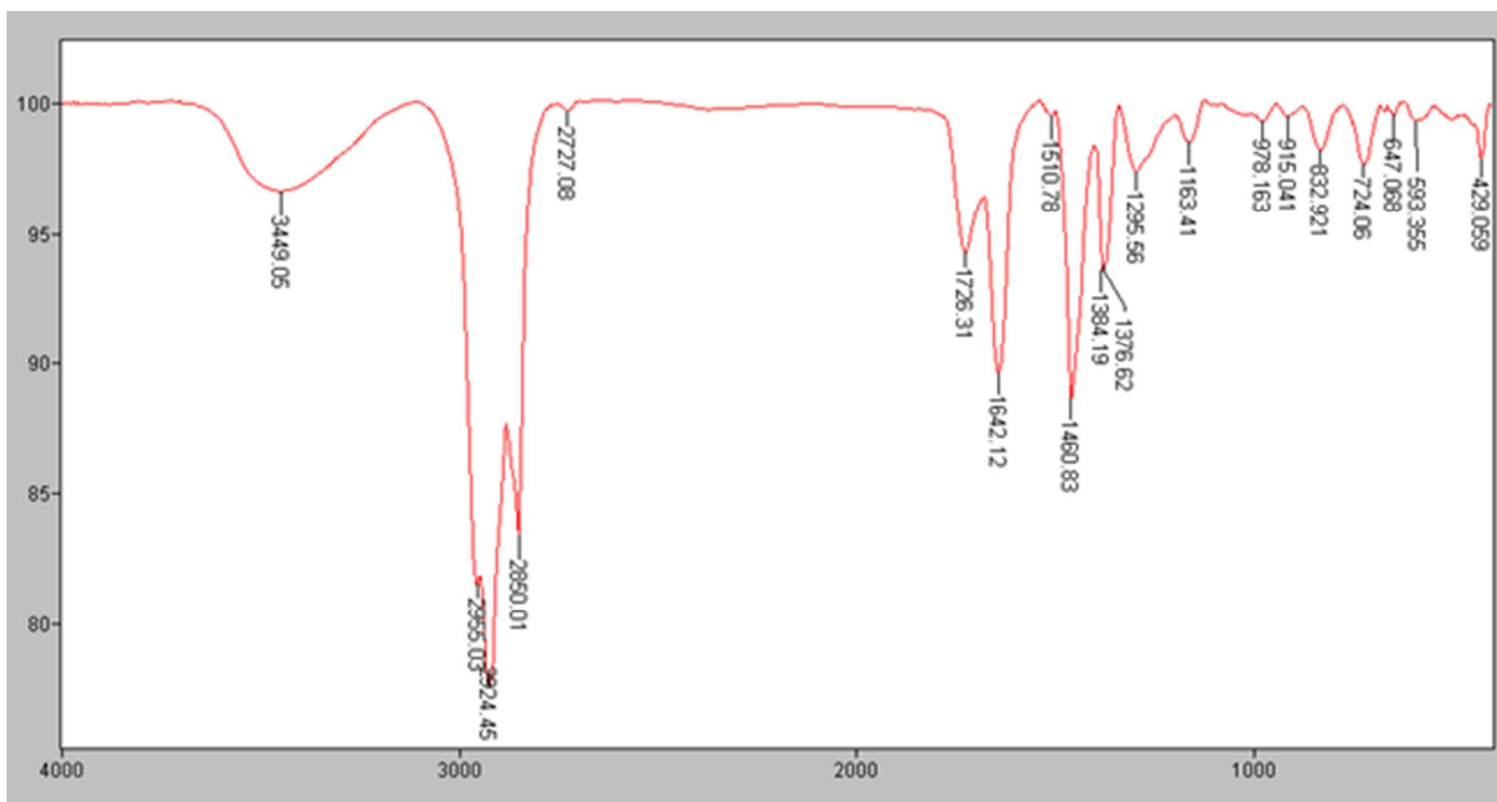

## COMPOUND 3

$^1\text{H}$  NMR spectrum ( $\delta$ ,  $\text{CDCl}_3$ , 300 MHz)

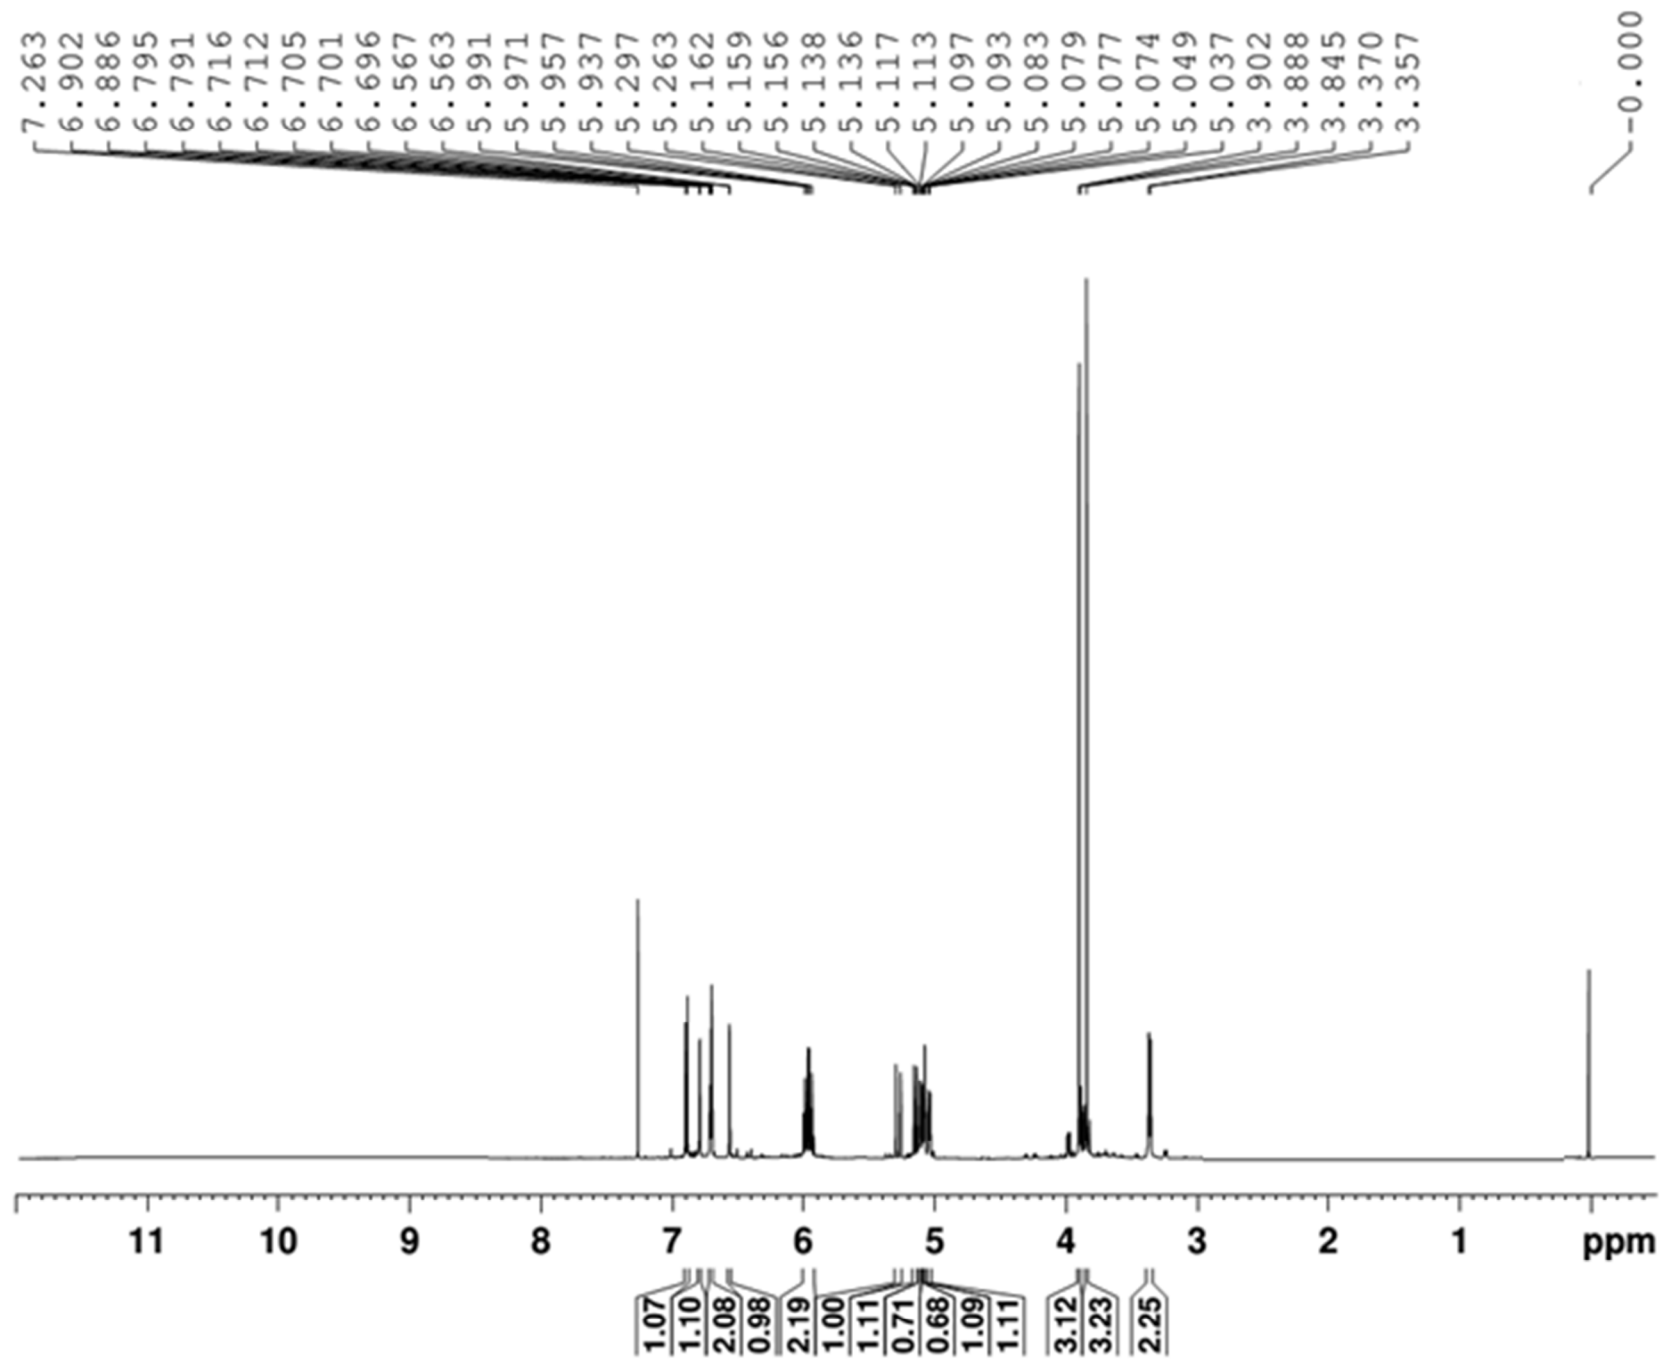

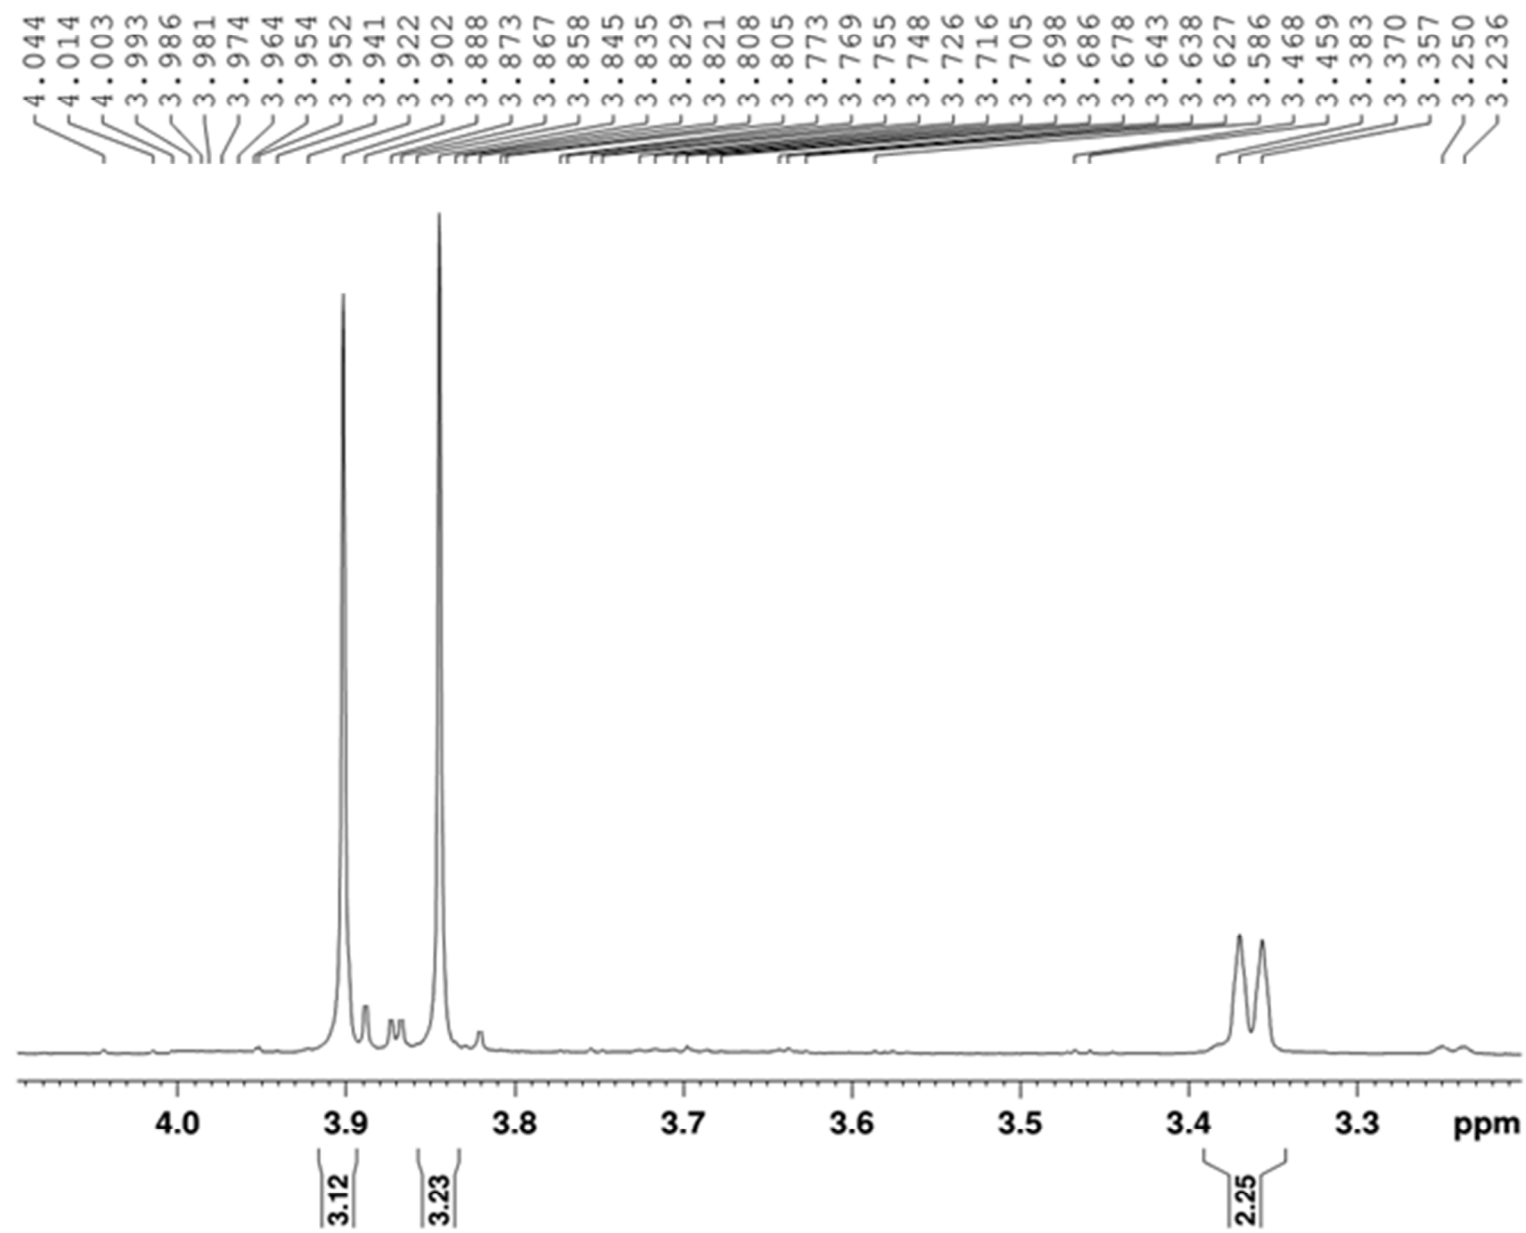

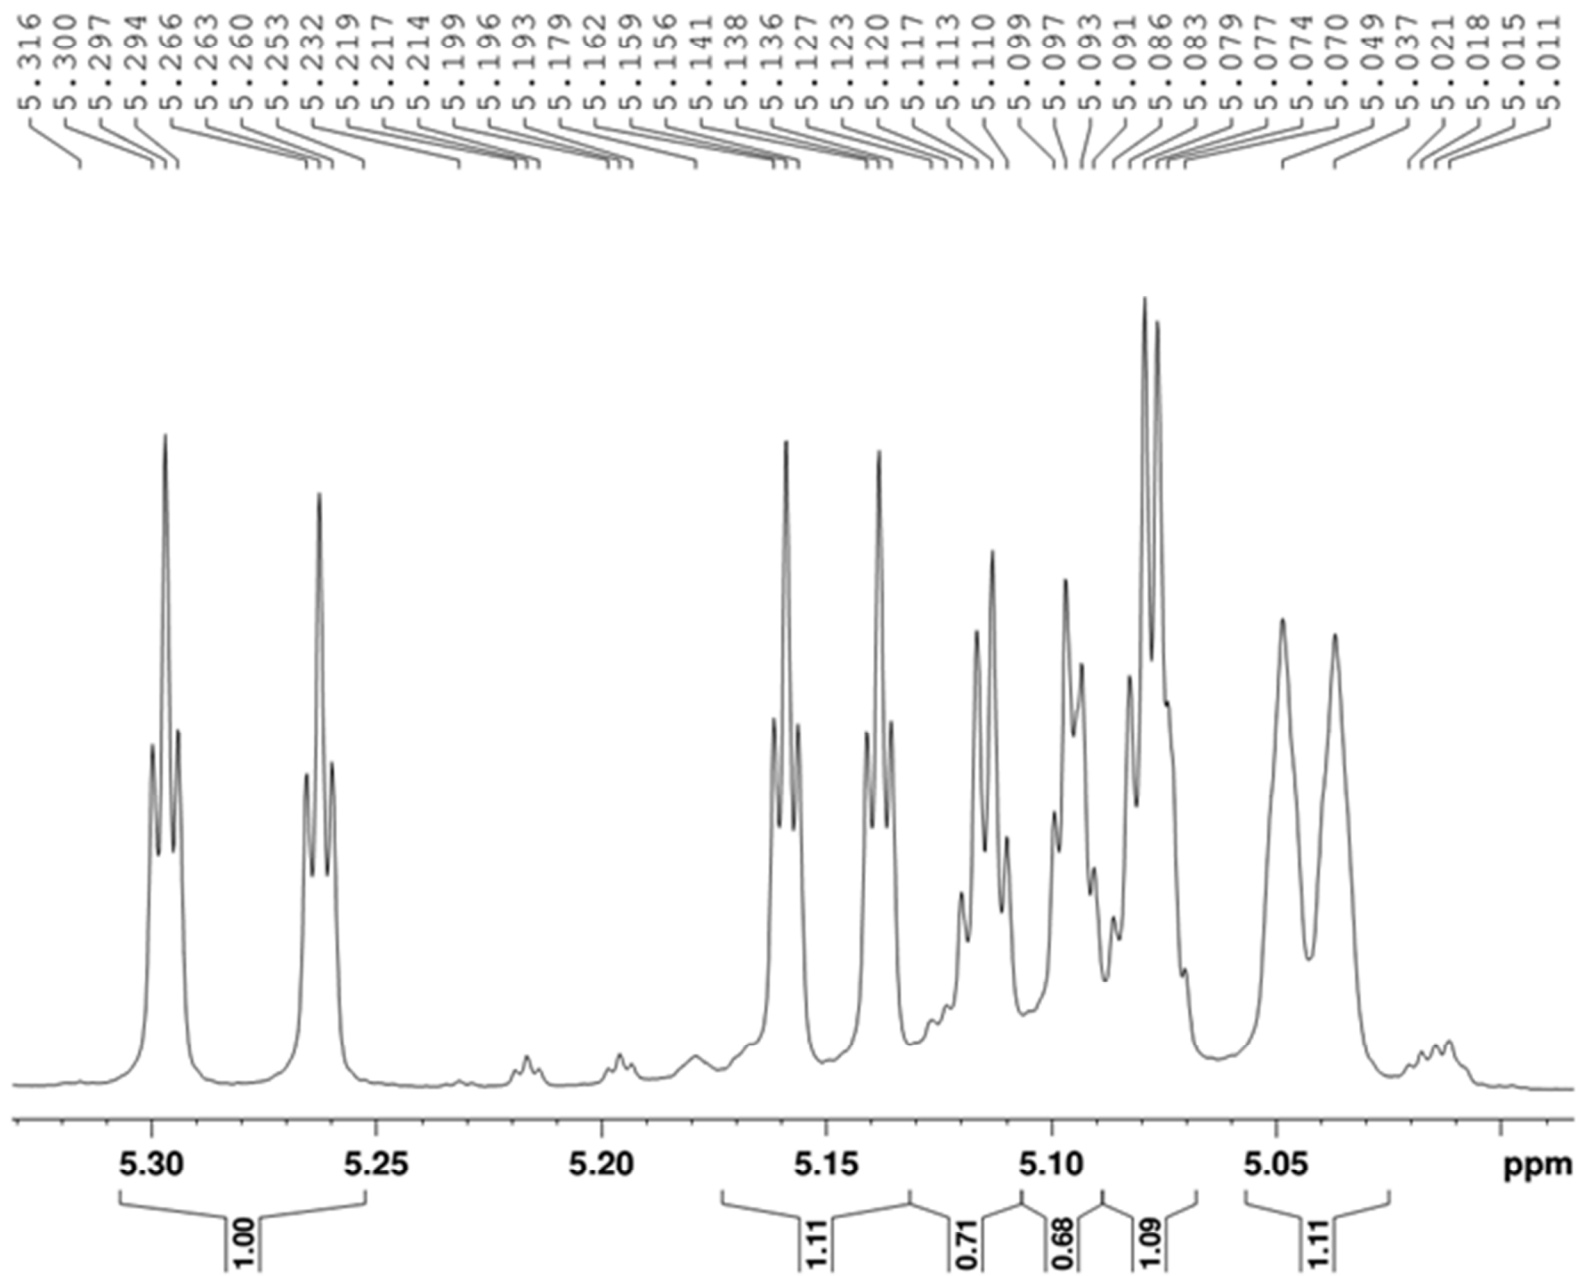

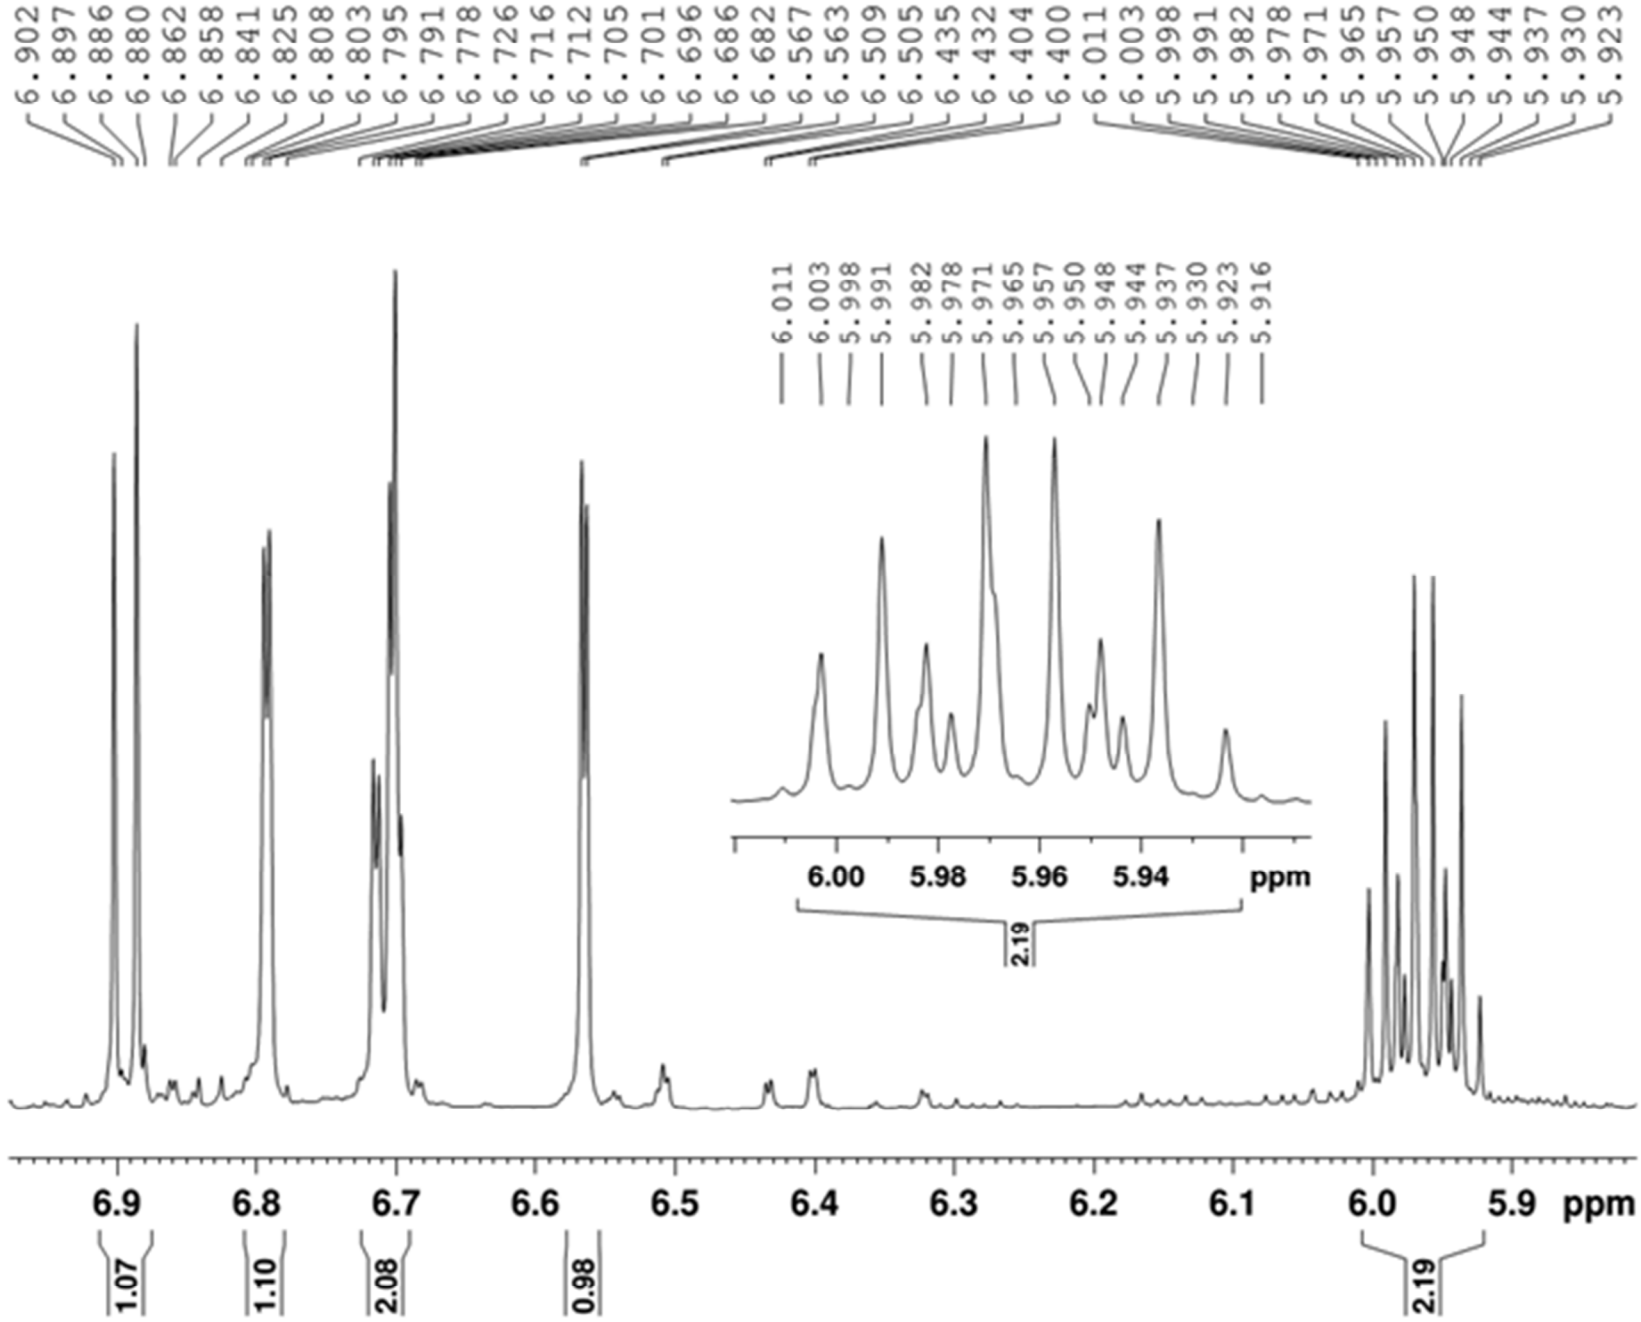

## COMPOUND 3

$^{13}\text{C}$  NMR spectrum ( $\delta$ ,  $\text{CDCl}_3$ , 75 MHz)



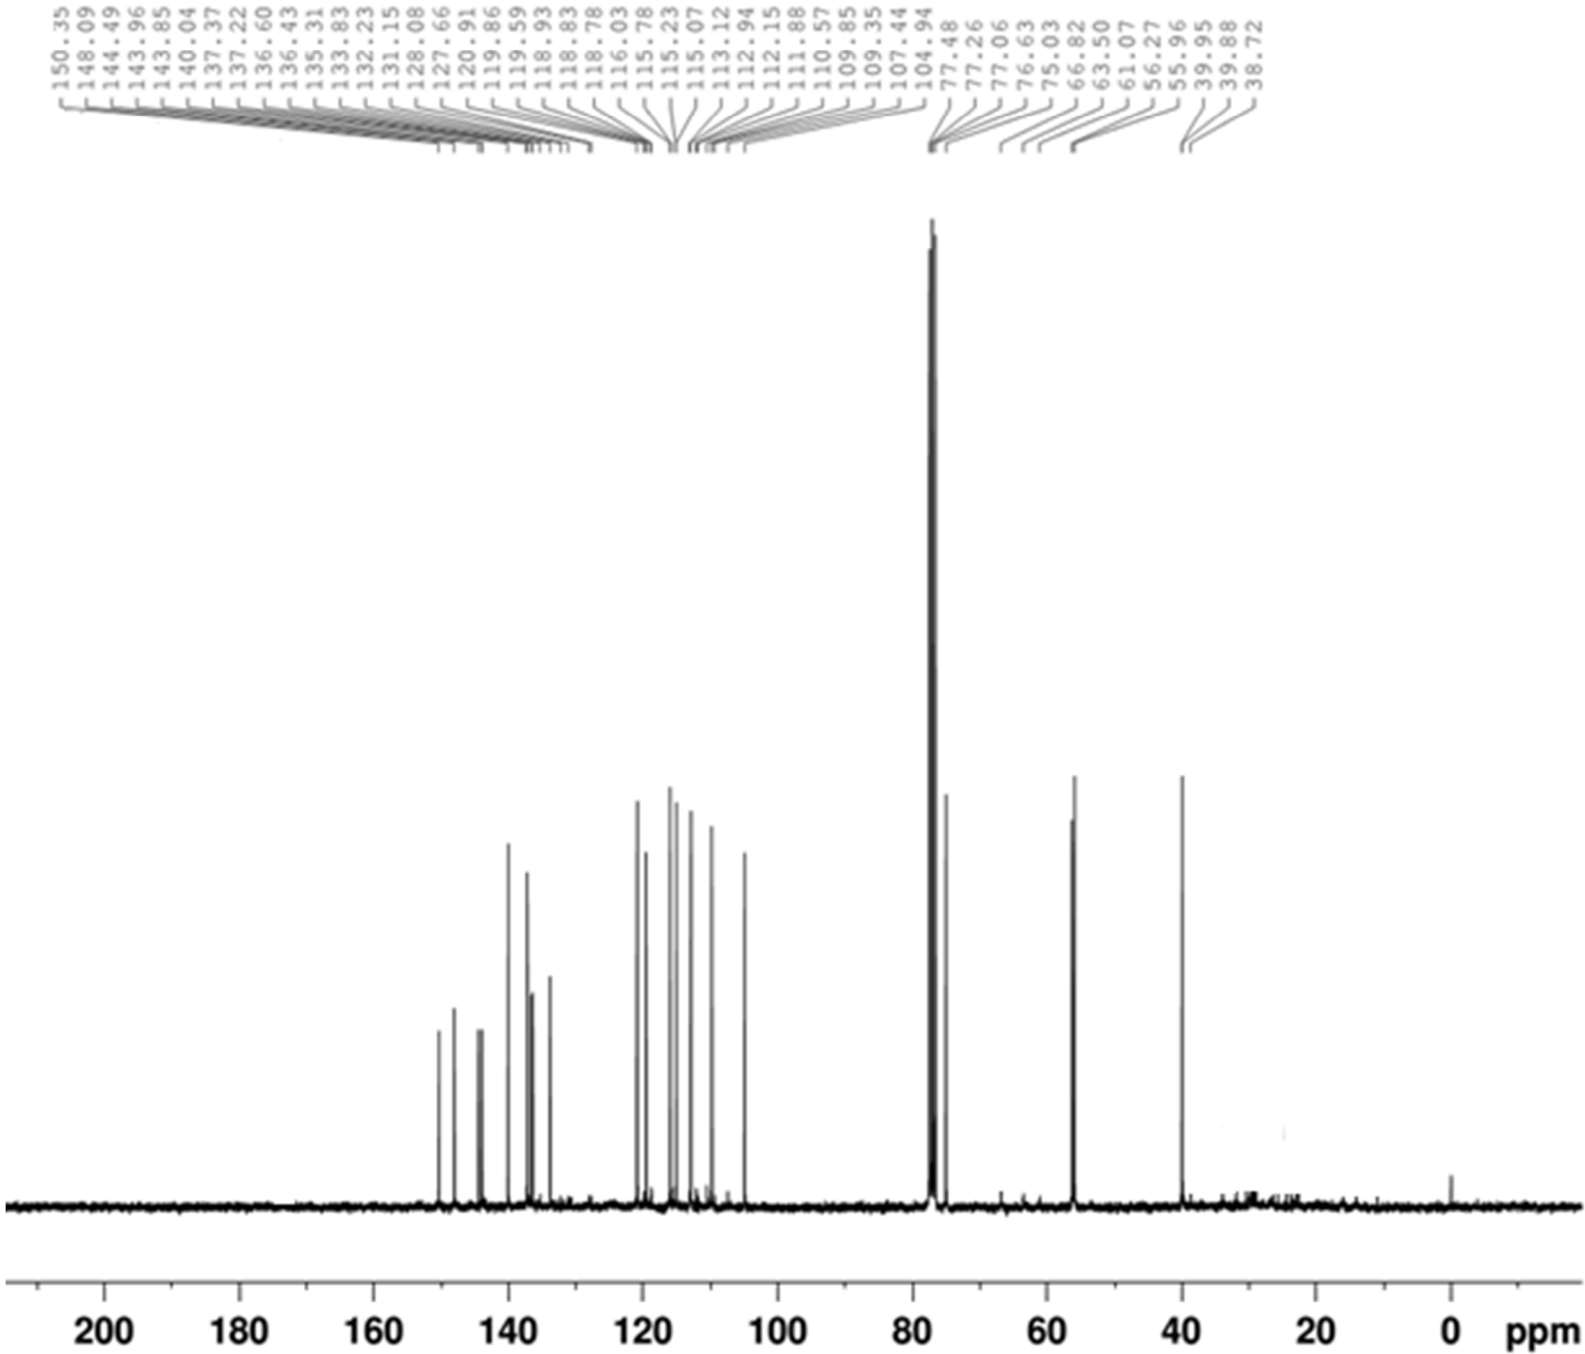

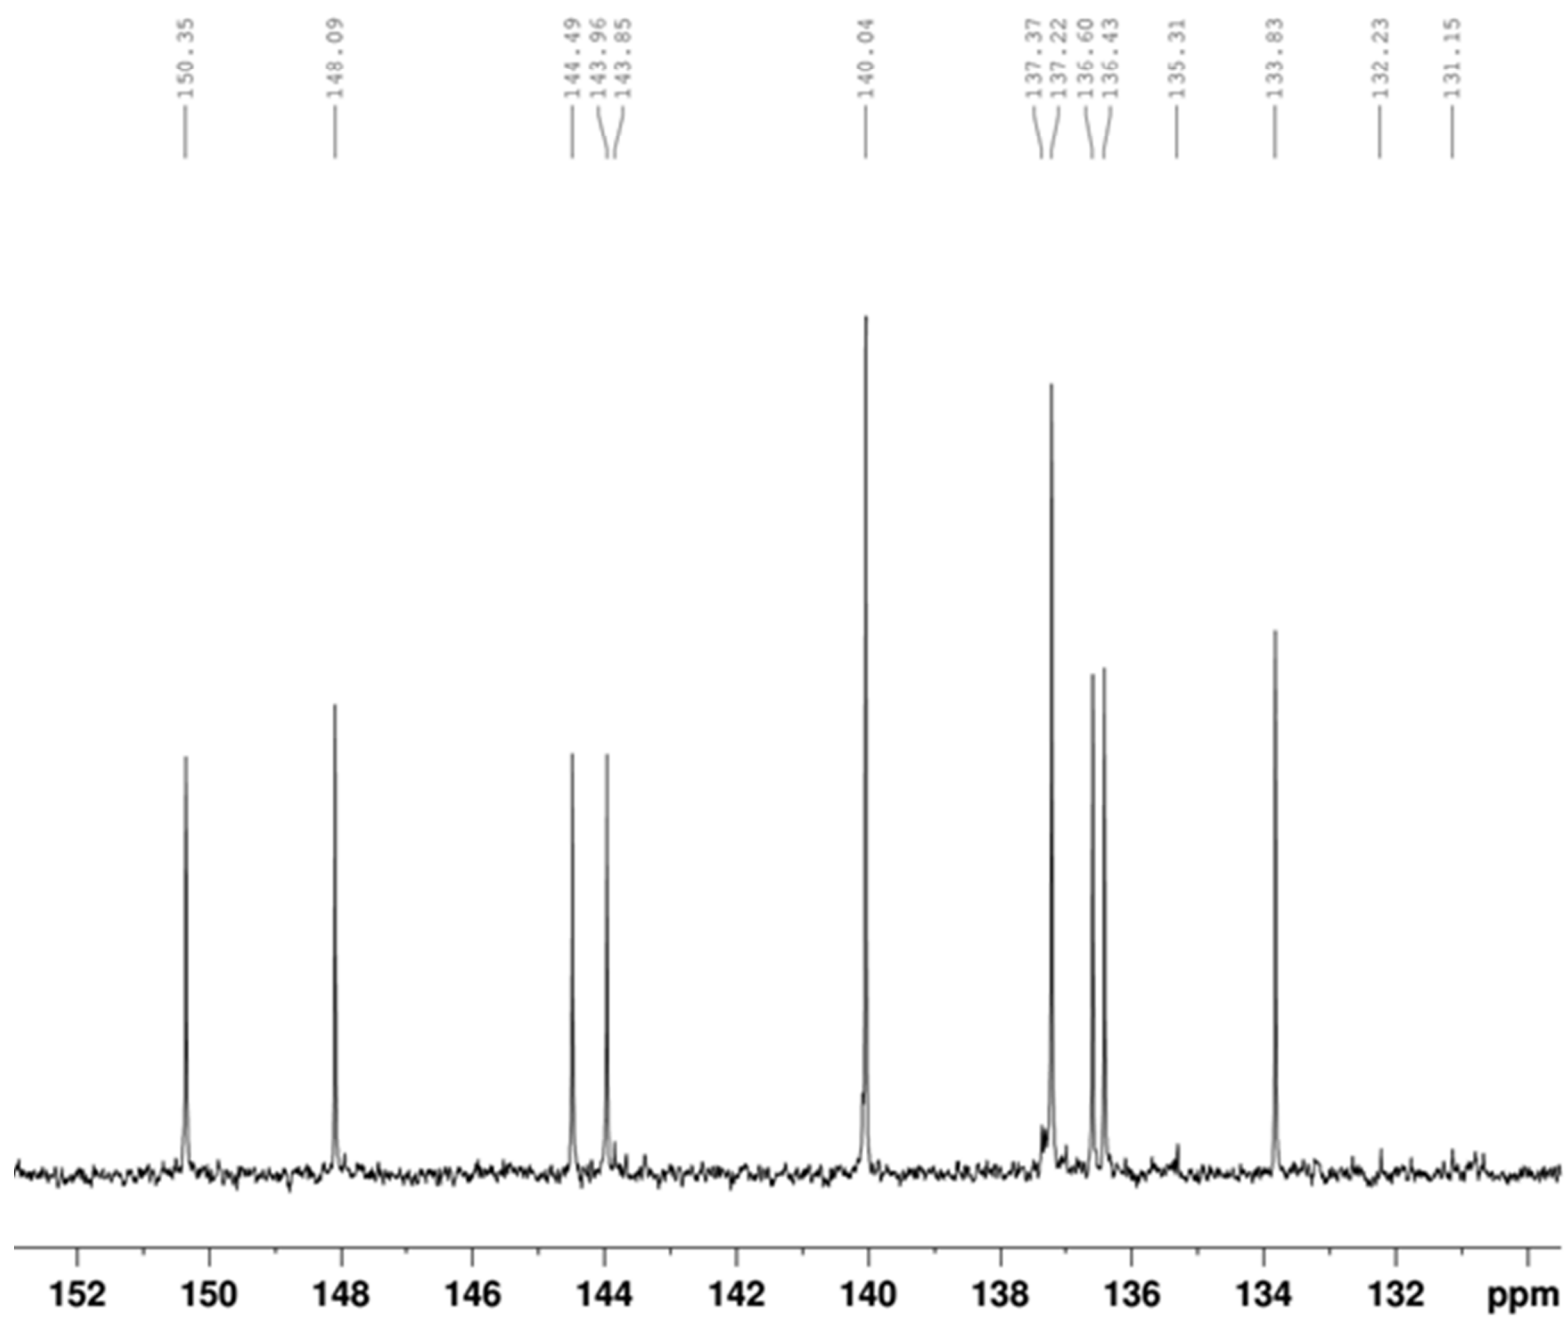

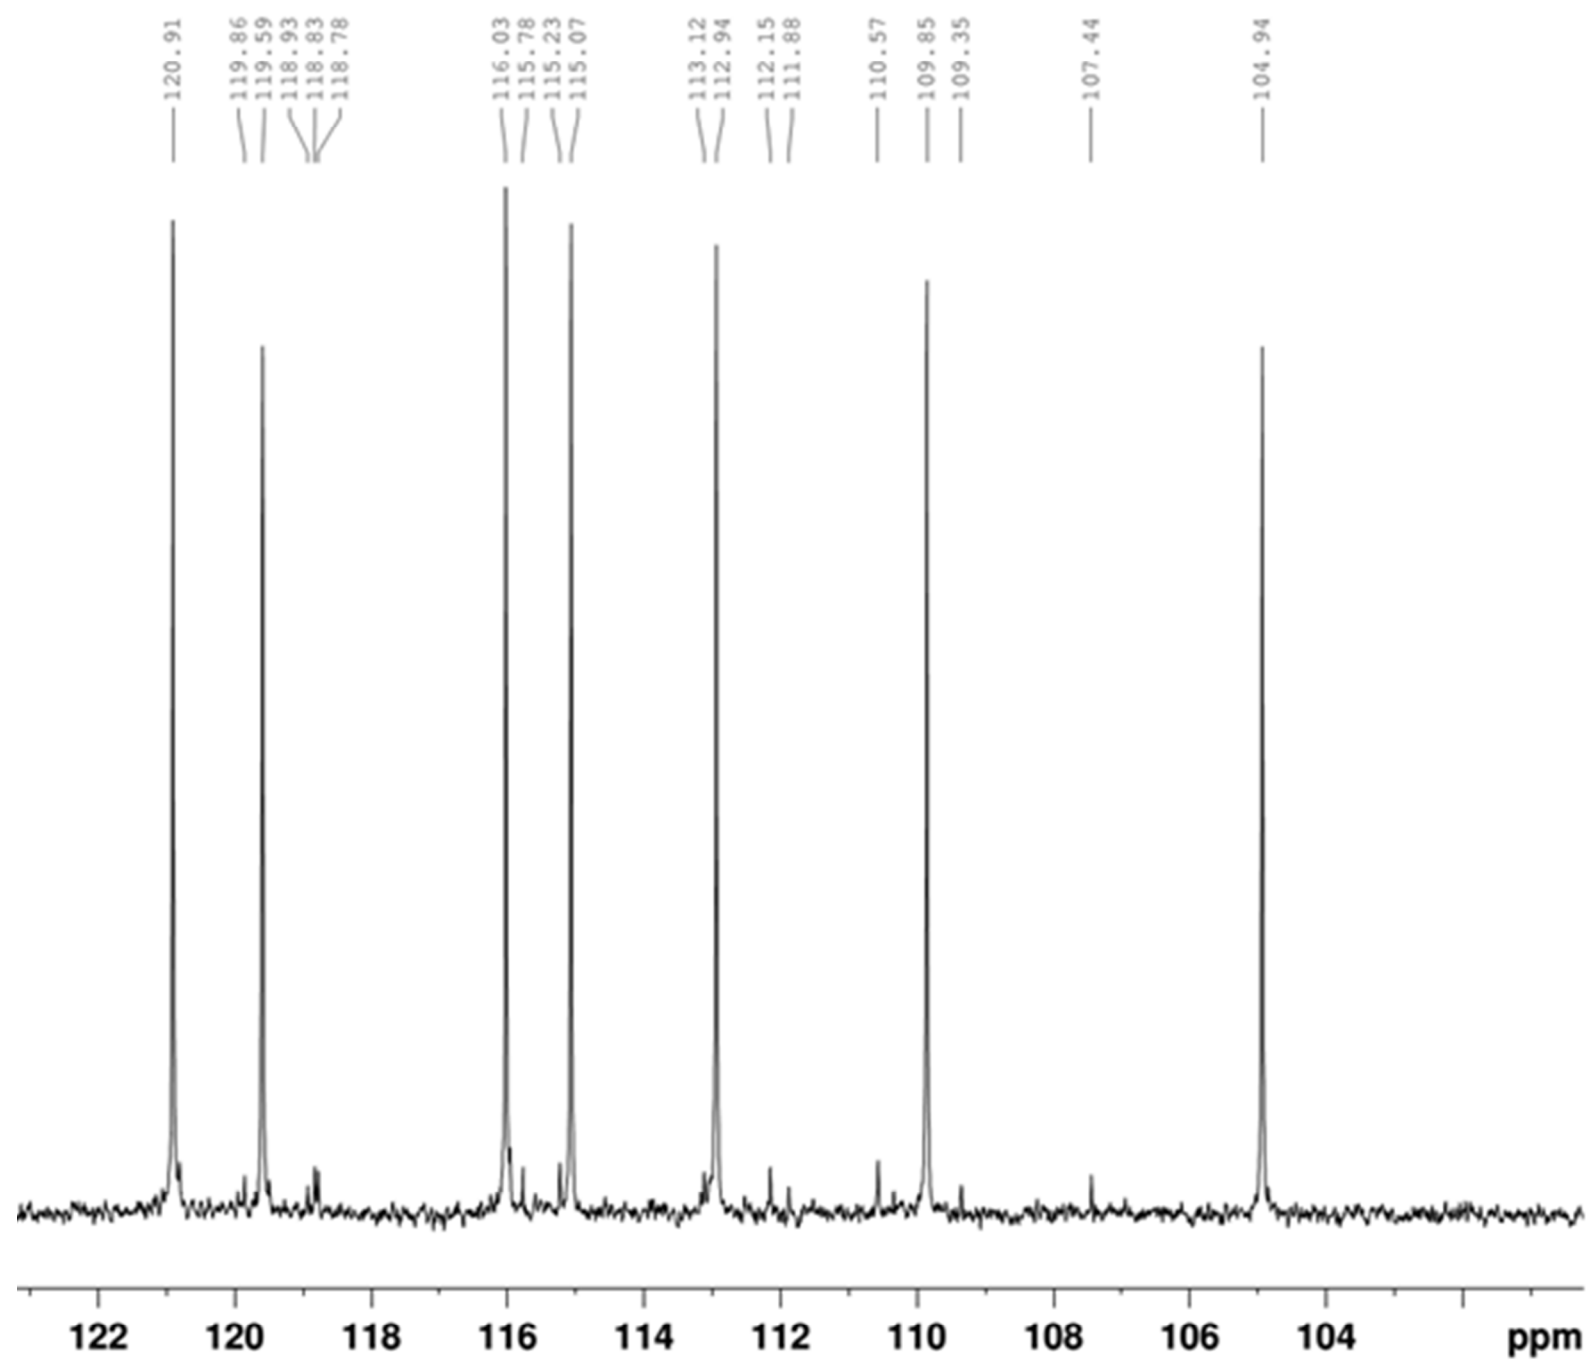

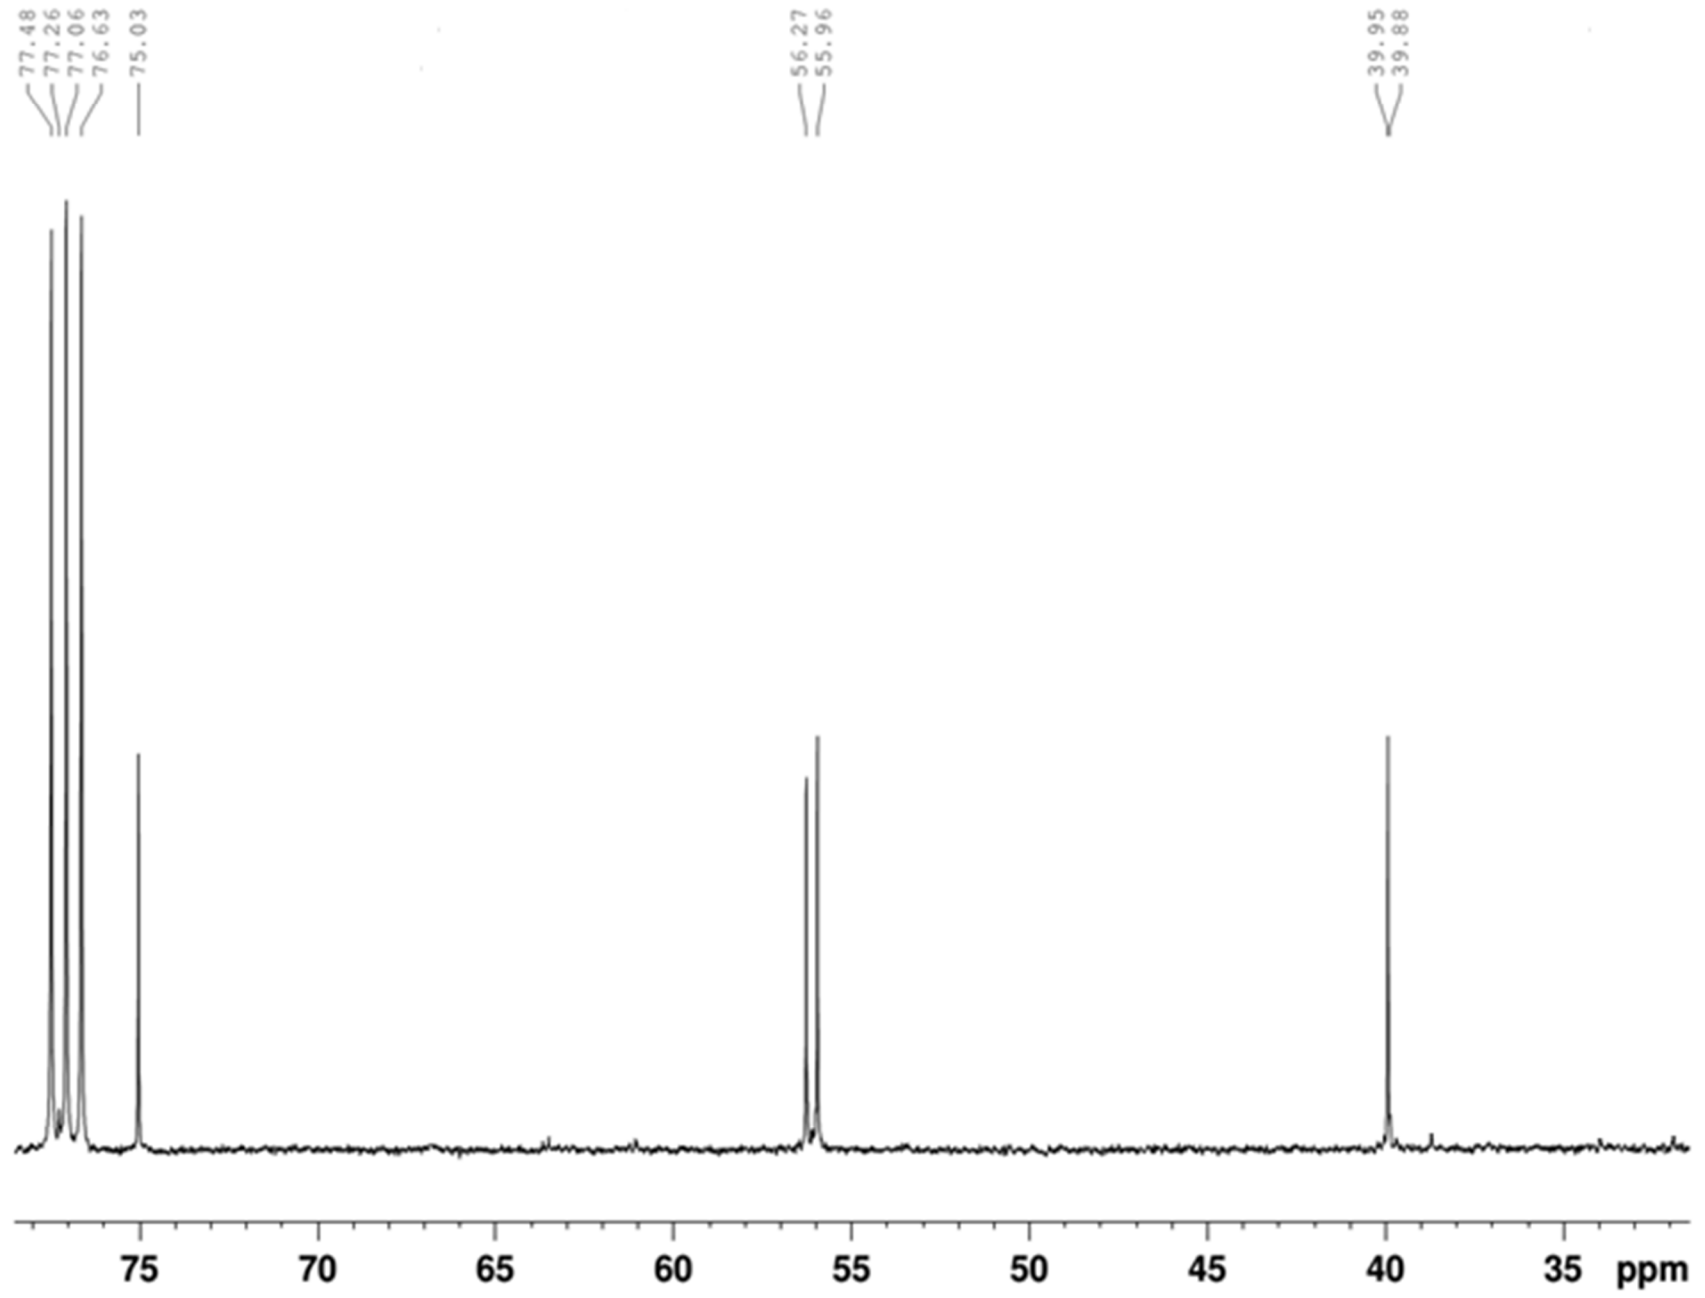

## COMPOUND 3

DEPT 135° NMR spectrum ( $\delta$ , CDCl<sub>3</sub>, 75 MHz)

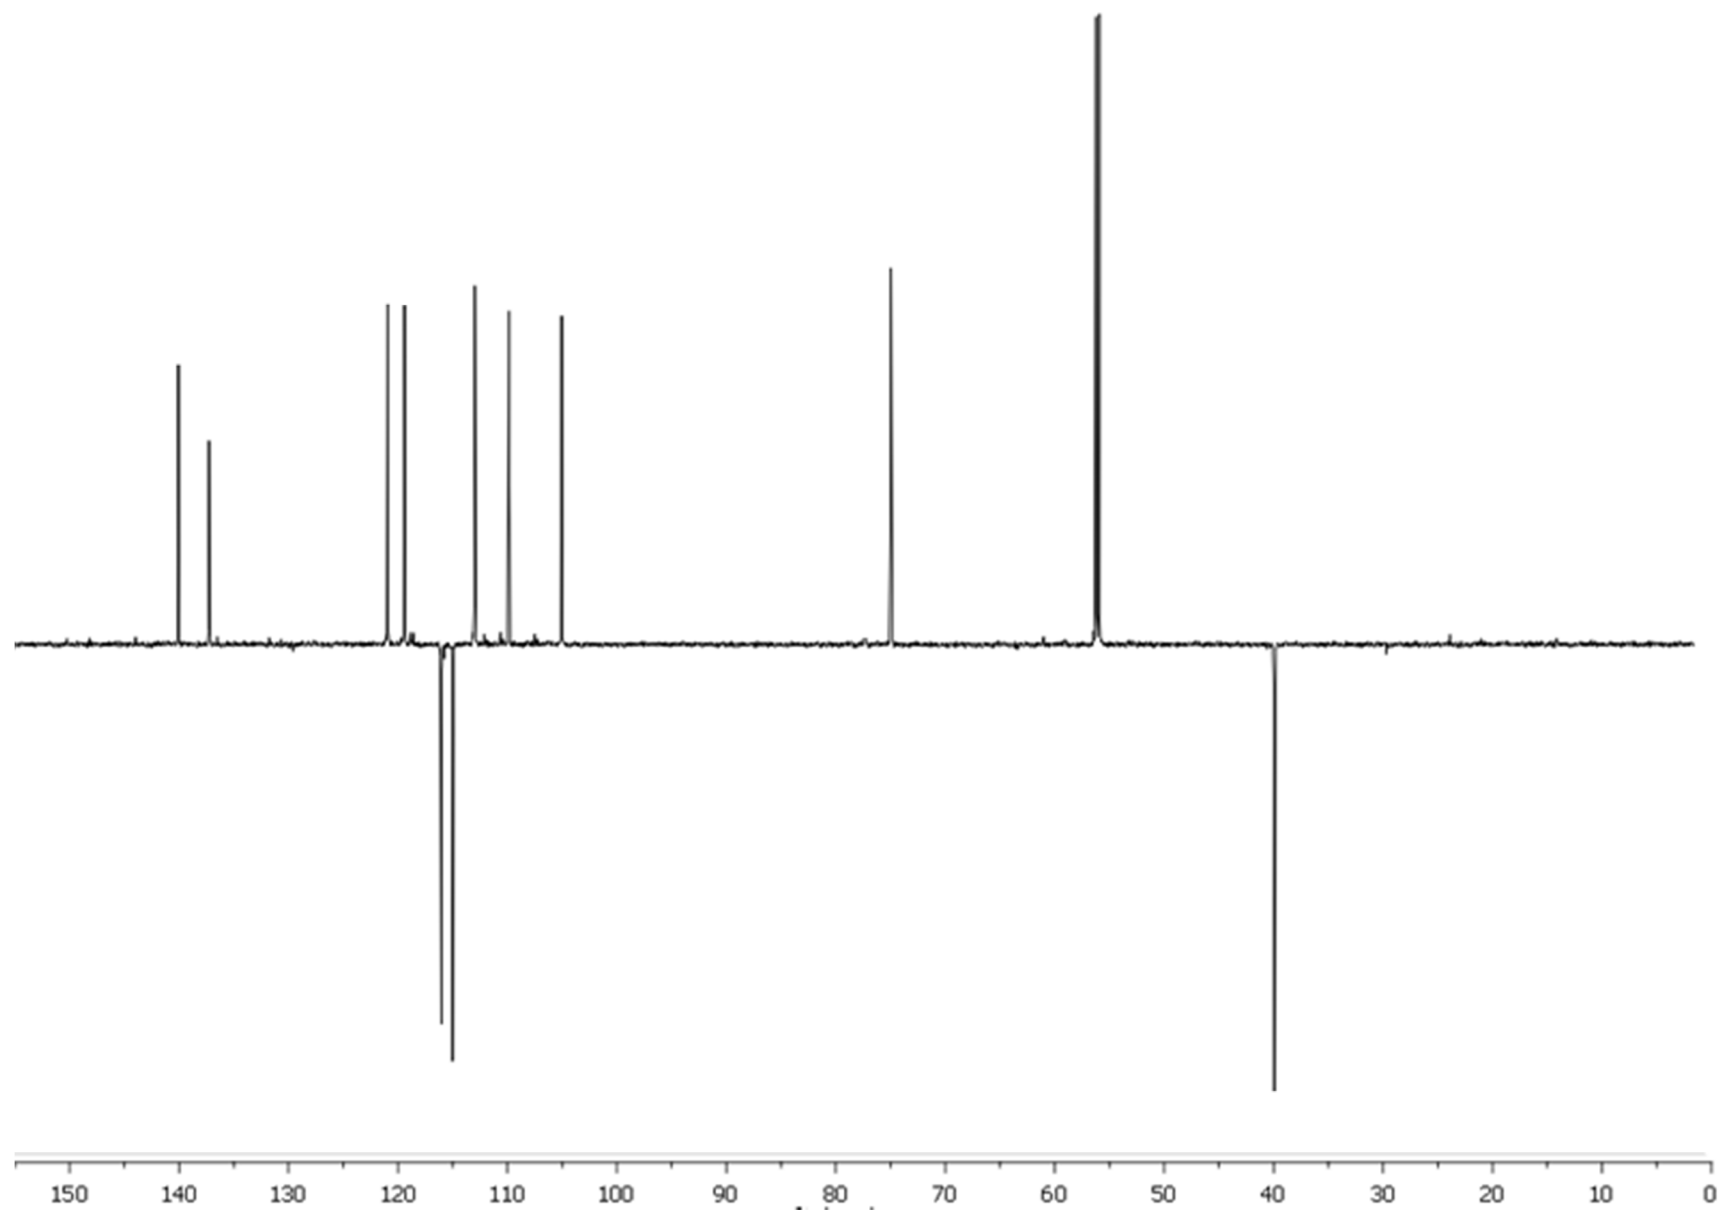

## COMPOUND 3

HMBC NMR spectrum ( $\delta$ , CDCl<sub>3</sub>, 300 and 75 MHz)

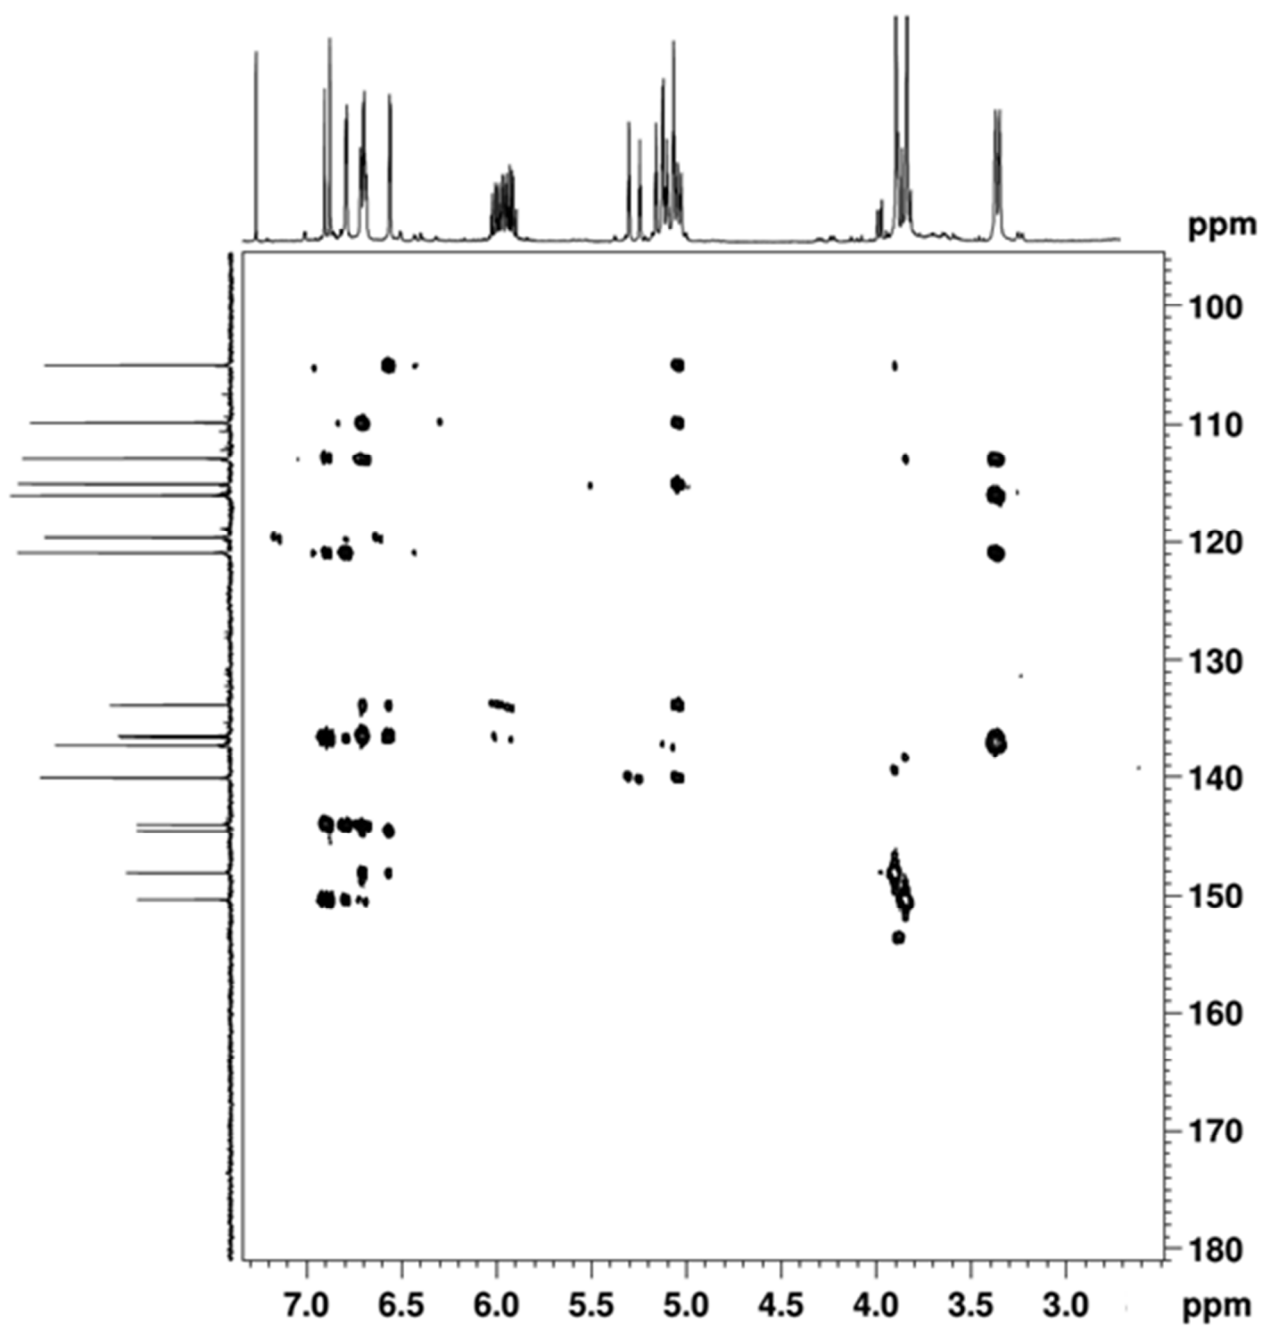



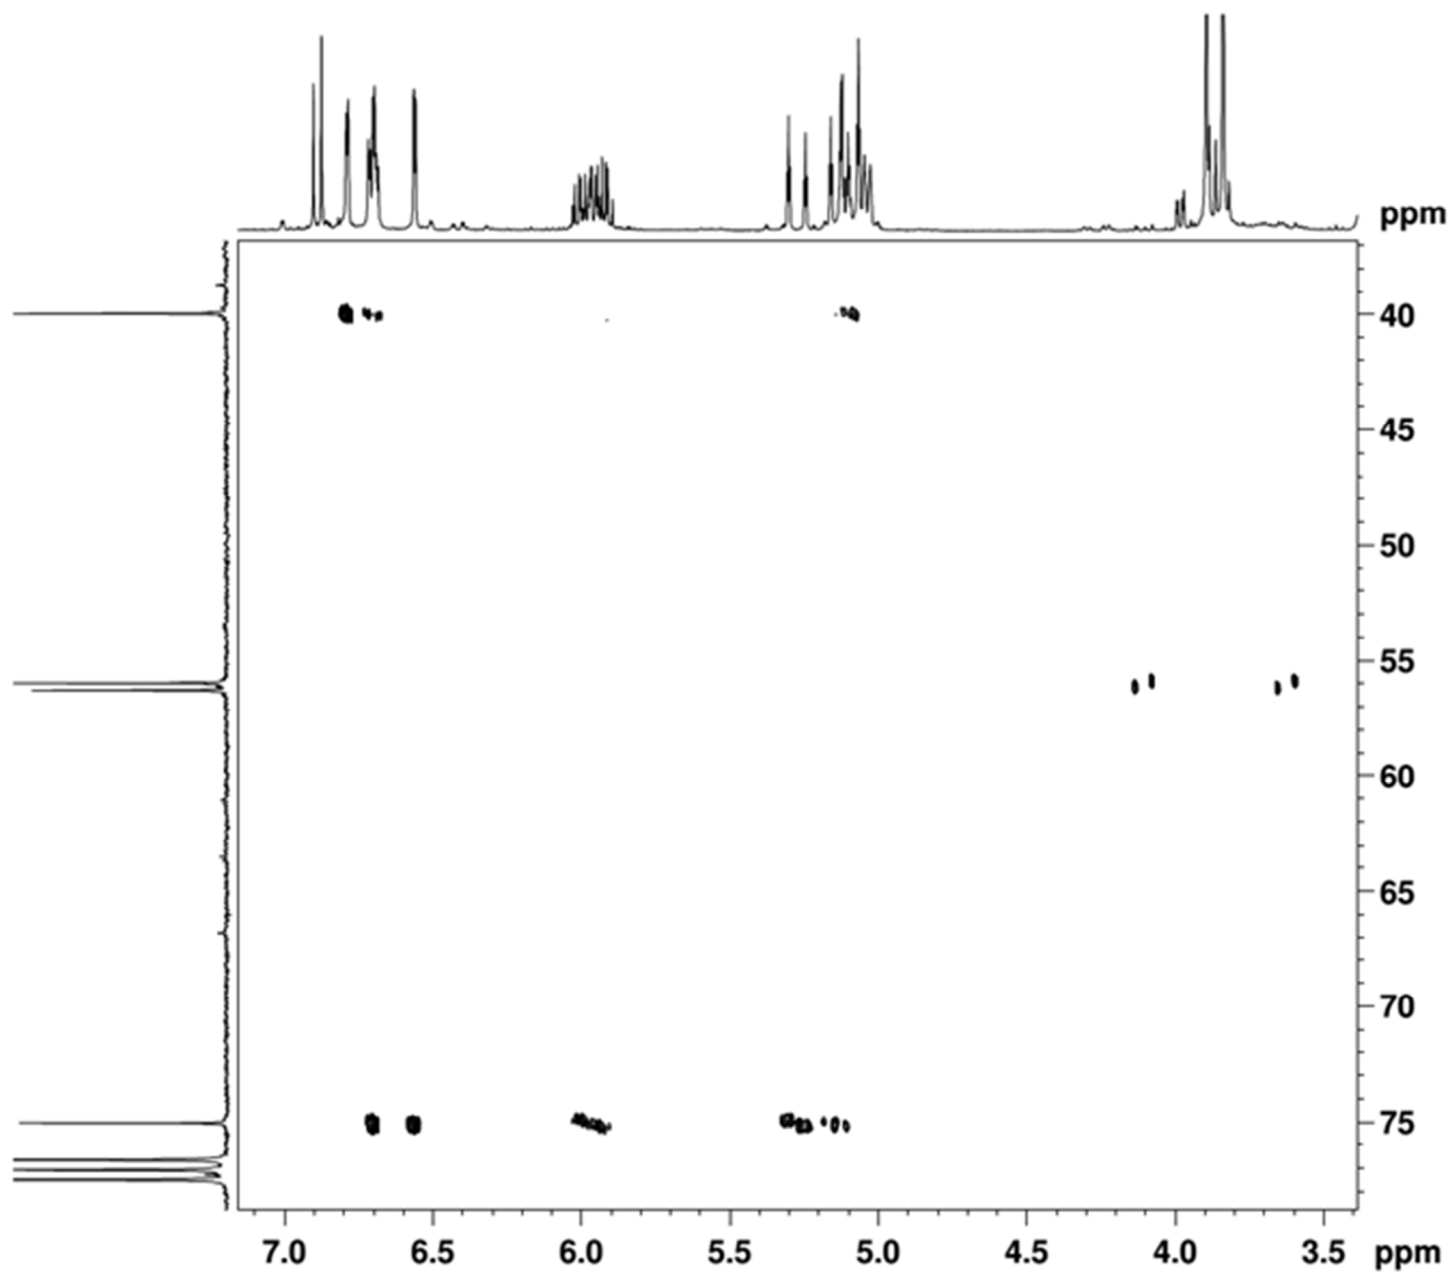

## COMPOUND 3

HSQC NMR spectrum ( $\delta$ , CDCl<sub>3</sub>, 300 and 75 MHz)

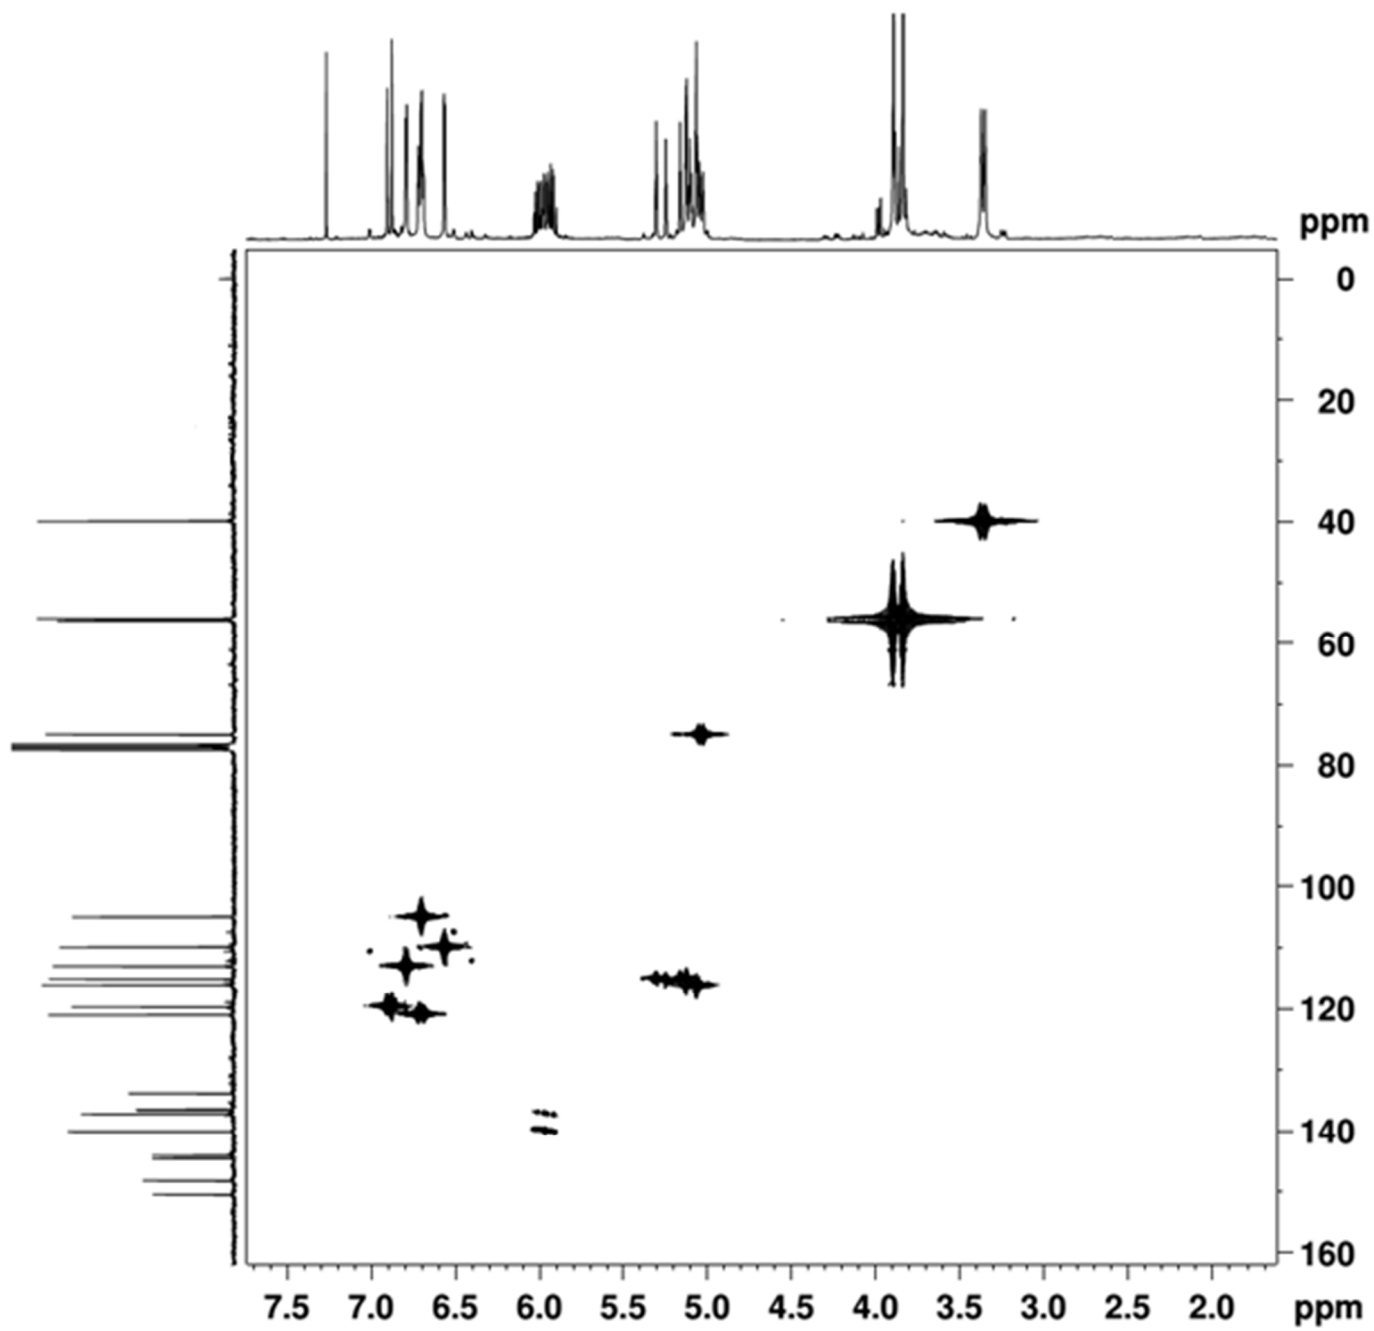

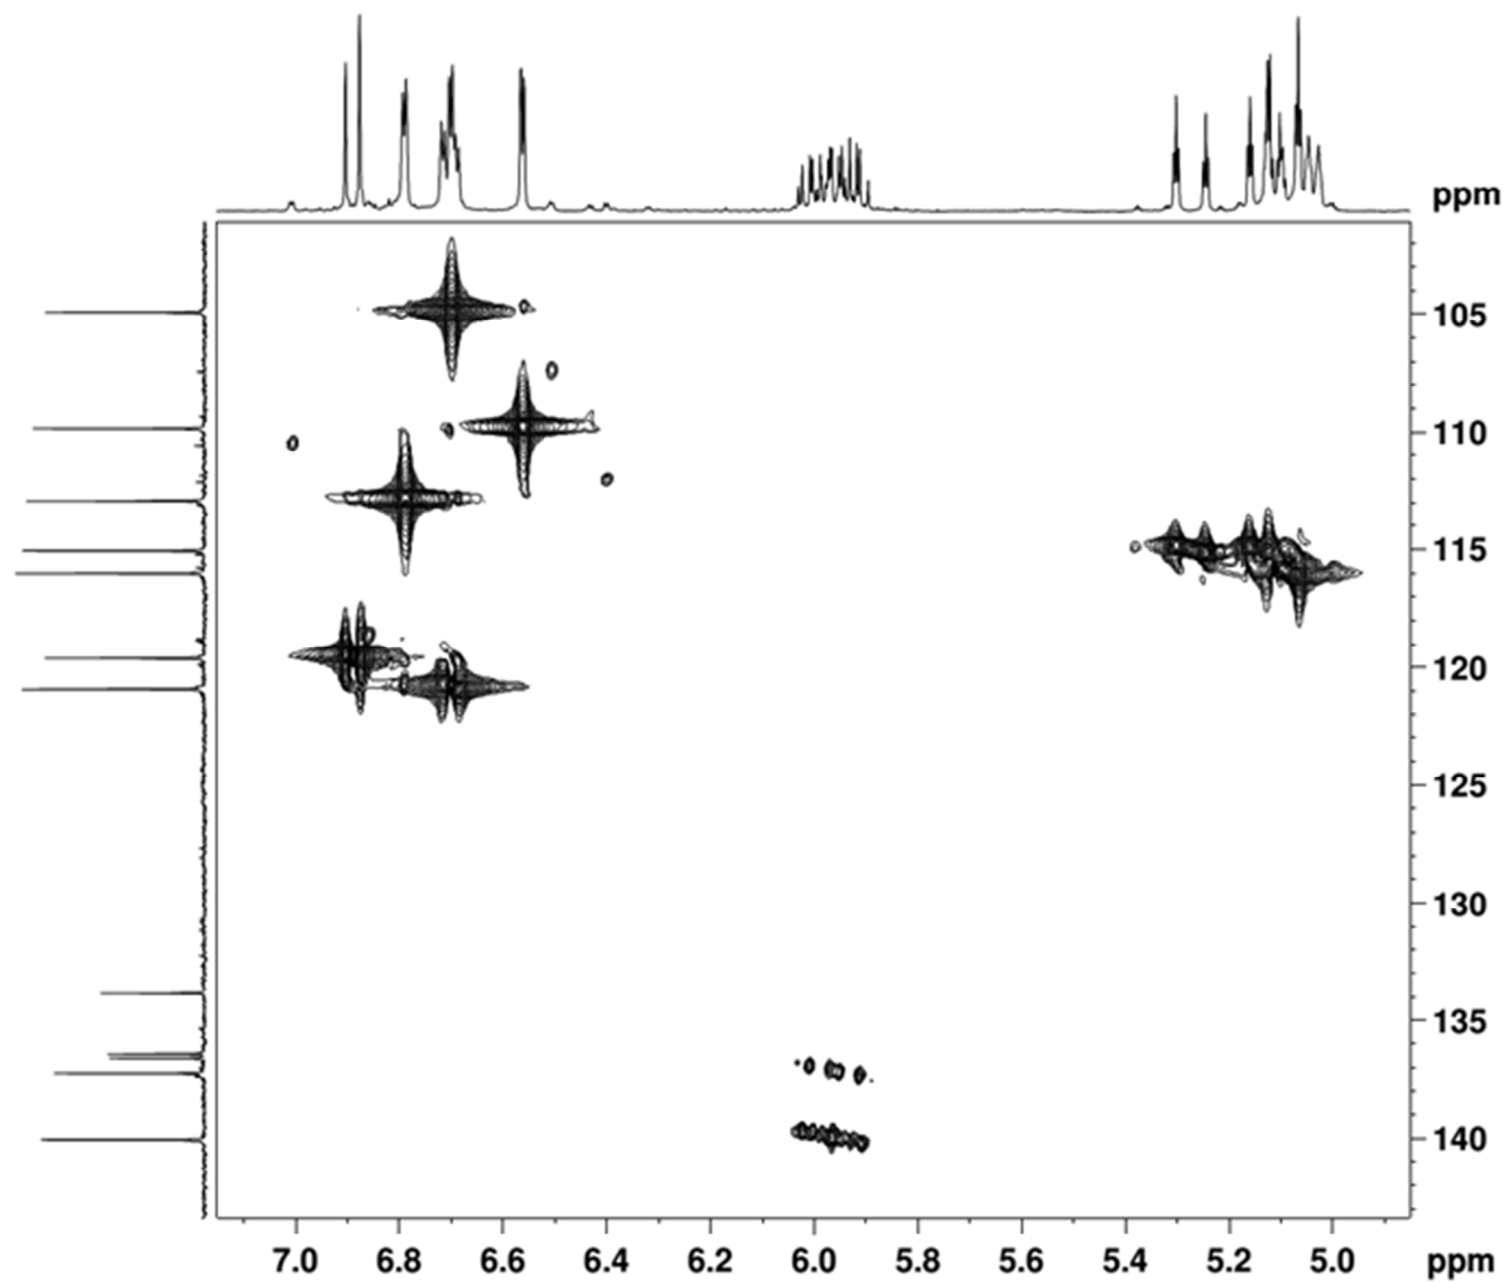

# COMPOUND 3

## MASS SPECTRUM

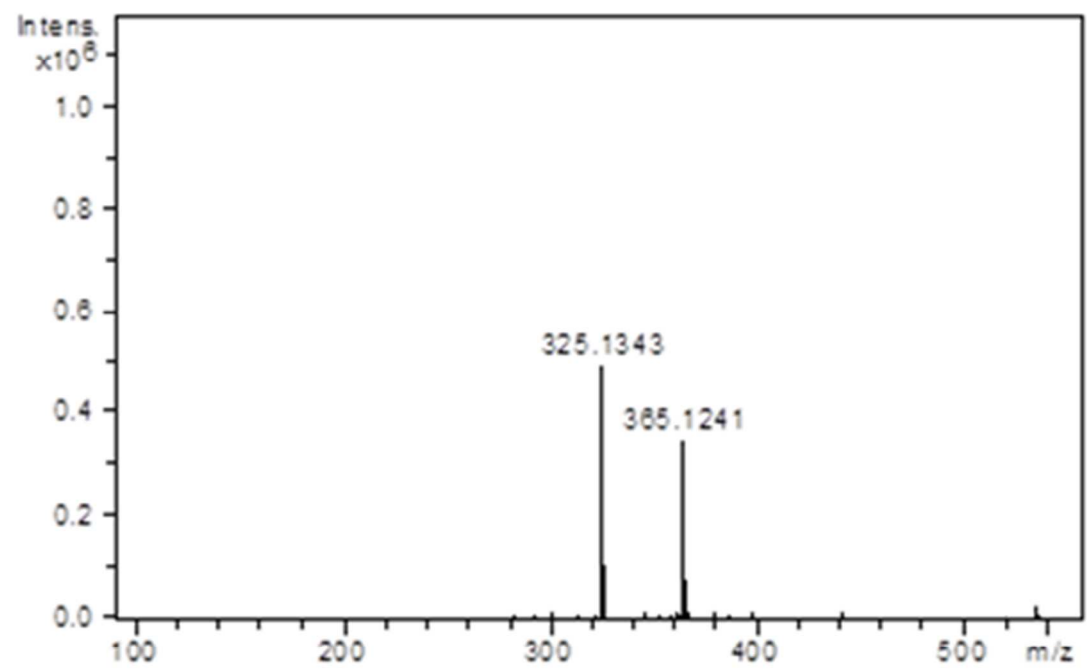

# COMPOUND 3

## INFRARED SPECTRUM

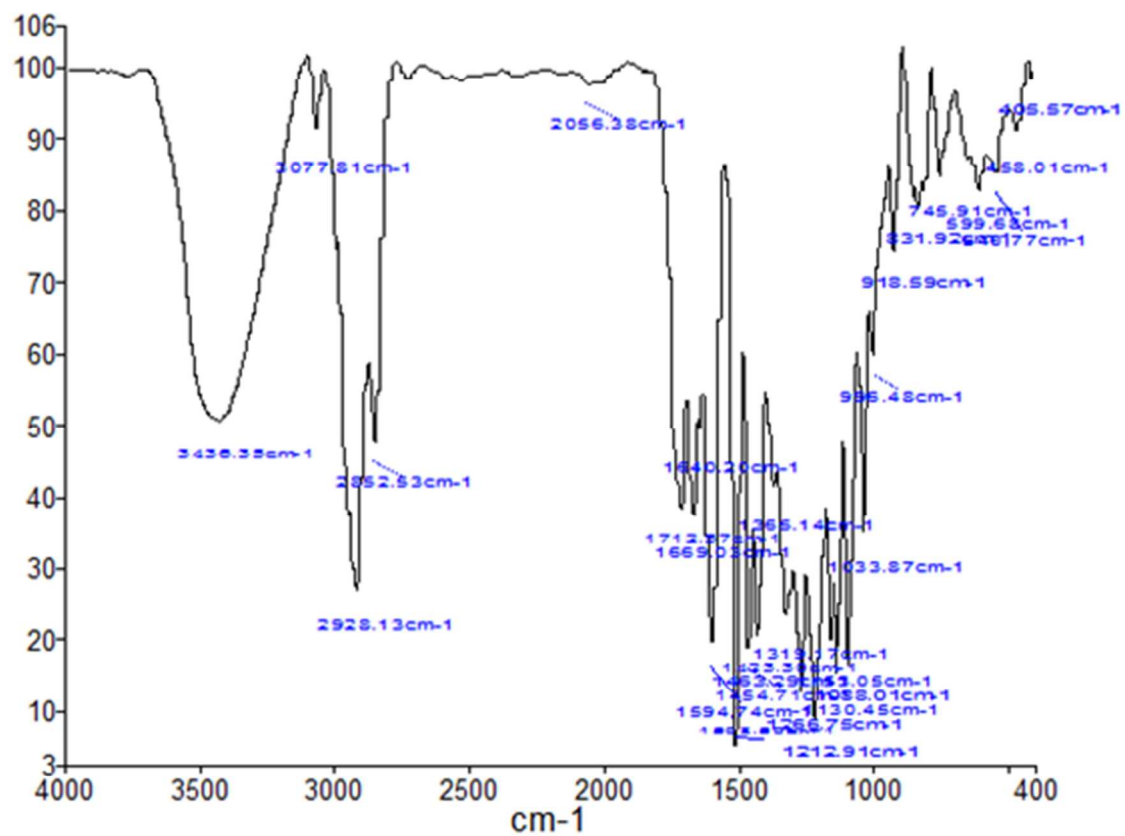

# COMPOUND 3

## CIRCULAR DICHROISM SPECTRUM

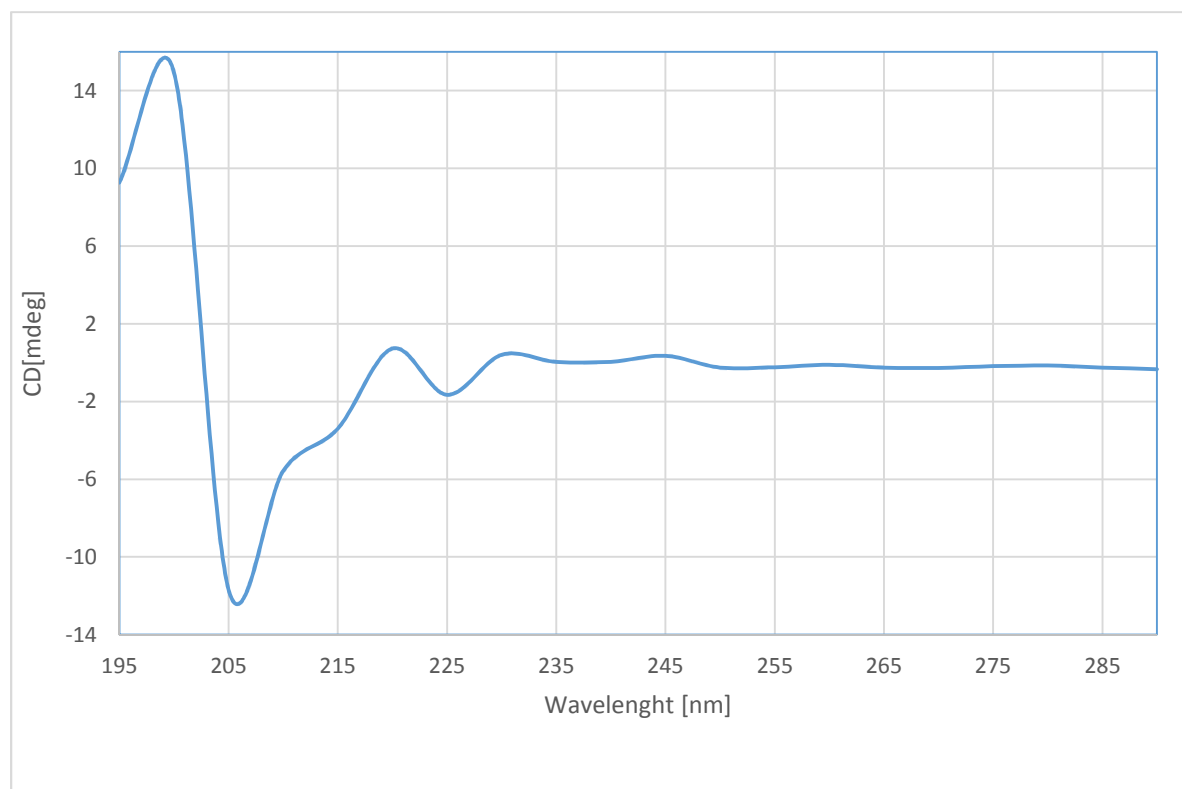

Supplement: NIHMS730390-supplement-Supplemental.pdf [file NIHMS730390-supplement-Supplemental.pdf]
